# Supplementary material for: Embryonic LTR retrotransposons supply promoter modules to somatic tissues
Source: HighWire-hosted journal article supplement (doi:10.1101/gr.275354.121), 2021-10-21
Supplement: Supplemental_Tables.xlsx [file Supplemental_Tables.xlsx]

## Sheet: S1
Supplemental Table S1. List of MLT2A1 elements with activities in embryo, pineal gland, and amniotic membrane.
Chromosome	Start	End	ID	Expressed 4-cells or 8-cells	Strand	Mean exp in embryo (TPM)	Active in embryo	Mean exp in pineal gland (TPM)	Active in pineal gland	Mean exp in AM (TPM)	Active in AM	DUX4 motif	OTX2 motif
chr1	4835033	4835439	2	1	-	0.00674138	No	0	No	0	No	1	0
chr1	6742744	6743159	4	0	-	0	No	0	No	0	No	0	0
chr1	8035701	8036083	5	0	+	0	No	0	No	0	No	1	0
chr1	11575772	11576215	8	1	-	1.14163	No	0.126469	No	0	No	0	0
chr1	12388950	12389357	9	0	-	0	No	0	No	0	No	2	0
chr1	12676020	12676465	10	5	-	1.68322	Yes	0	No	0	No	1	1
chr1	18193355	18193790	12	0	-	0	No	0	No	0	No	1	1
chr1	19944624	19945000	13	0	+	0	No	0	No	0	No	1	0
chr1	29376076	29376521	15	0	-	0	No	0	No	0	No	2	0
chr1	29794200	29794568	16	0	+	0	No	0	No	0	No	0	0
chr1	29799583	29800046	18	0	+	0	No	0	No	0	No	1	0
chr1	31518485	31518912	19	4	+	4.38452	No	0	No	0	No	1	0
chr1	37365034	37365456	20	1	+	0.441423	No	0	No	0	No	2	1
chr1	37371193	37371640	22	0	+	0	No	0	No	0	No	1	0
chr1	38144394	38144849	23	0	+	0	No	0	No	0	No	1	0
chr1	38150489	38150922	24	0	+	0	No	0	No	0	No	0	0
chr1	42644073	42644532	25	30	-	15.9837	Yes	0	No	0	No	1	0
chr1	48501724	48502120	28	1	-	0.426806	No	0	No	0	No	2	0
chr1	49439504	49439944	29	0	+	0	No	0	No	0	No	1	0
chr1	49572732	49573124	30	1	+	0.172525	No	0	No	0	No	1	1
chr1	49578830	49579287	32	0	+	0	No	0	No	0	No	1	0
chr1	49636821	49637265	33	0	+	0	No	0	No	0	No	1	0
chr1	49691599	49691994	34	1	+	0.457502	No	0	No	0	No	2	1
chr1	50165833	50166207	36	1	-	0.00896644	No	0	No	0	No	1	0
chr1	50168899	50169387	37	0	-	0	No	0	No	0	No	0	0
chr1	52444510	52444906	38	0	+	0	No	0	No	0	No	1	1
chr1	55727847	55728209	40	0	+	0	No	0	No	0	No	1	0
chr1	55734488	55734929	43	3	+	0.221904	No	0	No	0	No	2	0
chr1	55952796	55953233	44	8	+	1.50592	Yes	0.328487	No	0	No	2	1
chr1	57557023	57557523	45	0	+	0	No	0.300118	No	0	No	1	0
chr1	57570005	57570431	46	13	+	4.89674	Yes	0	No	0	No	2	0
chr1	60063853	60064265	47	0	+	0	No	0	No	0	No	0	0
chr1	60249082	60249468	49	2	+	0.482827	No	0	No	0	No	2	0
chr1	60369420	60369706	51	0	+	0	No	0	No	0	No	1	0
chr1	63722817	63723202	53	0	-	0	No	0	No	0	No	0	0
chr1	65929983	65930375	55	0	-	0	No	0	No	0	No	0	0
chr1	65948281	65948705	56	0	-	0	No	0	No	0	No	0	0
chr1	67288387	67288843	60	0	+	0	No	0	No	0	No	1	1
chr1	69518184	69518631	61	0	+	0	No	0	No	0	No	1	0
chr1	70007977	70008411	63	6	-	1.12121	Yes	0	No	0	No	2	0
chr1	70646118	70646505	64	0	+	0	No	0	No	0	No	2	0
chr1	70712394	70712787	67	0	-	0	No	0	No	0	No	2	0
chr1	72312692	72313074	69	0	-	0	No	0	No	0	No	0	0
chr1	72318693	72319126	70	0	-	0	No	0	No	0	No	0	0
chr1	73843995	73844270	71	0	-	0	No	0	No	0	No	0	0
chr1	74177248	74177486	72	0	+	0	No	0	No	0	No	0	0
chr1	76874386	76874825	73	30	-	16.4247	Yes	1.28932	No	0	No	2	2
chr1	76880411	76880817	74	12	-	2.95559	Yes	0.304897	No	0	No	2	2
chr1	77182271	77182524	76	0	-	0	No	0	No	0	No	0	0
chr1	77189318	77189694	78	0	+	0	No	0	No	0	No	1	0
chr1	77488498	77488925	80	5	-	1.84288	Yes	0	No	0	No	2	1
chr1	78402257	78402652	82	1	-	0.276255	No	0	No	0	No	2	0
chr1	83057343	83057781	83	1	+	0.114579	No	0	No	0	No	2	0
chr1	84029299	84029733	84	1	+	0.000800578	No	0	No	0	No	2	0
chr1	84978744	84979221	85	0	-	0	No	0	No	0	No	2	0
chr1	85444823	85445264	86	0	-	0	No	0	No	0	No	0	0
chr1	85967832	85968262	87	0	+	0	No	0	No	0	No	1	0
chr1	86414606	86414979	88	0	+	0	No	0	No	0	No	1	0
chr1	86514519	86514952	89	0	+	0	No	0	No	0	No	2	1
chr1	87232319	87232810	90	0	-	0	No	0	No	0	No	1	0
chr1	87846754	87847167	91	0	+	0	No	0	No	0	No	1	0
chr1	88897655	88898051	94	0	+	0	No	0	No	0	No	1	0
chr1	88904109	88904488	96	0	+	0	No	0	No	0	No	0	0
chr1	90881609	90882026	98	0	-	0	No	0	No	0	No	1	0
chr1	91039876	91040291	99	0	+	0	No	0	No	0	No	2	1
chr1	91045816	91046245	100	1	+	0.389196	No	0	No	0	No	1	0
chr1	91157581	91157983	101	0	-	0	No	0	No	0	No	1	0
chr1	91460654	91461060	103	0	-	0	No	0	No	0	No	0	0
chr1	91468922	91469313	105	1	-	0.00494702	No	0	No	0	No	1	0
chr1	92614391	92614769	106	6	+	0.595576	Yes	0	No	0	No	2	0
chr1	92619079	92619505	108	0	+	0	No	0	No	0	No	1	0
chr1	94161626	94162052	109	0	-	0	No	0	No	0	No	1	0
chr1	94166772	94167221	110	0	-	0	No	0	No	0	No	0	0
chr1	95633547	95633922	111	0	+	0	No	0	No	0	No	2	0
chr1	95644580	95645009	112	0	-	0	No	0	No	0	No	2	0
chr1	96671715	96672148	113	0	+	0	No	0	No	0	No	1	0
chr1	96945268	96945709	114	1	-	0.000728804	No	0	No	0	No	2	0
chr1	98319272	98319642	115	0	+	0	No	0	No	0	No	2	0
chr1	99393008	99393446	117	0	+	0	No	0	No	0	No	2	0
chr1	100567578	100567973	118	0	+	0	No	0	No	0	No	1	0
chr1	100784023	100784536	120	0	+	0	No	0	No	0	No	1	0
chr1	101359128	101359565	121	37	-	35.5648	Yes	0.126469	No	0	No	2	0
chr1	101423159	101423555	122	5	-	6.38535	Yes	0	No	0	No	2	0
chr1	103266758	103267219	123	0	+	0	No	0	No	0	No	1	0
chr1	103272745	103273141	124	1	+	0.152772	No	0	No	0	No	1	0
chr1	103351683	103352239	126	0	-	0	No	0	No	0	No	0	0
chr1	104555599	104555993	127	3	+	2.06428	No	0	No	0	No	2	0
chr1	104561793	104562197	129	0	+	0	No	0	No	0.102318	No	1	1
chr1	105752829	105753215	130	0	+	0	No	0	No	0	No	1	0
chr1	105759317	105759721	132	0	+	0	No	0.126469	No	0	No	0	0
chr1	106585293	106585690	133	18	-	8.03677	Yes	0	No	0	No	1	1
chr1	106744216	106744626	135	0	-	0	No	0	No	0	No	1	0
chr1	110919149	110919585	136	3	+	1.05027	No	0	No	0	No	2	0
chr1	112126002	112126465	137	1	-	0.00494702	No	0	No	0	No	1	0
chr1	112132193	112132607	138	0	-	0	No	0	No	0	No	1	1
chr1	114065117	114065541	139	5	-	0.0141565	Yes	0	No	0	No	1	0
chr1	114071552	114071980	141	4	-	3.67661	No	0	No	0	No	1	0
chr1	114290021	114290452	142	12	+	1.61792	Yes	0	No	0	No	2	0
chr1	118293550	118294031	143	4	-	0.285823	No	0	No	0	No	2	0
chr1	118325026	118325445	145	0	-	0	No	0	No	0	No	1	0
chr1	119292686	119293153	146	0	+	0	No	0	No	0	No	1	0
chr1	120002965	120003362	147	0	+	0	No	0	No	0	No	1	0
chr1	120787176	120787596	150	0	-	0	No	0	No	0	No	1	0
chr1	146023214	146023650	152	2	-	0.133351	No	0	No	0	No	1	0
chr1	146162387	146162807	153	0	+	0	No	0	No	0	No	1	0
chr1	147147588	147147960	155	0	+	0	No	0.089214	No	0	No	1	0
chr1	148613326	148613723	157	0	+	0	No	0	No	0	No	1	0
chr1	149457520	149457941	160	0	-	0	No	0	No	0	No	1	0
chr1	150189828	150190249	161	155	+	181.663	Yes	0	No	0	No	1	0
chr1	158744125	158744569	163	1	-	0.00129992	No	0	No	0	No	1	0
chr1	161431523	161431930	165	10	-	3.4253	Yes	0	No	0	No	2	0
chr1	161438569	161439039	166	1	-	0.360663	No	0	No	0	No	1	0
chr1	162848890	162849404	167	0	-	0	No	0	No	0	No	0	0
chr1	163101895	163102344	168	1	+	0.00292333	No	0	No	0	No	2	0
chr1	165627024	165627444	169	0	+	0	No	0	No	0	No	0	0
chr1	166210274	166210556	170	1	+	0.378572	No	0	No	0	No	0	1
chr1	168167038	168167397	173	0	-	0	No	0	No	0	No	1	0
chr1	170406302	170406710	174	0	+	0	No	0	No	0	No	1	0
chr1	170770748	170771164	176	10	-	9.99899	Yes	0	No	0	No	2	0
chr1	172688149	172688548	180	0	-	0	No	0	No	0	No	1	1
chr1	172694765	172695078	181	0	-	0	No	0.089214	No	0	No	1	0
chr1	174519235	174519627	184	0	-	0	No	0	No	0	No	0	0
chr1	175231890	175232343	187	0	-	0	No	0	No	0	No	1	0
chr1	175242254	175242656	188	25	+	0.128242	Yes	0	No	0	No	2	0
chr1	177377753	177378204	191	2	+	0.151771	No	0	No	0	No	1	0
chr1	182583468	182584027	193	0	+	0	No	0	No	0	No	1	0
chr1	184289610	184289951	194	0	+	0	No	0	No	0	No	0	0
chr1	187362604	187363082	196	0	+	0	No	0	No	0	No	0	0
chr1	188335017	188335444	197	0	-	0	No	0	No	0	No	1	0
chr1	188341836	188342121	199	0	-	0	No	0	No	0	No	1	0
chr1	188344323	188344676	200	0	+	0	No	0.126469	No	0.102318	No	1	0
chr1	188524275	188524672	202	0	+	0	No	0	No	0	No	1	0
chr1	188606878	188607300	205	0	+	0	No	0	No	0	No	1	0
chr1	188613138	188613573	206	0	+	0	No	0	No	0	No	0	0
chr1	189600252	189600636	208	0	-	0	No	0	No	0	No	0	0
chr1	191234150	191234553	209	0	+	0	No	0	No	0	No	0	0
chr1	191240322	191240707	210	7	+	0.0163563	Yes	0	No	0	No	1	0
chr1	191825118	191825500	213	0	-	0	No	0	No	0	No	1	1
chr1	191828586	191828989	214	0	-	0	No	0	No	0	No	1	0
chr1	194920807	194921256	215	1	+	0.245032	No	0	No	0	No	2	0
chr1	195991038	195991365	217	0	-	0	No	0	No	0	No	2	0
chr1	196164251	196164703	219	6	+	2.59115	Yes	0	No	0	No	1	0
chr1	198517103	198517521	221	1	-	0.000924991	No	0	No	0	No	0	0
chr1	199074496	199074863	222	0	+	0	No	0	No	0	No	1	0
chr1	199099186	199099639	223	1	+	0.00934204	No	0	No	0	No	2	0
chr1	203611604	203611840	227	0	-	0	No	0	No	0	No	0	0
chr1	203788026	203788381	229	0	-	0	No	0	No	0	No	1	0
chr1	204234572	204234954	231	0	+	0	No	0	No	0	No	1	0
chr1	204240742	204241173	233	0	+	0	No	0	No	0	No	1	0
chr1	211115320	211115701	234	6	+	2.33845	Yes	0	No	0	No	1	1
chr1	212124485	212124837	237	0	+	0	No	0	No	0	No	0	0
chr1	214246136	214246589	238	6	-	0.421724	Yes	0	No	0	No	1	0
chr1	216137486	216137855	240	0	-	0	No	0	No	0	No	1	0
chr1	217068984	217069386	241	1	+	0.340734	No	0	No	0	No	1	0
chr1	218265177	218265605	243	1	-	0.524071	No	0	No	0	No	1	0
chr1	220971805	220972245	245	0	-	0	No	0	No	0	No	2	0
chr1	221590752	221591200	246	0	+	0	No	0	No	0	No	1	0
chr1	222051008	222051454	247	0	+	0	No	0	No	0	No	1	0
chr1	225456280	225456736	248	2	+	1.22374	No	0	No	0	No	1	0
chr1	226699784	226700188	249	0	-	0	No	0	No	0	No	0	0
chr1	229015093	229015557	251	0	+	0	No	0	No	0	No	1	0
chr1	231569402	231569852	252	1	-	0.287515	No	0.089214	No	0	No	1	0
chr1	232196717	232197076	255	0	-	0	No	0	No	0	No	1	0
chr1	234059698	234060059	257	0	-	0	No	0	No	0	No	1	0
chr1	236919301	236919739	258	0	+	0	No	0.126469	No	0	No	1	0
chr1	239921632	239921994	259	0	+	0	No	0	No	0	No	1	0
chr1	244756998	244757217	262	0	-	0	No	0	No	0	No	0	0
chr1	246256036	246256416	264	0	-	0	No	0	No	0	No	1	1
chr1	246378261	246378654	265	0	+	0	No	0	No	0	No	1	0
chr1	246627853	246628313	268	1	-	0.000539062	No	0	No	0	No	1	0
chr1	247705021	247705462	269	0	-	0	No	0	No	0	No	2	0
chr1	247710056	247710327	270	0	-	0	No	0	No	0	No	2	0
chr2	536386	536824	272	0	+	0	No	0	No	0	No	1	0
chr2	1298679	1299115	273	1	+	0.00040029	No	1.38846	No	0	No	1	0
chr2	2679229	2679681	274	0	+	0	No	0	No	0	No	2	0
chr2	4484112	4484554	275	0	-	0	No	0	No	0	No	2	0
chr2	4490202	4490647	276	0	-	0	No	0	No	0	No	1	0
chr2	4612617	4613003	278	5	-	2.51023	Yes	0	No	0	No	1	0
chr2	4716704	4717148	279	0	+	0	No	0	No	0	No	1	0
chr2	4948443	4948844	280	1	+	0.199176	No	0.633384	No	0	No	1	0
chr2	6141632	6142046	283	0	-	0	No	0	No	0	No	1	0
chr2	6335357	6335782	284	0	-	0	No	0	No	0.120817	No	1	0
chr2	7528036	7528464	285	1	-	0.00050688	No	0	No	0	No	0	0
chr2	10457072	10457514	288	91	-	67.2792	Yes	0	No	0	No	0	0
chr2	10824855	10825243	289	0	+	0	No	0	No	0	No	1	0
chr2	12123397	12123790	292	2	-	0.472935	No	0	No	0	No	1	0
chr2	12166105	12166540	293	0	-	0	No	0	No	0	No	2	0
chr2	12496977	12497368	295	0	-	0	No	0	No	0	No	1	0
chr2	13035433	13035841	296	0	-	0	No	0	No	0	No	1	0
chr2	13218828	13219038	297	0	+	0	No	0	No	0	No	2	0
chr2	13873740	13874128	299	0	-	0	No	0	No	0	No	1	0
chr2	14045043	14045425	300	1	+	0.28148	No	0	No	0	No	1	0
chr2	14345663	14346053	301	0	+	0	No	0	No	0	No	0	0
chr2	14606159	14606543	303	0	+	0	No	0	No	0	No	0	0
chr2	15143647	15144019	305	0	+	0	No	0	No	0	No	1	0
chr2	15574063	15574484	307	0	-	0	No	0	No	0	No	1	1
chr2	16747948	16748383	308	0	-	0	No	0	No	0	No	1	0
chr2	16753970	16754409	309	0	-	0	No	0	No	0	No	2	0
chr2	16905868	16906295	310	0	-	0	No	0	No	0	No	2	0
chr2	17727115	17727593	313	0	+	0	No	0	No	0	No	1	0
chr2	18882065	18882467	314	0	+	0	No	0	No	0	No	1	0
chr2	20904321	20904733	316	0	+	0	No	0	No	0	No	2	1
chr2	22973164	22973614	320	0	+	0	No	0	No	0	No	1	0
chr2	24863108	24863546	321	8	+	3.89127	Yes	0	No	0	No	2	0
chr2	29086072	29086363	323	0	-	0	No	0	No	0	No	0	1
chr2	29938550	29938952	324	0	+	0	No	0	No	0	No	1	0
chr2	31667377	31667769	325	0	+	0	No	0.150059	No	0	No	1	1
chr2	32847209	32847608	327	0	-	0	No	0	No	0	No	0	1
chr2	34433994	34434401	329	0	-	0	No	0	No	0	No	1	0
chr2	36833887	36834348	330	0	+	0	No	0	No	0	No	1	0
chr2	41844878	41845278	331	0	+	0	No	0	No	0	No	1	0
chr2	44632590	44633036	333	1	+	0.00050688	No	0	No	0	No	0	0
chr2	45066185	45066614	334	0	-	0	No	0	No	0	No	2	0
chr2	45291984	45292337	335	0	+	0	No	0	No	0	No	1	0
chr2	47294421	47294832	336	9	+	2.70196	Yes	0	No	0	No	0	0
chr2	47762783	47763229	337	0	-	0	No	0	No	0	No	2	0
chr2	48086458	48086834	338	0	+	0	No	0	No	0	No	1	0
chr2	49542609	49543060	340	5	-	1.22917	Yes	0	No	0	No	0	1
chr2	49548832	49549244	341	25	-	8.82728	Yes	0	No	0	No	1	1
chr2	49659219	49659654	342	15	+	7.81811	Yes	0	No	0	No	1	0
chr2	51611795	51612230	343	0	-	0	No	0	No	0	No	0	0
chr2	52031022	52031431	344	0	-	0	No	0	No	0	No	1	1
chr2	52638462	52638742	345	0	+	0	No	0.150059	No	0	No	0	0
chr2	53090715	53091160	347	108	-	136.599	Yes	0.239273	No	0	No	2	1
chr2	56771807	56772015	348	0	-	0	No	0	No	0	No	0	0
chr2	63070118	63070548	350	74	-	46.6089	Yes	0	No	0	No	2	0
chr2	63761477	63761868	351	0	-	0	No	0	No	0	No	1	0
chr2	68872511	68872953	352	2	+	0.997254	No	0	No	0	No	1	0
chr2	70382887	70383319	353	0	-	0	No	0	No	0	No	1	0
chr2	76326238	76326729	354	2	+	0.025249	No	0	No	0	No	2	0
chr2	77622329	77622778	355	0	-	0	No	0	No	0	No	1	0
chr2	78323573	78323975	357	0	-	0	No	0	No	0	No	1	0
chr2	79361593	79362034	358	0	-	0	No	0	No	0	No	0	0
chr2	79837078	79837519	359	0	-	0	No	0	No	0	No	2	0
chr2	80847539	80847887	361	0	-	0	No	0	No	0	No	1	0
chr2	81710633	81711001	363	0	-	0	No	0	No	0	No	1	0
chr2	83407254	83407630	364	2	+	0.387093	No	0.089214	No	0	No	0	0
chr2	83819223	83819663	366	4	+	2.00295	No	0	No	0	No	0	0
chr2	84673494	84673964	367	0	-	0	No	0	No	0	No	2	0
chr2	85823415	85823803	369	2	-	0.0203949	No	0	No	0	No	2	0
chr2	86993557	86993921	371	0	-	0	No	0	No	0	No	1	1
chr2	87776002	87776366	372	0	+	0	No	0	No	0	No	1	1
chr2	88237286	88237741	374	0	+	0	No	0	No	0	No	1	0
chr2	88401018	88401462	375	9	+	3.7547	Yes	0	No	0	No	2	0
chr2	88533521	88533899	376	2	+	0.447019	No	0	No	0	No	1	0
chr2	91819226	91819611	378	0	+	0	No	0	No	0	No	1	0
chr2	91822912	91823296	380	0	+	0	No	0	No	0	No	2	0
chr2	91823387	91823755	382	0	-	0	No	0	No	0	No	1	0
chr2	92029008	92029376	385	0	+	0	No	0	No	0	No	1	0
chr2	92029467	92029851	387	0	-	0	No	0	No	0	No	2	0
chr2	92033158	92033543	389	0	-	0	No	0	No	0	No	1	0
chr2	94259575	94259943	391	0	+	0	No	0	No	0	No	1	0
chr2	94260047	94260431	393	0	-	0	No	0	No	0	No	2	0
chr2	94263619	94264073	394	0	-	0	No	0	No	0	No	0	0
chr2	97902627	97903063	395	10	+	9.82783	Yes	0	No	0	No	2	1
chr2	100712062	100712433	396	0	+	0	No	0.402996	No	0	No	0	0
chr2	100717231	100717660	398	0	+	0	No	0	No	0	No	1	0
chr2	102908723	102909099	400	0	-	0	No	0	No	0	No	2	0
chr2	102914770	102915165	402	0	-	0	No	0	No	0	No	2	0
chr2	104587542	104587935	405	0	-	0	No	0	No	0	No	1	0
chr2	104593528	104593985	406	0	-	0	No	0	No	0	No	0	0
chr2	106416909	106417273	407	0	+	0	No	0	No	0	No	1	1
chr2	107014521	107014908	409	2	+	0.0100955	No	0	No	0	No	1	0
chr2	107878684	107879048	412	0	-	0	No	0	No	0	No	1	1
chr2	108495687	108496050	414	2	-	0.794312	No	0	No	0	No	1	2
chr2	109843822	109844184	416	0	-	0	No	0	No	0	No	1	2
chr2	110527322	110527684	417	0	+	0	No	0	No	0	No	1	2
chr2	112381881	112382244	419	0	+	0	No	0	No	0	No	1	2
chr2	114593982	114594394	421	0	+	0	No	0	No	0	No	1	0
chr2	122060558	122060937	423	0	-	0	No	0	No	0	No	0	0
chr2	123496309	123496747	424	0	-	0	No	0	No	0	No	2	1
chr2	123500000	123500363	426	0	-	0	No	0	No	0	No	2	0
chr2	123507471	123507854	427	0	+	0	No	0.089214	No	0	No	2	1
chr2	125884983	125885404	428	0	-	0	No	0	No	0	No	0	1
chr2	125895416	125895797	432	0	-	0	No	0	No	0	No	2	0
chr2	126095649	126096039	433	0	+	0	No	0	No	0	No	1	0
chr2	126097925	126098350	435	1	+	2.9523	No	0.126469	No	0	No	1	1
chr2	126551834	126552279	436	0	-	0	No	0	No	0	No	0	0
chr2	126646009	126646415	438	2	-	0.293403	No	0	No	0	No	2	0
chr2	126651983	126652426	439	0	-	0	No	0	No	0	No	1	1
chr2	135377746	135378186	440	0	+	0	No	0	No	0	No	0	0
chr2	138996730	138997110	442	0	-	0	No	0	No	0	No	1	0
chr2	139208197	139208633	443	0	+	0	No	0	No	0	No	1	0
chr2	139214599	139215001	444	0	+	0	No	0	No	0	No	1	0
chr2	142380752	142381176	445	8	-	2.89804	Yes	0	No	0	No	1	1
chr2	146542871	146543173	446	0	-	0	No	0	No	0	No	0	0
chr2	146549436	146549807	449	0	-	0	No	0	No	0	No	1	0
chr2	148345701	148346100	451	3	-	0.00326877	No	0	No	0	No	1	1
chr2	149958874	149959313	452	0	+	0	No	0	No	0	No	2	0
chr2	150461850	150462323	453	1	+	0.000431266	No	0	No	0	No	1	0
chr2	150829935	150830378	454	0	-	0	No	0	No	0	No	0	0
chr2	150836013	150836450	455	2	-	0.0339657	No	0	No	0	No	1	0
chr2	153331392	153331820	456	1	-	0.133283	No	0	No	0	No	2	0
chr2	153411825	153412234	457	0	+	0	No	0	No	0	No	1	0
chr2	154110414	154110795	459	0	-	0	No	0	No	0	No	1	0
chr2	154116850	154117302	460	0	-	0	No	0	No	0	No	2	0
chr2	157654418	157654908	463	1	+	0.00162749	No	0	No	0	No	0	0
chr2	163041557	163042007	464	11	+	4.76673	Yes	0	No	0	No	1	0
chr2	164171802	164172210	465	0	-	0	No	0	No	0	No	1	0
chr2	164866926	164867325	466	7	+	0.681715	Yes	0	No	0	No	2	0
chr2	166413570	166414002	468	10	+	5.45344	Yes	0	No	0	No	2	0
chr2	167943030	167943454	470	0	-	0	No	0	No	0	No	1	0
chr2	168257064	168257455	471	0	+	0	No	0	No	0	No	1	0
chr2	168263450	168263923	473	0	+	0	No	0	No	0	No	0	0
chr2	168760129	168760553	474	1	-	0.00185184	No	0	No	0	No	2	0
chr2	168949710	168950122	475	0	+	0	No	0	No	0	No	1	0
chr2	170613561	170614007	477	0	+	0	No	0.089214	No	0	No	0	0
chr2	172621144	172621574	478	0	+	0	No	0	No	0.120817	No	1	0
chr2	173776661	173777037	480	0	+	0	No	0	No	0	No	1	0
chr2	178809206	178809460	483	0	+	0	No	0	No	0	No	0	0
chr2	180008372	180008786	484	0	+	0	No	0	No	0	No	2	0
chr2	180239320	180239591	488	0	+	0	No	0	No	0	No	0	0
chr2	180926470	180926873	489	0	+	0	No	0	No	0	No	1	0
chr2	182573964	182574378	492	0	-	0	No	0	No	0	No	1	0
chr2	183167012	183167402	494	16	+	7.69751	Yes	0.483325	No	0	No	2	0
chr2	183354813	183355184	498	8	-	0.781042	Yes	0	No	0	No	1	0
chr2	184113054	184113362	499	0	-	0	No	0	No	0	No	1	0
chr2	184782241	184782752	500	1	+	0.0063132	No	0	No	0	No	1	0
chr2	185270985	185271362	501	1	+	0.126745	No	0	No	0	No	2	1
chr2	185367183	185367586	506	0	+	0	No	0	No	0	No	0	0
chr2	185428972	185429418	507	0	+	0	No	0	No	0	No	1	0
chr2	186173868	186174251	508	2	+	0.795213	No	0	No	0	No	1	1
chr2	187178290	187178752	511	0	-	0	No	0	No	0	No	1	0
chr2	187184155	187184613	512	6	-	0.268552	Yes	0	No	0	No	1	1
chr2	188266909	188267326	514	3	-	0.642051	No	0	No	0	No	2	0
chr2	188801604	188802016	515	0	+	0	No	0	No	0	No	0	1
chr2	188804378	188804800	516	0	+	0	No	0	No	0	No	2	0
chr2	188856506	188856918	517	0	-	0	No	0	No	0	No	1	0
chr2	188904477	188904881	519	0	-	0	No	0	No	0	No	1	0
chr2	188910483	188910883	520	48	-	33.599	Yes	0	No	0	No	2	1
chr2	190243030	190243459	521	0	+	0	No	0.150059	No	0	No	1	0
chr2	191909246	191909660	523	0	-	0	No	0	No	0	No	2	1
chr2	194350393	194350774	524	0	+	0	No	0	No	0	No	2	0
chr2	199189020	199189431	527	0	-	0	No	0	No	0	No	0	1
chr2	203668186	203668630	528	10	+	2.98917	Yes	0	No	0	No	2	0
chr2	203881237	203881612	529	0	+	0	No	0	No	0	No	2	0
chr2	206741314	206741754	531	0	+	0	No	0.126469	No	0	No	2	0
chr2	208416582	208417019	532	0	+	0	No	0	No	0	No	1	0
chr2	209121512	209121882	535	0	-	0	No	0	No	0	No	1	0
chr2	209321281	209321709	536	0	-	0	No	0	No	0	No	0	0
chr2	212440122	212440548	537	0	+	0	No	0	No	0	No	2	0
chr2	212446198	212446578	538	16	+	24.1783	Yes	0.450177	No	0	No	2	0
chr2	213377836	213378334	540	0	-	0	No	0	No	0	No	0	0
chr2	213468739	213469150	542	0	-	0	No	0	No	0	No	2	0
chr2	213642405	213642627	544	0	+	0	No	0	No	0	No	1	0
chr2	213642845	213643121	545	0	+	0	No	0.126469	No	0	No	0	0
chr2	213945332	213945730	547	0	-	0	No	0	No	0	No	1	0
chr2	215516802	215517193	548	1	+	0.232405	No	0	No	0	No	1	0
chr2	215606520	215606908	550	0	+	0	No	0	No	0	No	1	0
chr2	220089379	220089761	552	6	+	3.68859	Yes	0	No	0	No	2	1
chr2	220536961	220537342	555	0	-	0	No	0	No	0	No	0	0
chr2	220543406	220543740	556	0	-	0	No	0	No	0	No	0	0
chr2	221343214	221343605	558	0	-	0	No	0	No	0	No	2	1
chr2	222004891	222005275	562	1	-	0.0836582	No	0	No	0	No	2	0
chr2	222435053	222435479	564	0	-	0	No	0	No	0	No	2	0
chr2	223593218	223593644	566	12	-	44.0917	Yes	0	No	0	No	2	0
chr2	226143908	226144317	568	0	-	0	No	0	No	0	No	1	0
chr2	228437445	228437739	569	0	+	0	No	0	No	0	No	2	0
chr2	229430307	229430747	571	0	+	0	No	0	No	0	No	1	0
chr2	230119587	230120015	572	0	+	0	No	0	No	0	No	1	0
chr2	230122600	230122988	573	1	+	0.00329297	No	0	No	0	No	1	0
chr2	231089554	231089995	575	1	-	0.348283	No	0	No	0	No	1	0
chr2	234505617	234506033	576	0	-	0	No	0.535283	No	0	No	1	1
chr2	235328384	235328878	577	1	-	0.0888551	No	0	No	0	No	1	0
chr2	235415093	235415534	578	5	-	0.0361167	Yes	0	No	0	No	2	0
chr2	237084052	237084515	579	0	-	0	No	0	No	0	No	1	0
chr2	237524265	237524700	580	2	-	0.150092	No	0	No	0	No	0	0
chr2	240242384	240242777	582	0	-	0	No	0	No	0	No	1	0
chr3	440358	440755	584	0	-	0	No	0	No	0	No	1	0
chr3	446438	446863	585	0	-	0	No	0	No	0	No	1	0
chr3	929627	930078	586	1	+	1.27668	No	0	No	0	No	1	0
chr3	983863	984256	588	0	-	0	No	0	No	0	No	2	0
chr3	1042965	1043382	590	0	-	0	No	0	No	0	No	1	0
chr3	1927270	1927668	591	0	-	0	No	0	No	0	No	2	0
chr3	3233723	3234038	592	0	+	0	No	0	No	0	No	0	0
chr3	3828164	3828559	595	2	-	0.75896	No	0	No	0	No	2	0
chr3	3834615	3835001	597	0	-	0	No	0.089214	No	0	No	1	0
chr3	3914979	3915205	599	0	+	0	No	0	No	0	No	0	0
chr3	4127290	4127739	601	1	+	0.000533227	No	0	No	0	No	0	0
chr3	4133414	4133860	602	2	+	0.435005	No	0.126469	No	0	No	1	0
chr3	5367471	5367901	603	0	-	0	No	0	No	0	No	1	0
chr3	5976138	5976540	604	18	-	5.09258	Yes	0	No	0	No	2	1
chr3	6008606	6008964	605	0	+	0	No	0	No	0	No	1	0
chr3	6015873	6016090	607	0	+	0	No	0	No	0	No	0	0
chr3	6482469	6482863	609	1	-	0.000177743	No	0	No	0	No	1	0
chr3	8378114	8378494	610	6	+	1.78192	Yes	0	No	0	No	2	0
chr3	13442963	13443405	612	0	-	0	No	0	No	0	No	0	0
chr3	15833083	15833498	613	2	+	0.470427	No	0	No	0	No	1	0
chr3	16804102	16804529	615	0	+	0	No	0	No	0	No	1	1
chr3	17594846	17595278	616	1	+	0.00927711	No	0	No	0	No	1	0
chr3	18521643	18522067	617	0	+	0	No	0	No	0	No	1	0
chr3	18827322	18827714	619	1	-	0.00050688	No	0	No	0	No	1	0
chr3	18941801	18942254	620	1	+	0.00911036	No	0	No	0	No	2	0
chr3	19045578	19045885	622	2	-	0.156631	No	0	No	0	No	1	1
chr3	19864823	19865208	624	0	-	0	No	0	No	0	No	1	0
chr3	20443534	20443968	625	2	+	0.379839	No	0	No	0	No	2	0
chr3	20871638	20872007	628	0	+	0	No	0	No	0	No	0	0
chr3	20877846	20878286	630	1	+	0.001036	No	0	No	0	No	0	0
chr3	22023928	22024387	631	5	+	2.81725	Yes	0	No	0	No	2	0
chr3	22029868	22030256	632	0	+	0	No	0.126469	No	0	No	1	0
chr3	22255831	22256294	634	0	+	0	No	0.126469	No	0	No	1	0
chr3	22853048	22853484	635	1	+	0.085208	No	0	No	0	No	1	0
chr3	25804876	25805229	637	7	-	2.56964	Yes	0	No	0	No	2	0
chr3	27224966	27225410	638	4	-	0.0137387	No	0	No	0	No	1	0
chr3	28439146	28439556	640	0	-	0	No	0	No	0	No	1	0
chr3	28642103	28642529	642	0	-	0	No	0	No	0	No	1	0
chr3	35142665	35143062	644	0	-	0	No	0	No	0	No	1	1
chr3	36465580	36466014	645	5	-	0.0638671	Yes	0	No	0	No	2	1
chr3	39336851	39337297	646	0	+	0	No	0.150059	No	0	No	1	0
chr3	40125195	40125617	647	0	-	0	No	0.089214	No	0	No	1	0
chr3	40591391	40591826	648	0	-	0	No	0	No	0	No	0	0
chr3	40704717	40705095	649	0	+	0	No	0	No	0	No	2	0
chr3	41311185	41311568	650	1	+	0.00040029	No	0	No	0	No	1	0
chr3	45300077	45300638	652	0	-	0	No	0	No	0	No	0	1
chr3	45785230	45785613	653	0	+	0	No	0	No	0	No	0	0
chr3	46816108	46816554	655	1	-	0.00191163	No	0.126469	No	0	No	0	0
chr3	48003688	48004124	656	0	+	0	No	0	No	0	No	0	0
chr3	48010617	48011040	657	4	+	0.186572	No	0	No	0	No	0	0
chr3	51126961	51127351	658	0	-	0	No	0	No	0	No	1	0
chr3	55260343	55260736	659	0	+	0	No	0	No	0	No	1	1
chr3	57869036	57869451	662	0	-	0	No	0	No	0	No	1	1
chr3	59915984	59916526	663	0	+	0	No	0	No	0	No	0	0
chr3	62595687	62596088	664	11	+	4.59409	Yes	0	No	0	No	1	0
chr3	67833949	67834380	668	1	+	0.08806	No	0	No	0	No	2	1
chr3	67838001	67838437	669	1	+	0.281597	No	0	No	0	No	2	0
chr3	69356176	69356615	670	0	+	0	No	0	No	0	No	1	0
chr3	69976600	69976992	672	0	+	0	No	0	No	0	No	1	0
chr3	69982717	69983100	674	2	+	0.036186	No	0	No	0	No	2	0
chr3	71980381	71980599	678	0	-	0	No	0	No	0	No	2	1
chr3	72195253	72195682	679	0	-	0	No	0	No	0	No	0	1
chr3	73646837	73647275	680	0	+	0	No	0	No	0	No	1	0
chr3	74837021	74837473	681	0	-	0	No	0	No	0	No	2	0
chr3	74948032	74948424	682	0	+	0	No	0	No	0	No	1	0
chr3	76502946	76503427	684	0	-	0	No	0	No	0	No	0	0
chr3	77722987	77723334	685	0	-	0	No	0	No	0	No	1	0
chr3	77731192	77731581	687	1	-	0.149528	No	0	No	0	No	2	0
chr3	77736629	77737070	688	0	-	0	No	0	No	0	No	2	0
chr3	78107984	78108207	689	0	-	0	No	0	No	0	No	0	0
chr3	78109637	78109838	690	1	-	0.038193	No	0	No	0	No	1	0
chr3	78229317	78229769	691	10	+	6.12045	Yes	0	No	0	No	1	0
chr3	78553381	78553764	693	0	+	0	No	0	No	0	No	1	1
chr3	79046450	79046878	695	0	-	0	No	0	No	0	No	1	1
chr3	80581929	80582370	696	2	-	0.22754	No	0	No	0	No	2	0
chr3	81176063	81176538	697	0	-	0	No	0	No	0	No	1	0
chr3	81352347	81352729	698	2	+	0.000970328	No	0	No	0	No	0	0
chr3	81699437	81699869	700	9	-	4.41358	Yes	0.089214	No	0	No	0	1
chr3	82761482	82761927	701	0	-	0	No	0	No	0	No	1	0
chr3	83473194	83473620	702	0	+	0	No	0	No	0	No	0	0
chr3	84465712	84466024	704	0	+	0	No	0	No	0	No	1	0
chr3	84471779	84472191	706	0	+	0	No	0	No	0	No	2	0
chr3	86429640	86430076	708	2	+	3.18734	No	0	No	0	No	1	0
chr3	87157220	87157669	709	0	+	0	No	0	No	0	No	1	0
chr3	89540674	89540948	710	0	+	0	No	0	No	0	No	1	0
chr3	89982570	89982851	712	0	+	0	No	0.126469	No	0	No	0	0
chr3	91354017	91354411	714	0	-	0	No	0	No	0	No	2	0
chr3	91357411	91357765	715	0	-	0	No	0	No	0	No	0	0
chr3	94729718	94730135	716	1	-	0.441079	No	0	No	0	No	1	0
chr3	94830332	94830791	717	0	-	0	No	0	No	0	No	2	0
chr3	97541838	97542094	718	0	-	0	No	0	No	0	No	0	0
chr3	97773025	97773471	719	0	-	0	No	0	No	0	No	1	0
chr3	97775205	97775656	720	1	-	0.0424662	No	0	No	0	No	2	0
chr3	98631866	98632313	722	0	-	0	No	0	No	0	No	1	0
chr3	98953154	98953556	723	20	+	14.9594	Yes	0	No	0	No	2	1
chr3	99123454	99123891	725	15	-	9.56019	Yes	0	No	0	No	2	0
chr3	99263673	99264067	728	0	-	0	No	0	No	0	No	0	0
chr3	101527538	101528001	729	6	+	2.2297	Yes	0	No	0	No	1	0
chr3	102632895	102633271	731	4	-	4.59958	No	0	No	0	No	1	0
chr3	103594501	103594936	732	0	-	0	No	0	No	0	No	1	0
chr3	103600585	103601017	733	0	-	0	No	0	No	0	No	1	0
chr3	104105521	104105973	734	0	-	0	No	0	No	0	No	2	0
chr3	104773478	104773918	735	4	+	0.815453	No	0	No	0	No	1	0
chr3	105601137	105601544	737	0	-	0	No	0	No	0	No	0	0
chr3	105607165	105607582	740	0	-	0	No	0	No	0	No	0	0
chr3	106573006	106573433	742	3	-	0.00887086	No	0	No	0	No	0	0
chr3	107859327	107859787	743	3	+	1.86672	No	0	No	0	No	0	0
chr3	108147788	108148266	744	3	-	0.00334813	No	0	No	0	No	1	1
chr3	110022814	110023039	745	0	+	0	No	0	No	0	No	1	0
chr3	111814117	111814498	746	0	+	0	No	0	No	0.120817	No	1	0
chr3	111935543	111935944	748	1	-	0.000539062	No	0	No	0	No	1	0
chr3	112700649	112700907	749	1	+	0.00159116	No	0	No	0	No	2	0
chr3	113320588	113320991	750	0	-	0	No	0	No	0	No	1	0
chr3	115231233	115231622	751	0	+	0	No	0	No	0	No	1	0
chr3	115792782	115793165	752	1	+	0.00589404	No	0.126469	No	0.079143	No	2	0
chr3	116572121	116572518	753	3	+	0.0102503	No	0.126469	No	0	No	0	0
chr3	116578062	116578479	754	8	+	8.25497	Yes	0	No	0	No	2	0
chr3	118145765	118146201	755	0	-	0	No	0	No	0	No	1	0
chr3	118364156	118364569	757	2	-	0.482336	No	0	No	0	No	2	0
chr3	124623428	124623800	759	0	-	0	No	0	No	0	No	1	0
chr3	131415543	131415991	761	0	+	0	No	0	No	0	No	1	0
chr3	131604384	131604823	762	1	+	5.70449	No	0	No	0	No	0	1
chr3	132846640	132847036	765	0	-	0	No	0	No	0	No	1	0
chr3	132868522	132868757	766	0	+	0	No	0	No	0	No	1	0
chr3	134147914	134148406	769	0	+	0	No	0	No	0	No	0	0
chr3	135744104	135744545	770	4	+	0.0230381	No	0	No	0	No	2	0
chr3	139738288	139738659	771	3	+	0.382797	No	0	No	0	No	1	0
chr3	140353187	140353642	773	2	-	0.0430156	No	0	No	0	No	1	0
chr3	141272536	141272979	774	0	-	0	No	0	No	0	No	1	0
chr3	141884453	141884776	775	1	+	0.000846591	No	0	No	0.079143	No	1	0
chr3	142766160	142766394	777	0	+	0	No	0	No	0	No	0	0
chr3	142766680	142766886	778	0	+	0	No	0	No	0	No	0	0
chr3	143920675	143921063	780	0	-	0	No	0	No	0	No	1	1
chr3	144204096	144204521	782	0	-	0	No	0	No	0	No	1	0
chr3	144210211	144210621	784	0	-	0	No	0	No	0	No	1	0
chr3	144504508	144504944	785	7	-	1.81386	Yes	0	No	0	No	1	0
chr3	144508415	144508828	787	0	-	0	No	0	No	0	No	2	1
chr3	145053543	145053982	788	50	-	33.3857	Yes	0	No	0	No	1	1
chr3	145230596	145231003	790	0	-	0	No	0	No	0	No	0	0
chr3	146269409	146269855	791	7	-	3.36737	Yes	0	No	0	No	1	0
chr3	146332547	146332790	792	0	-	0	No	0	No	0	No	0	0
chr3	146936982	146937445	793	0	+	0	No	0	No	0	No	1	0
chr3	147047436	147047828	794	0	+	0	No	0	No	0	No	1	0
chr3	147719505	147719933	796	8	+	1.34639	Yes	0	No	0	No	1	0
chr3	147725590	147725815	797	0	+	0	No	0	No	0	No	1	1
chr3	148545694	148546099	799	0	-	0	No	0	No	0	No	1	0
chr3	151030361	151030764	800	0	+	0	No	0	No	0	No	1	0
chr3	151419190	151419631	802	0	-	0	No	0	No	0	No	1	0
chr3	151854207	151854635	803	0	-	0	No	0	No	0	No	0	0
chr3	152697998	152698437	804	0	+	0	No	0	No	0	No	2	0
chr3	156789164	156789603	805	1	+	0.0517858	No	0	No	0	No	1	0
chr3	157588009	157588227	807	0	+	0	No	0	No	0	No	0	0
chr3	159316146	159316584	809	9	-	3.15764	Yes	0	No	0	No	2	1
chr3	159545183	159545583	810	0	+	0	No	0	No	0	No	2	0
chr3	160141157	160141591	811	3	+	1.07253	No	0	No	0	No	2	0
chr3	161744408	161744817	812	3	+	0.68676	No	0	No	0	No	1	0
chr3	163060194	163060576	817	3	-	0.760778	No	0	No	0	No	1	0
chr3	163423162	163423591	818	0	-	0	No	0	No	0	No	1	0
chr3	163425882	163426281	819	0	-	0	No	0	No	0	No	1	1
chr3	164208861	164209260	822	5	+	1.03665	Yes	0	No	0	No	2	0
chr3	164299698	164300153	824	0	-	0	No	0	No	0	No	1	0
chr3	164415028	164415409	825	17	+	15.2917	Yes	0	No	0	No	1	1
chr3	164804656	164805055	826	1	-	0.000706973	No	0	No	0	No	0	0
chr3	165529864	165530214	828	0	+	0	No	0	No	0.079143	No	1	0
chr3	165531831	165532275	829	0	-	0	No	0	No	0	No	0	0
chr3	165997808	165998129	830	0	-	0	No	0	No	0	No	0	0
chr3	166002818	166003219	831	0	-	0	No	0	No	0	No	1	0
chr3	166886802	166887238	832	0	-	0	No	0	No	0	No	0	0
chr3	166987951	166988289	834	1	-	0.00156352	No	0	No	0	No	0	0
chr3	166990107	166990625	835	18	-	9.34561	Yes	0	No	0	No	2	0
chr3	166995711	166996077	836	1	+	0.0223956	No	0	No	0	No	1	0
chr3	174395587	174396006	840	1	+	1.49182	No	0	No	0	No	1	0
chr3	174397226	174397619	841	6	+	0.758012	Yes	0	No	0	No	0	0
chr3	174882918	174883323	844	0	-	0	No	0	No	0	No	1	0
chr3	174886212	174886520	846	0	-	0	No	0	No	0	No	2	0
chr3	175528122	175528576	847	12	-	3.78015	Yes	0	No	0	No	1	0
chr3	175534227	175534485	848	0	-	0	No	0	No	0	No	0	0
chr3	177532035	177532484	849	3	+	0.0104839	No	0	No	0	No	0	1
chr3	179994614	179995058	850	0	+	0	No	0.126469	No	0	No	0	0
chr3	180000925	180001424	851	0	+	0	No	0	No	0	No	0	0
chr3	180321887	180322145	852	0	-	0	No	0	No	0	No	0	0
chr3	186698135	186698513	855	0	-	0	No	0	No	0	No	0	0
chr3	187514886	187515311	857	0	-	0	No	0	No	0	No	1	0
chr3	190164247	190164620	859	1	-	2.30036	No	0	No	0	No	1	0
chr3	190250724	190251109	861	0	-	0	No	0	No	0	No	1	0
chr3	190370639	190371031	862	0	+	0	No	0	No	0	No	0	0
chr3	193928350	193928783	865	0	+	0	No	0	No	0.120817	No	2	0
chr4	1271556	1271980	867	0	-	0	No	0	No	0	No	1	1
chr4	1373188	1373540	868	2	-	1.61514	No	0	No	0	No	1	0
chr4	2400516	2400947	869	1	-	0.00117961	No	0	No	0	No	2	0
chr4	2741100	2741531	870	0	+	0	No	0	No	0	No	0	0
chr4	3453907	3454348	871	0	+	0	No	0	No	0	No	1	0
chr4	4253465	4253873	873	0	+	0	No	0	No	0	No	1	0
chr4	6247254	6247693	875	0	-	0	No	0	No	0	No	0	0
chr4	6877437	6877888	876	1	-	0.000795493	No	0	No	0	No	1	0
chr4	10129109	10129442	880	0	-	0	No	0	No	0	No	0	0
chr4	10482427	10482897	881	0	-	0	No	0	No	0	No	1	0
chr4	11001423	11001903	882	3	+	0.430557	No	0	No	0	No	2	1
chr4	12386686	12386950	885	0	-	0	No	0	No	0	No	0	0
chr4	12389608	12389960	886	0	-	0	No	0	No	0	No	1	0
chr4	12828651	12829056	888	0	+	0	No	0	No	0	No	2	0
chr4	13179110	13179528	889	1	-	0.248054	No	0	No	0	No	1	0
chr4	13226988	13227379	890	0	+	0	No	0	No	0	No	1	0
chr4	14341003	14341433	892	1	-	0.0171987	No	0	No	0	No	2	0
chr4	17019796	17020201	893	0	+	0	No	0	No	0	No	2	1
chr4	19142630	19143035	895	0	+	0	No	0	No	0	No	1	0
chr4	20108790	20109211	898	0	+	0	No	0	No	0	No	2	0
chr4	20219877	20220245	901	0	-	0	No	0	No	0	No	1	0
chr4	20673315	20673732	902	0	+	0	No	0	No	0	No	1	0
chr4	21519915	21520291	906	0	-	0	No	0.239273	No	0	No	0	0
chr4	22776563	22776974	908	1	-	0.00204193	No	0	No	0	No	1	0
chr4	22813259	22813765	909	2	+	0.264952	No	0	No	0	No	1	0
chr4	23463657	23464047	911	1	-	0.0312703	No	0	No	0	No	2	0
chr4	23469688	23470134	912	1	-	0.000177743	No	0	No	0	No	2	0
chr4	23971379	23971827	913	0	-	0	No	0	No	0	No	1	0
chr4	24400147	24400597	914	1	+	0.000706973	No	0.089214	No	0	No	2	0
chr4	24600451	24600886	915	0	+	0	No	0	No	0	No	1	0
chr4	24749516	24749954	916	0	-	0	No	0	No	0.120817	No	1	1
chr4	26501655	26502098	917	0	-	0	No	0	No	0	No	0	0
chr4	27949298	27949660	918	0	-	0	No	0	No	0	No	1	1
chr4	28011820	28012233	919	0	-	0	No	0	No	0	No	0	0
chr4	29611378	29611763	921	2	+	0.347898	No	0.736263	No	0	No	1	0
chr4	29755955	29756352	923	1	+	0.00146167	No	0	No	0	No	1	0
chr4	29784303	29784749	924	0	-	0	No	0	No	0	No	0	0
chr4	30332951	30333307	925	0	+	0	No	0	No	0	No	0	0
chr4	31501328	31501795	927	2	+	1.08164	No	0	No	0	No	1	0
chr4	31507425	31507816	928	2	+	0.809068	No	0.089214	No	0	No	1	0
chr4	31543832	31544204	930	0	+	0	No	0	No	0	No	0	0
chr4	31832973	31833349	931	0	-	0	No	0	No	0	No	0	0
chr4	32806397	32806806	932	0	+	0	No	0	No	0	No	0	0
chr4	33143120	33143669	934	0	-	0	No	0	No	0	No	0	0
chr4	35201744	35202148	935	0	+	0	No	0	No	0	No	2	0
chr4	35209482	35209884	936	0	+	0	No	0	No	0	No	1	0
chr4	35338846	35339245	938	0	+	0	No	0	No	0	No	1	0
chr4	35345165	35345600	939	0	+	0	No	0	No	0	No	1	0
chr4	35711422	35711816	940	0	-	0	No	0	No	0	No	1	0
chr4	36611544	36612006	941	0	+	0	No	0	No	0	No	2	0
chr4	36614126	36614500	942	0	+	0	No	0	No	0	No	0	0
chr4	36714491	36714868	944	2	-	0.0148062	No	0	No	0	No	2	1
chr4	36720690	36720966	946	0	-	0	No	0	No	0	No	4	0
chr4	36800757	36801164	947	2	-	0.00917467	No	0	No	0	No	1	0
chr4	36970660	36971086	948	6	-	1.01193	Yes	0	No	0	No	1	0
chr4	37565728	37566168	949	0	+	0	No	0	No	0	No	1	0
chr4	39929154	39929519	950	0	+	0	No	0	No	0	No	3	0
chr4	42526338	42526768	952	2	+	0.697679	No	0	No	0	No	1	0
chr4	42752915	42753346	953	0	-	0	No	0	No	0	No	2	0
chr4	42820688	42821115	954	0	-	0	No	0	No	0	No	0	1
chr4	43445445	43445831	956	0	-	0	No	0	No	0	No	0	0
chr4	43452815	43453213	957	0	-	0	No	0	No	0	No	1	0
chr4	44973550	44973950	958	0	+	0	No	0	No	0	No	1	0
chr4	45288026	45288410	960	13	+	5.86972	Yes	0.178428	No	0	No	2	0
chr4	46156610	46157046	962	0	+	0	No	0	No	0	No	1	0
chr4	46159442	46159875	963	0	+	0	No	0.089214	No	0	No	0	0
chr4	46485514	46485943	964	8	+	3.86274	Yes	0	No	0	No	2	0
chr4	46636946	46637428	965	0	-	0	No	0	No	0	No	1	0
chr4	48301643	48302087	966	3	-	1.56946	No	0	No	0	No	1	0
chr4	53235996	53236364	967	1	+	0.0500027	No	0	No	0	No	1	0
chr4	54422427	54422893	970	0	+	0	No	0	No	0	No	1	0
chr4	55201780	55202226	971	0	+	0	No	0	No	0	No	0	0
chr4	58059378	58059797	972	3	+	1.36006	No	0	No	0	No	1	1
chr4	59013884	59014286	973	0	+	0	No	0	No	0	No	2	0
chr4	59452420	59452860	975	0	+	0	No	0	No	0	No	2	0
chr4	59545998	59546394	977	0	-	0	No	0	No	0	No	1	0
chr4	59909020	59909441	978	0	+	0	No	0	No	0	No	1	0
chr4	59915101	59915469	979	0	+	0	No	0	No	0	No	1	0
chr4	59952257	59952661	982	0	-	0	No	0	No	0	No	2	0
chr4	60487177	60487614	983	2	+	0.00172493	No	0	No	0	No	2	0
chr4	61130639	61131019	985	0	-	0	No	0	No	0	No	1	0
chr4	62586627	62587030	986	0	+	0	No	0	No	0	No	1	0
chr4	62688943	62689343	988	0	-	0	No	0.089214	No	0	No	0	0
chr4	63200521	63200725	989	0	+	0	No	0	No	0	No	1	0
chr4	63705755	63706166	992	0	-	0	No	0	No	0	No	1	1
chr4	64672071	64672448	993	6	-	0.0126046	Yes	0	No	0	No	0	0
chr4	64678088	64678541	994	0	-	0	No	0	No	0	No	0	1
chr4	64939236	64939624	997	0	-	0	No	0	No	0	No	1	0
chr4	66510489	66510973	1000	5	-	4.1126	Yes	0	No	0	No	2	0
chr4	70390600	70391000	1001	2	+	0.479939	No	0	No	0	No	2	1
chr4	71153040	71153419	1004	0	-	0	No	0	No	0	No	1	0
chr4	72074988	72075401	1005	0	+	0	No	0	No	0	No	1	0
chr4	72254045	72254483	1006	0	+	0	No	0	No	0	No	1	0
chr4	73856987	73857392	1007	1	+	1.43766	No	0	No	0	No	2	0
chr4	76914811	76915192	1011	25	-	8.91059	Yes	0	No	0	No	1	1
chr4	78420928	78421155	1013	0	-	0	No	0	No	0	No	0	0
chr4	79443776	79444227	1016	0	-	0	No	0	No	0	No	0	0
chr4	79730217	79730634	1017	0	+	0	No	0	No	0	No	2	0
chr4	80174514	80174935	1019	27	-	10.6336	Yes	0	No	0	No	1	0
chr4	80180343	80180735	1020	2	-	0.5191	No	0	No	0	No	1	0
chr4	80793128	80793514	1022	0	-	0	No	0	No	0	No	1	0
chr4	80800782	80801179	1023	0	-	0	No	0	No	0	No	1	0
chr4	81097970	81098389	1024	0	+	0	No	0	No	0	No	1	0
chr4	83360257	83360686	1025	0	+	0	No	0	No	0	No	0	0
chr4	83669904	83670337	1026	0	+	0	No	0	No	0	No	1	0
chr4	84102293	84102747	1027	11	+	9.47912	Yes	0.252937	No	0	No	2	1
chr4	86377799	86378105	1029	0	-	0	No	0	No	0	No	2	0
chr4	90812007	90812390	1032	0	-	0	No	0	No	0	No	1	0
chr4	91888712	91889109	1033	0	+	0	No	0	No	0	No	2	0
chr4	91894549	91894977	1035	0	+	0	No	0	No	0	No	2	0
chr4	92008890	92009284	1037	1	+	8.07818	No	0	No	0	No	1	0
chr4	92405820	92406257	1040	0	-	0	No	0	No	0	No	1	0
chr4	94509558	94509995	1041	1	-	0.0079496	No	0	No	0	No	1	0
chr4	94846309	94846707	1042	4	+	0.572658	No	0	No	0	No	2	0
chr4	95256659	95257135	1044	0	-	0	No	0	No	0	No	1	0
chr4	96361324	96361718	1045	1	+	0.0200862	No	0	No	0	No	1	1
chr4	96930538	96930978	1046	0	+	0	No	0	No	0	No	1	0
chr4	97379683	97380138	1047	0	+	0	No	0	No	0	No	1	0
chr4	97703815	97704229	1051	0	-	0	No	0	No	0	No	0	0
chr4	98463068	98463508	1052	0	+	0	No	0	No	0	No	1	0
chr4	98942773	98943177	1053	66	+	49.4914	Yes	0	No	0	No	1	0
chr4	101615061	101615504	1055	1	-	0.311335	No	0	No	0	No	1	1
chr4	102394254	102394672	1056	1	+	0.00551564	No	0	No	0	No	1	0
chr4	102396957	102397381	1057	0	+	0	No	0	No	0	No	1	0
chr4	104356170	104356585	1058	0	+	0	No	0	No	0	No	1	0
chr4	105545585	105545866	1061	0	-	0	No	0	No	0	No	1	0
chr4	107142028	107142425	1063	0	-	0	No	0	No	0	No	1	0
chr4	107668390	107668856	1064	0	+	0	No	0	No	0	No	0	0
chr4	107722788	107723214	1065	0	-	0	No	0	No	0	No	1	0
chr4	107730907	107731396	1066	0	-	0	No	0	No	0	No	1	0
chr4	108750109	108750490	1067	1	+	0.000731164	No	0.126469	No	0	No	1	1
chr4	109018968	109019339	1069	2	+	1.47634	No	0	No	0	No	1	0
chr4	110884761	110885167	1072	0	-	0	No	0	No	0	No	2	0
chr4	112465095	112465476	1074	19	-	4.78297	Yes	0	No	0	No	1	0
chr4	113862606	113863001	1076	12	+	1.31173	Yes	0	No	0	No	2	0
chr4	113924121	113924504	1078	2	-	0.0975094	No	0	No	0	No	1	0
chr4	113930127	113930536	1079	3	-	1.29181	No	0	No	0	No	2	1
chr4	115460080	115460478	1083	1	-	0.716218	No	0	No	0	No	1	0
chr4	116649203	116649462	1084	0	+	0	No	0	No	0	No	0	0
chr4	117288821	117289114	1085	0	+	0	No	0	No	0.120817	No	0	0
chr4	119776256	119776681	1086	0	+	0	No	0	No	0	No	1	0
chr4	120219568	120220035	1087	5	+	1.03452	Yes	0.595087	No	0	No	2	1
chr4	121359248	121359666	1088	8	+	1.27061	Yes	0	No	0	No	2	1
chr4	121512586	121512965	1091	1	-	0.00382104	No	0	No	0	No	1	0
chr4	123166086	123166488	1092	16	+	6.00038	Yes	0	No	0	No	1	0
chr4	123653631	123654029	1093	0	-	0	No	0	No	0	No	0	0
chr4	124471074	124471512	1095	0	+	0	No	0	No	0	No	1	0
chr4	124476642	124477064	1096	40	+	24.5434	Yes	0	No	0	No	2	0
chr4	125595181	125595619	1097	2	-	0.0339703	No	0	No	0	No	2	0
chr4	126040991	126041420	1098	0	+	0	No	0	No	0	No	1	0
chr4	126826146	126826536	1099	0	+	0	No	0	No	0	No	1	0
chr4	128611704	128612139	1101	0	+	0	No	0	No	0	No	2	0
chr4	130512012	130512415	1102	0	-	0	No	0	No	0	No	0	0
chr4	131465039	131465439	1103	1	+	0.0422708	No	0	No	0	No	1	0
chr4	132107517	132107740	1105	0	-	0	No	0	No	0	No	0	0
chr4	132114555	132114957	1107	5	-	0.707178	Yes	0	No	0	No	0	0
chr4	132351061	132351456	1108	1	-	0.249748	No	0	No	0	No	2	0
chr4	132357078	132357402	1109	0	-	0	No	0	No	0	No	1	0
chr4	133608675	133609118	1111	0	-	0	No	0	No	0	No	0	0
chr4	134311641	134312142	1112	0	+	0	No	0	No	0	No	2	0
chr4	135035958	135036341	1113	0	+	0	No	0	No	0	No	1	0
chr4	135039660	135040038	1115	0	-	0	No	0	No	0	No	1	0
chr4	135042369	135042814	1116	0	+	0	No	0	No	0	No	1	0
chr4	135403947	135404388	1117	0	+	0	No	0	No	0	No	0	0
chr4	135416622	135417048	1118	0	+	0	No	0	No	0	No	1	0
chr4	136455257	136455616	1120	0	+	0	No	0	No	0	No	0	0
chr4	138582125	138582574	1121	0	+	0	No	0	No	0	No	0	0
chr4	138691888	138692268	1123	0	-	0	No	0	No	0	No	2	0
chr4	144915444	144915893	1124	15	-	17.8158	Yes	0	No	0	No	1	0
chr4	145028089	145028526	1125	0	+	0	No	0	No	0	No	1	1
chr4	145034139	145034543	1126	2	+	0.834402	No	113.25	Yes	0	No	2	1
chr4	145793341	145793725	1130	3	-	0.00411212	No	0.126469	No	0	No	2	0
chr4	146160619	146161002	1131	6	+	0.0133638	Yes	0	No	0	No	2	0
chr4	149038741	149039169	1133	3	+	1.34675	No	0	No	0	No	1	0
chr4	149046249	149046697	1134	0	+	0	No	0	No	0	No	2	0
chr4	149564432	149564864	1136	0	+	0	No	0	No	0	No	1	0
chr4	149626000	149626405	1137	0	+	0	No	0	No	0	No	0	0
chr4	149860731	149861144	1139	1	-	0.135935	No	0	No	0	No	2	0
chr4	153672903	153673302	1140	0	+	0	No	0	No	0	No	2	0
chr4	156488653	156489034	1143	0	+	0	No	0	No	0	No	1	0
chr4	156491896	156492314	1145	4	+	0.776545	No	0	No	0	No	0	0
chr4	157780934	157781292	1149	0	-	0	No	0	No	0	No	1	0
chr4	159396577	159397079	1150	0	+	0	No	0	No	0	No	0	0
chr4	159786162	159786556	1151	0	+	0	No	0	No	0	No	1	0
chr4	160325446	160325826	1154	1	-	0.00192318	No	0	No	0	No	1	1
chr4	162254945	162255194	1155	0	+	0	No	0	No	0	No	0	0
chr4	162696478	162696883	1158	0	-	0	No	0	No	0	No	1	0
chr4	162736045	162736372	1159	1	+	0.0511249	No	0	No	0	No	1	0
chr4	162757638	162758079	1160	43	+	50.3565	Yes	0	No	0	No	1	0
chr4	162956464	162956870	1161	8	+	0.133596	Yes	0	No	0	No	2	0
chr4	164254564	164254959	1163	1	-	0.326636	No	0	No	0	No	2	1
chr4	165521587	165522054	1164	0	-	0	No	0	No	0	No	0	0
chr4	166322196	166322638	1165	1	-	0.0190965	No	0	No	0	No	1	0
chr4	167922337	167922785	1166	0	-	0	No	0	No	0	No	2	0
chr4	169316550	169316989	1167	3	+	0.00447458	No	0	No	0	No	1	0
chr4	169327208	169327642	1168	0	+	0	No	0	No	0	No	2	0
chr4	170595868	170596323	1169	0	+	0	No	0	No	0	No	1	0
chr4	170905437	170905812	1170	2	+	0.176892	No	0.239273	No	0	No	2	0
chr4	171721073	171721308	1172	7	-	0.277281	Yes	0	No	0	No	2	1
chr4	171881417	171881646	1173	2	-	0.833891	No	0	No	0.120817	No	2	0
chr4	174979309	174979694	1177	1	-	1.95173	No	0	No	0	No	2	0
chr4	174993035	174993529	1178	4	-	0.98964	No	0	No	0	No	2	0
chr4	176472112	176472554	1179	0	-	0	No	0	No	0	No	0	1
chr4	177199411	177199840	1180	0	-	0	No	0	No	0	No	1	1
chr4	177997008	177997390	1182	1	-	0.343492	No	0	No	0	No	2	1
chr4	178252521	178252916	1183	0	-	0	No	0	No	0	No	1	0
chr4	179299538	179299914	1185	1	-	0.178092	No	0	No	0	No	1	0
chr4	180187982	180188238	1186	0	-	0	No	0	No	0	No	2	0
chr4	187381739	187382125	1188	0	-	0	No	0	No	0	No	0	0
chr4	188307140	188307602	1189	0	-	0	No	0	No	0	No	0	0
chr4	188889979	188890460	1190	0	-	0	No	0	No	0	No	1	0
chr4	189293212	189293601	1191	0	-	0	No	0	No	0	No	1	0
chr5	918576	919018	1192	3	-	0.0640617	No	0	No	0	No	1	0
chr5	2226673	2227079	1195	0	+	0	No	0	No	0	No	0	0
chr5	3947659	3948099	1197	10	-	2.49585	Yes	0	No	0	No	1	1
chr5	3953766	3954207	1198	1	-	0.61124	No	0	No	0	No	2	1
chr5	3971433	3971804	1200	0	-	0	No	0	No	0	No	1	0
chr5	4458895	4459290	1201	0	+	0	No	0	No	0	No	1	0
chr5	4465252	4465702	1202	1	+	1.04632	No	0	No	0	No	2	0
chr5	4895169	4895528	1205	0	-	0	No	0	No	0	No	0	0
chr5	5809910	5810330	1206	0	+	0	No	0	No	0	No	0	0
chr5	6569608	6570026	1208	0	+	0	No	0	No	0	No	0	0
chr5	6931113	6931553	1210	0	+	0	No	0	No	0	No	2	0
chr5	10142727	10143105	1211	0	+	0	No	0	No	0	No	1	0
chr5	10338271	10338725	1213	0	+	0	No	0	No	0	No	1	0
chr5	10716383	10716832	1214	2	+	0.0287995	No	0	No	0	No	1	0
chr5	10722105	10722498	1215	1	+	0.0194418	No	0	No	0	No	1	0
chr5	13149534	13149920	1217	0	-	0	No	0	No	0	No	1	1
chr5	13195742	13195963	1219	0	+	0	No	0.089214	No	0	No	0	0
chr5	13201526	13201914	1220	2	+	0.00210697	No	0	No	0	No	2	0
chr5	13517101	13517490	1222	0	+	0	No	0	No	0	No	1	0
chr5	14804987	14805385	1224	0	+	0	No	0	No	0	No	1	0
chr5	15058113	15058414	1226	0	+	0	No	0	No	0	No	0	0
chr5	15064015	15064463	1227	0	+	0	No	0	No	0	No	1	0
chr5	16765126	16765534	1228	0	+	0	No	0	No	0	No	0	1
chr5	17967790	17968199	1230	1	-	0.00040029	No	0	No	0	No	0	0
chr5	18072273	18072716	1231	0	+	0	No	0	No	0	No	1	0
chr5	19755626	19756020	1234	0	-	0	No	0.178428	No	0	No	1	0
chr5	20175663	20175958	1236	0	-	0	No	0	No	0	No	0	0
chr5	20341119	20341510	1237	0	+	0	No	0	No	0	No	1	0
chr5	20825029	20825424	1239	0	-	0	No	0	No	0	No	2	0
chr5	20980468	20980884	1240	0	-	0	No	0	No	0	No	1	0
chr5	21169748	21170156	1242	0	-	0	No	0	No	0	No	1	0
chr5	21437569	21438021	1243	0	+	0	No	0	No	0	No	1	0
chr5	22963874	22964316	1244	0	-	0	No	0	No	0	No	2	0
chr5	23804137	23804535	1245	0	+	0	No	0	No	0	No	1	0
chr5	24083119	24083514	1246	5	+	3.1478	Yes	0.126469	No	0	No	1	1
chr5	24757763	24758143	1248	0	+	0	No	0	No	0	No	2	0
chr5	24958524	24958953	1252	6	-	4.88918	Yes	0	No	0	No	2	0
chr5	26103880	26104301	1253	2	-	1.7228	No	0	No	0	No	2	1
chr5	26107354	26107744	1254	0	-	0	No	0	No	0	No	1	1
chr5	26560811	26561021	1255	0	+	0	No	0	No	0	No	1	0
chr5	26563646	26564097	1256	0	+	0	No	0	No	0	No	1	0
chr5	26730715	26731082	1258	0	-	0	No	0	No	0	No	1	0
chr5	26768813	26769217	1261	0	+	0	No	0	No	0	No	3	0
chr5	26775133	26775522	1262	0	+	0	No	0	No	0	No	1	0
chr5	27514121	27514541	1264	2	-	1.92562	No	0	No	0	No	2	0
chr5	27520266	27520676	1266	0	-	0	No	0	No	0	No	1	0
chr5	27636461	27636850	1268	1	-	0.000539062	No	0	No	0	No	2	0
chr5	27897473	27897990	1269	0	+	0	No	0	No	0	No	1	0
chr5	27903597	27904021	1270	0	+	0	No	0	No	0	No	2	0
chr5	28122597	28122983	1272	0	-	0	No	0	No	0	No	1	0
chr5	28412496	28412942	1273	0	+	0	No	0	No	0	No	1	0
chr5	28974750	28975134	1276	1	-	0.113377	No	0	No	0	No	1	0
chr5	29474155	29474536	1278	2	-	0.666349	No	0	No	0	No	2	0
chr5	29602571	29602985	1281	0	-	0	No	0	No	0	No	1	0
chr5	30814809	30815255	1282	0	-	0	No	0	No	0	No	1	0
chr5	30918391	30918949	1283	1	-	0.626533	No	0	No	0	No	1	0
chr5	32287157	32287591	1284	7	+	0.590571	Yes	0	No	0	No	1	0
chr5	32293169	32293609	1285	0	+	0	No	0	No	0	No	1	0
chr5	32317748	32318181	1287	0	-	0	No	0	No	0	No	0	0
chr5	33376909	33377352	1288	1	-	0.076492	No	0	No	0	No	2	0
chr5	34378548	34378944	1289	2	+	0.688123	No	0	No	0	No	2	0
chr5	35251214	35251594	1293	0	+	0	No	0	No	0	No	1	0
chr5	36298899	36299335	1295	0	+	0	No	0	No	0	No	2	0
chr5	36752249	36752622	1297	0	+	0	No	0	No	0	No	2	0
chr5	37264508	37264949	1299	0	-	0	No	0	No	0	No	0	0
chr5	37271616	37271987	1301	0	-	0	No	0	No	0	No	0	0
chr5	37513522	37513955	1302	0	-	0	No	0	No	0	No	1	0
chr5	37793304	37793724	1303	0	+	0	No	0	No	0	No	1	0
chr5	39859023	39859426	1304	2	-	0.114774	No	0	No	0	No	1	0
chr5	39971895	39972275	1306	0	-	0	No	0	No	0	No	1	0
chr5	39976414	39976803	1307	0	-	0	No	0	No	0	No	1	0
chr5	40651854	40652238	1309	0	-	0	No	0	No	0	No	1	0
chr5	41665129	41665513	1313	0	-	0	No	0	No	0	No	2	0
chr5	41993580	41994050	1314	0	-	0	No	0	No	0	No	1	0
chr5	41999575	41999956	1317	0	-	0	No	0	No	0	No	1	0
chr5	44240182	44240631	1318	2	-	0.0126316	No	0	No	0	No	2	0
chr5	44552502	44552896	1319	0	+	0	No	0	No	0	No	1	0
chr5	45115004	45115476	1321	0	+	0	No	0	No	0	No	1	0
chr5	51085712	51086129	1323	2	-	0.00222664	No	0	No	0	No	0	0
chr5	52283903	52284315	1324	57	-	38.7644	Yes	0	No	0	No	2	1
chr5	52517580	52517794	1325	0	-	0	No	0	No	0	No	0	0
chr5	52745284	52745728	1326	0	-	0	No	0	No	0	No	2	0
chr5	53589601	53590025	1327	2	+	0.00821339	No	0.252937	No	0	No	1	0
chr5	56416202	56416650	1328	0	-	0	No	0	No	0	No	2	0
chr5	59392108	59392556	1329	0	+	0	No	0	No	0	No	0	0
chr5	60120799	60121254	1330	0	+	0	No	0	No	0	No	1	0
chr5	61092802	61093349	1331	1	-	1.85648	No	0	No	0	No	1	0
chr5	61908182	61908555	1333	1	-	0.000745809	No	0	No	0	No	0	0
chr5	62108274	62108693	1334	0	+	0	No	0	No	0	No	1	0
chr5	63154591	63154983	1335	0	+	0	No	0	No	0	No	1	0
chr5	65235391	65235827	1337	0	+	0	No	0	No	0	No	2	0
chr5	65868253	65868622	1339	12	-	5.56352	Yes	0	No	0	No	1	0
chr5	66767571	66768028	1340	0	-	0	No	0	No	0	No	0	0
chr5	67555737	67556169	1342	1	-	0.00050688	No	0	No	0	No	1	0
chr5	68815136	68815586	1343	0	+	0	No	0	No	0	No	1	0
chr5	71896432	71896813	1344	12	+	4.34063	Yes	0	No	0	No	1	1
chr5	72536349	72536795	1348	3	+	0.898247	No	0	No	0	No	2	0
chr5	74330646	74331070	1349	0	-	0	No	0	No	0	No	1	0
chr5	75792085	75792373	1351	1	-	0.00333768	No	0	No	0	No	1	0
chr5	75802736	75803172	1352	12	+	3.87631	Yes	0	No	0	No	2	0
chr5	77159201	77159667	1353	24	+	4.7851	Yes	0	No	0	No	1	0
chr5	80122158	80122554	1354	0	-	0	No	0	No	0	No	1	1
chr5	85244687	85245146	1356	0	-	0	No	0	No	0	No	1	0
chr5	85250836	85251252	1357	0	-	0	No	0	No	0	No	1	0
chr5	86147592	86147990	1359	3	-	1.50747	No	0	No	0	No	1	0
chr5	86454740	86455140	1361	0	+	0	No	0	No	0	No	1	1
chr5	86467781	86468278	1364	1	+	0.09324	No	0	No	0	No	2	0
chr5	87047283	87047545	1365	0	-	0	No	0	No	0	No	2	0
chr5	89173158	89173580	1367	10	+	6.95731	Yes	0	No	0	No	2	0
chr5	92215208	92215633	1368	0	+	0	No	0	No	0	No	0	0
chr5	92221263	92221650	1369	0	+	0	No	0	No	0	No	0	0
chr5	95135415	95135834	1370	0	+	0	No	0	No	0	No	0	0
chr5	95486919	95487349	1371	0	+	0	No	0	No	0	No	1	1
chr5	97211057	97211457	1372	0	-	0	No	0	No	0	No	1	0
chr5	98029189	98029629	1373	0	-	0	No	0	No	0	No	1	0
chr5	98035274	98035725	1374	2	-	0.00235803	No	0	No	0	No	1	0
chr5	98953351	98953785	1375	5	-	0.460399	Yes	0	No	0	No	1	0
chr5	99797985	99798351	1376	0	+	0	No	0	No	0	No	0	0
chr5	100498173	100498579	1379	3	-	0.654369	No	0	No	0	No	2	0
chr5	100580322	100580749	1380	0	-	0	No	0	No	0	No	1	0
chr5	101954732	101955119	1383	0	-	0	No	0	No	0	No	1	0
chr5	102779505	102779880	1384	2	+	0.0134792	No	0	No	0	No	1	0
chr5	104436646	104437017	1386	0	+	0	No	0	No	0	No	1	0
chr5	104864532	104864968	1388	0	+	0	No	0	No	0	No	0	0
chr5	104867064	104867492	1389	0	+	0	No	0	No	0	No	1	0
chr5	104871560	104872029	1392	0	+	0	No	0	No	0	No	0	0
chr5	105112296	105112703	1393	2	-	1.00714	No	0	No	0	No	1	0
chr5	105115162	105115549	1394	0	-	0	No	0	No	0	No	1	0
chr5	106268148	106268554	1396	1	-	0.311335	No	0	No	0	No	2	0
chr5	106802501	106802955	1397	0	-	0	No	0	No	0	No	1	1
chr5	106912743	106913136	1398	0	-	0	No	0	No	0	No	1	0
chr5	106918989	106919416	1399	0	-	0	No	0	No	0	No	1	0
chr5	108232404	108232782	1400	0	+	0	No	0.150059	No	0	No	1	0
chr5	108519487	108520000	1403	0	-	0	No	0	No	0	No	0	0
chr5	108589864	108590308	1404	0	+	0	No	0	No	0	No	1	0
chr5	110315247	110315629	1406	0	-	0	No	0	No	0	No	1	0
chr5	110317199	110317640	1407	0	-	0	No	0	No	0	No	2	0
chr5	110554061	110554511	1408	2	+	0.352999	No	0	No	0	No	2	0
chr5	113646469	113646909	1409	10	-	2.86078	Yes	0	No	0	No	2	0
chr5	113912032	113912419	1410	0	+	0	No	0.089214	No	0	No	1	0
chr5	115102506	115102950	1412	0	-	0	No	0	No	0	No	0	0
chr5	115724654	115725098	1413	0	-	0	No	0	No	0	No	0	0
chr5	115731147	115731535	1415	1	-	0.000745809	No	0	No	0	No	1	0
chr5	117085585	117085957	1416	0	-	0	No	0	No	0	No	0	0
chr5	118537993	118538387	1417	19	-	7.71986	Yes	0	No	0	No	2	0
chr5	120995352	120995560	1419	1	-	0.000792662	No	0	No	0	No	0	0
chr5	121315726	121316110	1421	1	-	0.163068	No	0	No	0	No	1	1
chr5	124135866	124136298	1423	1	+	0.00040029	No	0	No	0	No	1	0
chr5	125334017	125334504	1424	0	-	0	No	0	No	0	No	1	0
chr5	125680094	125680565	1426	0	-	0	No	0	No	0	No	1	0
chr5	127673989	127674370	1427	1	+	0.00865196	No	0	No	0	No	3	2
chr5	127680148	127680496	1429	0	+	0	No	0	No	0	No	1	0
chr5	128785231	128785601	1430	4	-	3.96982	No	0	No	0	No	1	0
chr5	130595905	130596315	1431	1	+	0.450813	No	0	No	0	No	2	1
chr5	133042930	133043329	1433	0	-	0	No	0	No	0	No	1	0
chr5	133329349	133329814	1434	0	-	0	No	0	No	0	No	1	0
chr5	143568439	143568830	1435	0	-	0	No	0	No	0	No	0	0
chr5	145267024	145267416	1437	0	-	0	No	0	No	0	No	1	0
chr5	151272807	151273243	1438	0	-	0	No	0	No	0	No	1	0
chr5	156228844	156229251	1439	0	+	0	No	0	No	0	No	0	0
chr5	156406820	156407240	1441	0	-	0	No	0	No	0	No	0	0
chr5	160990222	160990659	1442	0	+	0	No	0	No	0	No	2	0
chr5	160998884	160999275	1443	0	+	0	No	0	No	0	No	2	0
chr5	161019216	161019635	1445	0	+	0	No	0	No	0	No	0	0
chr5	161929964	161930351	1447	3	+	0.801352	No	0	No	0	No	2	1
chr5	162030368	162030822	1449	0	+	0	No	0	No	0.102318	No	0	0
chr5	164827237	164827687	1450	0	+	0	No	0.126469	No	0	No	2	0
chr5	164830631	164831132	1451	1	+	1.02404	No	0	No	0	No	1	0
chr5	165621662	165622096	1452	0	-	0	No	0	No	0	No	0	0
chr5	168512480	168512911	1453	1	-	0.000306425	No	0	No	0	No	0	0
chr5	172555388	172555822	1454	0	+	0	No	0	No	0	No	0	0
chr5	174278022	174278484	1455	0	+	0	No	0	No	0	No	1	0
chr6	2307120	2307503	1456	8	+	0.679128	Yes	0.300118	No	0	No	1	0
chr6	4860645	4861040	1459	0	-	0	No	0.126469	No	0	No	1	1
chr6	5576152	5576546	1460	0	+	0	No	0	No	0	No	0	0
chr6	6294135	6294512	1462	0	+	0	No	0	No	0	No	1	1
chr6	8089299	8089738	1464	4	-	0.317701	No	0.632343	No	0	No	0	1
chr6	8224011	8224583	1465	0	+	0	No	0.126469	No	0	No	0	0
chr6	8403435	8403838	1467	0	-	0	No	0	No	0	No	1	0
chr6	8409396	8409888	1468	4	-	0.519355	No	0	No	0	No	1	0
chr6	9145489	9145897	1469	2	+	1.92669	No	0	No	0	No	1	0
chr6	9152434	9152851	1471	3	+	0.536322	No	0	No	0	No	1	0
chr6	9179815	9180217	1474	0	-	0	No	0	No	0	No	2	1
chr6	9549335	9549669	1475	0	+	0	No	0	No	0	No	0	0
chr6	12683836	12684220	1478	0	+	0	No	0	No	0	No	0	0
chr6	14683294	14683688	1481	0	-	0	No	0	No	0	No	1	0
chr6	18887432	18887836	1482	4	+	0.00518883	No	0	No	0	No	0	0
chr6	19406670	19406907	1484	0	-	0	No	0	No	0	No	1	0
chr6	19507688	19508103	1486	0	-	0	No	0	No	0	No	0	0
chr6	22641102	22641535	1487	0	+	0	No	0	No	0	No	1	0
chr6	23012010	23012450	1488	9	+	6.37912	Yes	0	No	0	No	2	1
chr6	23160067	23160438	1490	0	+	0	No	0	No	0	No	0	0
chr6	27491902	27492166	1491	0	+	0	No	0	No	0	No	1	0
chr6	30971424	30971833	1492	0	+	0	No	0	No	0	No	2	0
chr6	31426917	31427297	1493	0	+	0	No	0	No	0	No	0	0
chr6	31435550	31436004	1495	0	+	0	No	0	No	0	No	1	0
chr6	36344457	36344674	1496	1	+	0.0012257	No	0	No	0	No	0	0
chr6	41112972	41113360	1498	14	-	6.1496	Yes	0	No	0	No	2	1
chr6	49373890	49374318	1499	0	+	0	No	0	No	0	No	0	1
chr6	49438616	49439018	1500	14	+	6.0671	Yes	0	No	0	No	0	0
chr6	51051784	51052228	1501	0	+	0	No	0	No	0	No	0	0
chr6	51058302	51058693	1502	1	+	0.000665831	No	0	No	0	No	1	0
chr6	52973760	52974200	1504	14	+	4.43106	Yes	0	No	0	No	0	1
chr6	54430538	54430925	1505	0	-	0	No	0	No	0	No	0	0
chr6	55627500	55627881	1506	0	+	0	No	0	No	0	No	1	1
chr6	57662843	57663197	1508	0	+	0	No	0	No	0	No	1	0
chr6	57666184	57666573	1509	0	+	0	No	0	No	0	No	1	0
chr6	60561625	60562004	1511	0	+	0	No	0	No	0	No	1	0
chr6	60564976	60565366	1512	0	+	0	No	0	No	0	No	2	0
chr6	62032133	62032604	1513	0	+	0	No	0	No	0	No	2	0
chr6	62649789	62650242	1514	2	+	1.02607	No	0	No	0	No	2	0
chr6	63132339	63132741	1516	0	-	0	No	0	No	0	No	0	0
chr6	63138344	63138823	1517	1	-	0.0818533	No	0	No	0	No	1	0
chr6	63880080	63880487	1518	0	+	0	No	0	No	0	No	1	1
chr6	64107315	64107694	1521	0	-	0	No	0.150059	No	0	No	2	0
chr6	67589802	67590223	1522	0	+	0	No	0	No	0	No	1	0
chr6	68002192	68002598	1525	0	-	0	No	0	No	0	No	1	0
chr6	68353207	68353643	1526	7	-	5.89163	Yes	0	No	0	No	2	0
chr6	69206078	69206462	1530	2	-	1.11456	No	0	No	0	No	1	0
chr6	69210170	69210558	1532	2	-	0.0012524	No	0	No	0	No	1	0
chr6	69658788	69659221	1533	0	-	0	No	0	No	0	No	1	0
chr6	73095978	73096206	1535	0	-	0	No	0	No	0	No	0	0
chr6	74146269	74146708	1536	1	-	0.246203	No	0	No	0	No	2	0
chr6	74536729	74537105	1537	0	+	0	No	0.126469	No	0	No	2	0
chr6	74542840	74543279	1538	0	+	0	No	0	No	0	No	1	0
chr6	74560175	74560563	1542	0	-	0	No	0	No	0	No	1	0
chr6	76529651	76530046	1543	3	+	0.184077	No	0	No	0	No	0	0
chr6	77103034	77103447	1544	2	+	0.183368	No	0	No	0.079143	No	1	0
chr6	78100060	78100473	1545	1	-	0.00075392	No	0	No	0	No	2	0
chr6	79815742	79816184	1546	2	+	0.94756	No	0	No	0	No	2	0
chr6	79988559	79989030	1547	0	+	0	No	0	No	0	No	2	0
chr6	80384054	80384348	1548	10	+	1.36272	Yes	0	No	0	No	0	0
chr6	80390763	80391236	1550	14	+	6.50656	Yes	0	No	0	No	1	1
chr6	81004961	81005340	1551	6	+	4.71057	Yes	0	No	0	No	1	0
chr6	82875296	82875723	1552	0	-	0	No	0	No	0	No	1	0
chr6	83357516	83357935	1553	2	+	0.0163658	No	0	No	0	No	1	0
chr6	83364004	83364446	1555	0	+	0	No	0	No	0	No	0	0
chr6	84300040	84300475	1556	2	-	0.207808	No	0	No	0	No	0	0
chr6	84823320	84823759	1557	1	+	0.0292948	No	0	No	0	No	0	0
chr6	84903226	84903715	1558	0	-	0	No	0	No	0	No	1	1
chr6	85128308	85128722	1559	0	+	0	No	0	No	0	No	0	1
chr6	85808587	85808954	1561	0	+	0	No	0	No	0	No	1	0
chr6	85835537	85835978	1564	0	+	0	No	0	No	0	No	0	0
chr6	87896240	87896655	1565	1	-	0.000924991	No	0	No	0	No	1	0
chr6	88960928	88961416	1566	17	+	7.62327	Yes	0	No	0	No	0	0
chr6	92787471	92787875	1567	0	-	0	No	0	No	0	No	1	0
chr6	93002484	93002927	1568	0	+	0	No	0	No	0	No	1	0
chr6	93846636	93847077	1570	5	-	0.65182	Yes	0	No	0	No	2	0
chr6	94190823	94191222	1571	0	+	0	No	0	No	0	No	1	0
chr6	98166614	98167057	1573	0	+	0	No	0	No	0	No	1	0
chr6	98172945	98173383	1574	0	+	0	No	0	No	0	No	1	0
chr6	98445527	98445929	1575	0	+	0	No	0	No	0	No	2	0
chr6	99020511	99020967	1577	0	-	0	No	0	No	0	No	1	0
chr6	102877033	102877478	1578	0	+	0	No	0	No	0	No	0	0
chr6	103100818	103101211	1579	0	+	0	No	0	No	0	No	0	0
chr6	104079206	104079672	1581	0	+	0	No	0	No	0	No	1	0
chr6	104085119	104085400	1582	0	+	0	No	0.126469	No	0	No	2	0
chr6	105003879	105004335	1584	0	-	0	No	0	No	0	No	1	0
chr6	105291342	105291749	1585	5	+	4.54559	Yes	0	No	0	No	2	1
chr6	105668495	105668927	1586	0	-	0	No	0	No	0	No	1	0
chr6	108842185	108842590	1587	0	+	0	No	0	No	0	No	2	0
chr6	109852093	109852558	1589	1	+	0.00424089	No	0	No	0	No	2	0
chr6	110286662	110287058	1590	0	+	0	No	0	No	0	No	0	1
chr6	113594014	113594290	1591	0	-	0	No	0	No	0	No	0	0
chr6	113594582	113594797	1592	0	-	0	No	0	No	0	No	2	0
chr6	114583019	114583442	1594	4	-	2.35789	No	0	No	0	No	2	0
chr6	115102429	115102836	1595	0	-	0	No	0	No	0	No	1	1
chr6	116066038	116066504	1596	0	+	0	No	0	No	0	No	1	0
chr6	117132781	117133021	1599	4	-	0.0052241	No	0	No	0	No	2	0
chr6	118793873	118794269	1600	5	+	1.48692	Yes	0.089214	No	0	No	2	0
chr6	119262812	119263174	1602	0	+	0	No	0	No	0	No	1	0
chr6	121191684	121192123	1604	0	+	0	No	0	No	0	No	1	0
chr6	121197766	121198187	1605	0	+	0	No	0	No	0	No	0	0
chr6	121216003	121216443	1607	0	+	0	No	0	No	0	No	0	0
chr6	121218406	121218652	1608	0	+	0	No	0	No	0	No	1	0
chr6	121635881	121636191	1610	1	+	0.000481707	No	0	No	0.102318	No	1	1
chr6	121638084	121638441	1612	0	-	0	No	0	No	0	No	1	0
chr6	122455207	122455654	1613	5	+	1.27195	Yes	0	No	0	No	1	0
chr6	122600042	122600432	1616	0	-	0	No	0	No	0	No	1	0
chr6	122838987	122839377	1617	9	+	1.71406	Yes	0.089214	No	0	No	2	0
chr6	123793482	123793800	1619	0	+	0	No	0	No	0	No	1	0
chr6	123799160	123799546	1620	1	+	0.151354	No	0	No	0	No	2	0
chr6	124686751	124687180	1622	0	+	0	No	0	No	0	No	0	0
chr6	125144436	125144790	1625	1	+	0.00117961	No	0	No	0	No	0	0
chr6	126464339	126464878	1627	1	+	0.585707	No	0.126469	No	0	No	1	0
chr6	127059578	127059993	1628	0	+	0	No	0	No	0	No	0	1
chr6	127277451	127277872	1630	1	-	0.000792662	No	0	No	0	No	1	0
chr6	127800527	127800921	1631	0	+	0	No	0	No	0	No	1	0
chr6	127966978	127967404	1632	16	+	2.53024	Yes	0	No	0	No	2	1
chr6	128961368	128961808	1634	0	-	0	No	0	No	0	No	2	0
chr6	129589708	129590219	1635	0	-	0	No	0.126469	No	0	No	1	0
chr6	130630794	130631242	1638	0	+	0	No	0	No	0	No	1	0
chr6	131302067	131302452	1639	0	+	0	No	0	No	0	No	0	0
chr6	132516666	132517035	1641	0	+	0	No	0	No	0	No	1	0
chr6	132806658	132807052	1643	1	+	0.620049	No	0	No	0	No	1	0
chr6	133269756	133270213	1645	0	-	0	No	0	No	0.079143	No	1	0
chr6	133273117	133273501	1647	2	-	0.092544	No	0	No	0	No	2	0
chr6	133556991	133557222	1648	0	-	0	No	0	No	0	No	0	0
chr6	133561714	133562147	1650	0	-	0	No	0	No	0	No	1	0
chr6	133649447	133649937	1651	0	+	0	No	0	No	0	No	0	0
chr6	133866798	133867292	1652	1	+	0.942791	No	0	No	0	No	2	0
chr6	134066902	134067342	1653	1	+	1.16977	No	0	No	0	No	2	0
chr6	134611906	134612335	1654	0	+	0	No	0	No	0	No	1	0
chr6	135755766	135756263	1655	1	+	0.000559573	No	0	No	0	No	0	0
chr6	136586629	136587073	1656	0	+	0	No	0	No	0	No	1	0
chr6	137198876	137199289	1657	0	+	0	No	0	No	0	No	1	0
chr6	139411200	139411674	1659	4	-	1.05848	No	0	No	0	No	1	0
chr6	140645837	140646129	1660	0	+	0	No	0	No	0	No	1	0
chr6	140689913	140690373	1662	0	-	0	No	0	No	0	No	1	0
chr6	140696146	140696387	1664	0	-	0	No	0	No	0	No	1	0
chr6	142233151	142233581	1665	0	-	0	No	0	No	0	No	1	0
chr6	142635536	142635952	1666	0	+	0	No	0	No	0	No	1	0
chr6	143868225	143868670	1668	0	-	0	No	0	No	0	No	0	0
chr6	143876575	143877035	1669	0	-	0	No	0	No	0	No	0	0
chr6	144016055	144016519	1670	0	-	0	No	0	No	0	No	1	0
chr6	145305532	145305891	1673	0	-	0	No	0	No	0	No	0	0
chr6	145569808	145570254	1674	2	-	0.840366	No	0	No	0	No	1	0
chr6	145786075	145786451	1676	7	-	1.98046	Yes	0	No	0	No	2	1
chr6	145816976	145817416	1677	0	-	0	No	0	No	0	No	1	0
chr6	146267404	146267620	1678	0	-	0	No	0	No	0	No	0	0
chr6	146267704	146267948	1679	0	-	0	No	0	No	0	No	2	1
chr6	149129165	149129544	1681	0	-	0	No	0.150059	No	0	No	2	0
chr6	149175977	149176408	1682	1	-	0.24232	No	0	No	0	No	1	0
chr6	150414064	150414477	1683	0	+	0	No	0	No	0	No	1	0
chr6	152021025	152021456	1686	3	+	0.768919	No	0	No	0	No	1	1
chr6	153910444	153910824	1687	3	-	0.119344	No	0	No	0	No	1	0
chr6	154333166	154333565	1689	1	+	0.000364403	No	0	No	0	No	1	0
chr6	154656090	154656531	1690	0	+	0	No	0	No	0	No	0	0
chr6	154782536	154783008	1691	0	-	0	No	0	No	0.079143	No	0	0
chr6	155265782	155266187	1693	64	-	39.3367	Yes	0	No	0	No	1	0
chr6	155603705	155604216	1694	0	-	0	No	0	No	0	No	2	0
chr6	157818027	157818512	1695	0	-	0	No	0	No	0	No	0	0
chr6	158989796	158990238	1696	13	+	4.54443	Yes	0	No	0	No	2	0
chr6	159215571	159215968	1697	0	-	0	No	0	No	0	No	1	0
chr6	161426249	161426644	1700	0	+	0	No	0	No	0	No	0	0
chr6	162747015	162747325	1702	0	+	0	No	0	No	0	No	0	0
chr6	164932412	164932814	1709	0	-	0	No	0	No	0	No	0	0
chr6	165523821	165524253	1710	0	+	0	No	0	No	0	No	0	1
chr6	165529878	165530269	1711	0	+	0	No	0	No	0	No	1	1
chr6	166868613	166869023	1713	0	+	0	No	0	No	0	No	1	0
chr6	168005506	168005946	1715	1	-	0.100876	No	0	No	0	No	0	1
chr6	169069818	169070257	1716	0	+	0	No	0	No	0	No	1	0
chr6	169884446	169884920	1717	2	-	0.00400493	No	0	No	0	No	2	0
chr7	51532	52066	1719	0	-	0	No	0.126469	No	0	No	1	0
chr7	3160167	3160598	1720	1	+	0.2072	No	0	No	0	No	1	0
chr7	4194469	4194878	1723	0	-	0	No	0	No	0	No	1	1
chr7	4570621	4571028	1724	0	+	0	No	0	No	0	No	1	0
chr7	10494151	10494526	1726	1	+	0.00040029	No	0	No	0	No	1	0
chr7	11593896	11594340	1728	0	+	0	No	0	No	0	No	2	0
chr7	11599732	11600164	1729	1	+	0.302708	No	0	No	0	No	0	0
chr7	13793474	13793900	1730	0	-	0	No	0	No	0	No	2	0
chr7	13857265	13857708	1731	52	-	40.7598	Yes	0	No	0	No	2	0
chr7	14800261	14800644	1732	8	+	7.17367	Yes	0.089214	No	0	No	2	1
chr7	26125284	26125681	1733	1	+	0.194401	No	0	No	0	No	1	0
chr7	26227287	26227720	1734	3	+	0.915839	No	0.239273	No	0	No	2	0
chr7	28354161	28354606	1736	0	+	0	No	0	No	0	No	1	0
chr7	28447933	28448365	1737	1	+	0.000800578	No	0	No	0	No	2	0
chr7	28858524	28858908	1738	1	-	0.0436584	No	0	No	0	No	1	0
chr7	32438971	32439321	1739	0	+	0	No	0	No	0	No	2	0
chr7	35441448	35441848	1740	0	-	0	No	0	No	0	No	2	0
chr7	36579470	36579914	1741	0	-	0	No	0	No	0	No	2	0
chr7	37475268	37475708	1742	0	-	0	No	0	No	0	No	1	0
chr7	38633387	38633831	1743	3	+	1.10843	No	0	No	0	No	1	0
chr7	45548296	45548737	1744	1	-	0.0642667	No	0	No	0	No	2	0
chr7	45552506	45552820	1745	4	+	0.702127	No	0	No	0	No	1	0
chr7	46116687	46117134	1746	15	+	6.02034	Yes	0	No	0	No	2	0
chr7	51443779	51444260	1747	0	-	0	No	0	No	0.120817	No	2	0
chr7	51717354	51717737	1748	12	+	3.557	Yes	0	No	0	No	2	0
chr7	52185583	52186017	1750	0	+	0	No	0	No	0	No	0	0
chr7	52391096	52391645	1751	0	+	0	No	0	No	0	No	0	0
chr7	54952355	54952858	1752	1	-	0.10811	No	0	No	0	No	1	0
chr7	64401723	64402111	1753	0	+	0	No	0	No	0	No	0	0
chr7	67215625	67216044	1754	0	-	0	No	0	No	0	No	1	1
chr7	68698768	68699221	1755	26	+	17.7269	Yes	0	No	0	No	2	0
chr7	69295420	69295749	1757	0	-	0	No	0	No	0	No	1	0
chr7	71030189	71030613	1758	8	+	0.620165	Yes	0	No	0	No	2	0
chr7	71147171	71147591	1759	11	-	1.78648	Yes	0	No	0	No	1	1
chr7	72598006	72598425	1760	3	+	0.432322	No	0	No	0	No	1	1
chr7	73562677	73563067	1761	0	+	0	No	0	No	0	No	0	0
chr7	77271081	77271492	1763	1	+	0.000800578	No	0	No	0.120817	No	2	0
chr7	77870268	77870709	1764	0	-	0	No	0	No	0	No	1	0
chr7	77874358	77874796	1765	0	-	0	No	0	No	0	No	1	0
chr7	78608843	78609262	1766	1	-	0.598733	No	0	No	0	No	1	0
chr7	78912338	78912715	1767	4	+	0.00988876	No	0	No	0	No	3	0
chr7	80352570	80352857	1769	0	-	0	No	0	No	0	No	1	0
chr7	80470855	80471096	1770	0	+	0	No	0	No	0	No	0	0
chr7	80471149	80471394	1771	0	-	0	No	0	No	0	No	1	0
chr7	80929320	80929704	1773	0	-	0	No	0	No	0	No	0	0
chr7	84599541	84599980	1774	0	-	0	No	0	No	0	No	2	0
chr7	87278266	87278706	1775	0	+	0	No	0	No	0	No	1	0
chr7	87284372	87284743	1776	0	+	0	No	0	No	0	No	2	0
chr7	88385494	88385816	1778	0	+	0	No	0	No	0	No	2	1
chr7	88685041	88685420	1782	1	-	0.084376	No	0	No	0	No	1	0
chr7	93029393	93029780	1784	0	+	0	No	0.150059	No	0	No	1	0
chr7	93387267	93387638	1785	1	+	0.0448324	No	0	No	0	No	1	0
chr7	95299427	95299863	1786	0	+	0	No	0	No	0	No	2	0
chr7	96457421	96457849	1787	0	+	0	No	0	No	0	No	1	0
chr7	104833840	104834275	1798	0	-	0	No	0	No	0	No	2	0
chr7	106638397	106638836	1799	0	-	0	No	0	No	0	No	0	0
chr7	107732302	107732681	1800	0	+	0	No	0	No	0	No	0	1
chr7	107738991	107739462	1801	3	+	0.00168067	No	0	No	0.079143	No	0	0
chr7	108539882	108540233	1804	1	+	0.775689	No	0.126469	No	0	No	1	0
chr7	108669273	108669677	1806	2	+	9.61864	No	0	No	0	No	2	1
chr7	108676396	108676787	1807	25	+	13.3905	Yes	0	No	0	No	1	0
chr7	108965439	108965863	1808	3	-	1.45787	No	0	No	0	No	2	0
chr7	109253578	109254025	1809	0	-	0	No	0	No	0	No	2	1
chr7	109514374	109514808	1810	0	-	0	No	0	No	0	No	2	0
chr7	109699914	109700457	1811	1	+	1.02629	No	0	No	0	No	1	0
chr7	109790251	109790663	1813	0	-	0	No	0	No	0	No	1	0
chr7	110634092	110634473	1815	0	-	0	No	0.089214	No	0	No	1	0
chr7	111564597	111565036	1816	4	-	1.63083	No	0	No	0	No	0	0
chr7	112222723	112223161	1817	2	+	0.345989	No	0	No	0	No	1	0
chr7	112368383	112368601	1818	0	+	0	No	0	No	0	No	1	0
chr7	114903489	114903881	1821	0	-	0	No	0	No	0	No	1	0
chr7	115523088	115523336	1824	0	-	0	No	0	No	0	No	2	0
chr7	117055795	117056238	1825	0	-	0	No	0	No	0	No	1	0
chr7	119217029	119217438	1826	0	+	0	No	0	No	0	No	1	0
chr7	119814462	119814930	1828	1	+	0.00215626	No	0	No	0	No	1	0
chr7	121526422	121526797	1830	0	-	0	No	0	No	0	No	0	0
chr7	122911793	122912197	1833	0	+	0	No	0	No	0	No	2	0
chr7	123212085	123212489	1834	0	+	0	No	0	No	0	No	1	0
chr7	126364146	126364565	1836	28	+	27.0381	Yes	0	No	0	No	2	0
chr7	129444200	129444645	1837	5	-	1.77516	Yes	9.2781	Yes	0	No	1	0
chr7	130235116	130235491	1838	3	+	0.0205642	No	0	No	0	No	1	0
chr7	132634787	132635170	1840	0	+	0	No	0	No	0	No	0	0
chr7	133643146	133643522	1842	0	-	0	No	0	No	0	No	0	0
chr7	134973802	134974250	1843	8	-	0.193303	Yes	0	No	0	No	2	0
chr7	136573396	136573812	1845	1	-	0.00238648	No	0	No	0	No	2	0
chr7	136579107	136579506	1847	0	-	0	No	0	No	0	No	2	0
chr7	137023797	137024231	1849	4	-	0.568178	No	0	No	0	No	1	0
chr7	140073017	140073369	1851	0	-	0	No	0	No	0	No	0	1
chr7	140081394	140081650	1852	0	+	0	No	0	No	0	No	0	0
chr7	143121736	143121945	1854	0	+	0	No	0	No	0	No	0	0
chr7	143122252	143122478	1855	0	+	0	No	0	No	0	No	0	0
chr7	143178790	143179215	1856	0	-	0	No	0	No	0	No	0	0
chr7	144715670	144716060	1858	5	-	0.800055	Yes	0	No	0	No	1	0
chr7	148081264	148081692	1859	7	+	0.767961	Yes	0	No	0	No	1	0
chr7	148291247	148291708	1860	0	-	0	No	0	No	0	No	0	0
chr7	148581085	148581532	1861	4	-	0.599517	No	0	No	0	No	2	0
chr7	148610179	148610630	1862	0	+	0	No	0	No	0	No	1	0
chr7	148779731	148780168	1863	1	+	0.00449778	No	0	No	0	No	2	0
chr7	149051313	149051752	1864	0	+	0	No	0	No	0	No	1	0
chr7	149057889	149058264	1866	0	+	0	No	0	No	0	No	0	0
chr7	149236949	149237395	1868	3	+	0.00562269	No	0	No	0	No	1	0
chr7	152959291	152959715	1869	0	-	0	No	0	No	0	No	1	0
chr7	153169051	153169415	1870	7	+	3.97265	Yes	0	No	0	No	0	0
chr7	153328211	153328634	1872	8	+	6.45753	Yes	0	No	0	No	2	1
chr7	153484221	153484664	1875	1	-	0.00116346	No	0	No	0	No	1	0
chr7	153505094	153505508	1876	0	+	0	No	0	No	0	No	2	0
chr7	154688483	154688902	1877	5	-	5.9726	Yes	0	No	0	No	2	0
chr7	155180038	155180318	1879	0	-	0	No	0	No	0	No	2	0
chr7	155286321	155286768	1880	0	+	0	No	0	No	0	No	0	0
chr7	156863063	156863541	1881	0	-	0	No	0	No	0	No	1	0
chr7	158368870	158369260	1882	0	+	0	No	0	No	0	No	1	0
chr8	2542532	2542963	1884	0	+	0	No	0	No	0	No	1	0
chr8	3208572	3209011	1885	0	+	0	No	0	No	0	No	1	0
chr8	3670054	3670475	1886	0	+	0	No	0	No	0	No	1	0
chr8	8431303	8431688	1888	0	+	0	No	0	No	0	No	2	0
chr8	10711919	10712308	1890	5	-	0.00850721	Yes	0	No	0	No	0	0
chr8	13582304	13582743	1891	3	+	1.34942	No	0	No	0	No	2	1
chr8	15868891	15869325	1892	0	+	0	No	0	No	0	No	1	1
chr8	16827648	16828071	1894	10	-	4.82454	Yes	1.59525	No	0	No	2	0
chr8	20097560	20097991	1895	0	-	0	No	0	No	0	No	1	0
chr8	20570677	20571078	1896	0	+	0	No	0.089214	No	0	No	2	0
chr8	23239043	23239481	1898	4	+	2.14328	No	0	No	0	No	1	0
chr8	23954751	23955183	1900	0	-	0	No	0	No	0	No	2	0
chr8	25426194	25426648	1901	6	-	1.39071	Yes	0.089214	No	0.102318	No	1	0
chr8	28279084	28279599	1902	6	+	3.19619	Yes	0	No	0	No	2	0
chr8	32806586	32806975	1904	0	-	0	No	0	No	0	No	0	0
chr8	34272275	34272638	1905	0	-	0	No	0	No	0	No	1	0
chr8	36463737	36464212	1906	0	-	0	No	0	No	0	No	0	0
chr8	41557803	41558189	1909	4	+	0.730503	No	0	No	0	No	1	0
chr8	46989655	46990061	1912	0	-	0	No	0	No	0	No	1	0
chr8	50381815	50382243	1914	0	-	0	No	0	No	0	No	0	1
chr8	52530770	52531170	1916	11	+	1.91044	Yes	0	No	0	No	2	1
chr8	52568176	52568377	1919	0	-	0	No	0	No	0	No	0	0
chr8	52571231	52571470	1922	0	-	0	No	0	No	0	No	0	0
chr8	59236499	59236887	1924	44	-	16.7195	Yes	0	No	0	No	2	0
chr8	62338551	62338999	1925	5	-	2.99414	Yes	0	No	0	No	1	0
chr8	63728663	63729086	1926	2	+	0.44171	No	0	No	0	No	1	0
chr8	63920509	63920891	1929	0	+	0	No	0	No	0	No	1	0
chr8	64121220	64121660	1930	0	-	0	No	0	No	0	No	1	0
chr8	64127435	64127799	1932	0	-	0	No	0	No	0	No	1	0
chr8	65754008	65754396	1933	0	-	0	No	0	No	0	No	1	0
chr8	67797288	67797679	1934	1	+	0.043244	No	0.239273	No	0	No	1	0
chr8	75263413	75263786	1937	0	+	0	No	0	No	0	No	1	0
chr8	75584713	75585149	1939	7	-	2.55572	Yes	0	No	0	No	2	0
chr8	76040475	76040852	1941	0	-	0	No	0	No	0	No	1	0
chr8	76103723	76104109	1943	1	-	0.00287887	No	0	No	0	No	1	1
chr8	76268389	76268816	1944	0	+	0	No	0	No	0	No	1	0
chr8	77190087	77190519	1946	0	+	0	No	0	No	0	No	1	0
chr8	77888452	77888847	1948	41	-	32.4303	Yes	0.178428	No	0	No	2	1
chr8	78155678	78156085	1949	0	+	0	No	0	No	0	No	0	0
chr8	78162506	78162899	1950	0	+	0	No	0	No	0	No	1	0
chr8	78187450	78187892	1952	7	-	3.67258	Yes	0	No	0	No	1	0
chr8	79504022	79504454	1953	1	+	1.01628	No	0	No	0	No	0	0
chr8	81243028	81243446	1954	1	-	0.000961587	No	0	No	0	No	1	0
chr8	83710990	83711232	1955	0	-	0	No	0	No	0	No	0	0
chr8	83717869	83718200	1958	0	+	0	No	0	No	0	No	0	0
chr8	88509226	88509481	1960	0	-	0	No	0.178428	No	0	No	1	0
chr8	88769442	88769860	1961	0	+	0	No	0	No	0	No	1	0
chr8	88775443	88775883	1962	0	+	0	No	0	No	0	No	0	0
chr8	92761184	92761568	1964	1	-	0.273874	No	0.126469	No	0	No	0	1
chr8	92769984	92770386	1965	1	-	0.0014016	No	0	No	0	No	1	0
chr8	93476093	93476482	1966	0	+	0	No	0	No	0	No	1	0
chr8	94303106	94303550	1968	1	-	0.227688	No	0	No	0	No	1	0
chr8	95090633	95091110	1969	25	+	16.0269	Yes	0	No	0	No	2	0
chr8	95871901	95872334	1971	0	-	0	No	0	No	0	No	1	0
chr8	96737295	96737748	1974	0	-	0	No	0	No	0	No	0	1
chr8	97456089	97456611	1975	1	-	0.00189646	No	0	No	0	No	1	0
chr8	98915063	98915432	1976	0	+	0	No	0	No	0	No	2	0
chr8	100114729	100115122	1978	0	+	0	No	0	No	0	No	0	0
chr8	100202982	100203384	1981	2	+	0.43835	No	0	No	0	No	2	0
chr8	100208916	100209403	1982	0	+	0	No	0	No	0	No	1	0
chr8	103160598	103161028	1983	0	-	0	No	0	No	0	No	1	0
chr8	105869122	105869566	1985	0	-	0	No	0	No	0	No	1	0
chr8	105925367	105925802	1986	1	+	0.00152669	No	0	No	0	No	2	0
chr8	106894573	106894966	1988	1	-	0.00253275	No	0	No	0	No	0	0
chr8	107681602	107682006	1989	2	-	0.444602	No	0	No	0	No	1	0
chr8	108427292	108427741	1990	0	+	0	No	0	No	0.079143	No	1	0
chr8	109938670	109939036	1992	0	-	0	No	0	No	0	No	2	0
chr8	109944557	109944934	1993	0	-	0	No	0	No	0	No	2	0
chr8	110582593	110582918	1994	0	-	0	No	0	No	0	No	1	0
chr8	110886547	110886992	1997	1	+	1.61578	No	0	No	0	No	2	0
chr8	111208268	111208694	1999	0	-	0	No	0	No	0	No	2	0
chr8	111848689	111848905	2000	0	-	0	No	0	No	0	No	0	0
chr8	113934401	113934834	2002	0	-	0	No	0	No	0	No	1	0
chr8	113941120	113941548	2003	0	-	0	No	0	No	0	No	1	0
chr8	114571231	114571779	2004	0	+	0	No	0	No	0	No	1	0
chr8	115289163	115289718	2005	0	-	0	No	0	No	0	No	0	0
chr8	116144990	116145435	2006	14	-	6.98477	Yes	0	No	0	No	1	0
chr8	116151012	116151341	2008	2	-	0.864502	No	0	No	0	No	1	0
chr8	117617206	117617587	2010	0	+	0	No	0	No	0	No	1	0
chr8	119170239	119170598	2012	0	-	0	No	0.126469	No	0	No	0	1
chr8	119499195	119499621	2014	0	-	0	No	0	No	0	No	0	0
chr8	120069348	120069801	2015	0	+	0	No	0	No	0	No	1	1
chr8	125812548	125813005	2016	0	+	0	No	0	No	0	No	1	0
chr8	127557781	127558212	2017	0	+	0	No	0	No	0	No	2	0
chr8	127653354	127653787	2018	0	+	0	No	0	No	0	No	2	0
chr8	127830648	127831042	2019	30	+	27.4224	Yes	0	No	0	No	2	0
chr8	128701706	128702090	2022	0	-	0	No	0	No	0	No	2	0
chr8	130748294	130748696	2024	0	-	0	No	0	No	0	No	0	0
chr8	131512016	131512500	2025	0	-	0	No	0	No	0	No	1	1
chr8	136523855	136524241	2027	0	-	0	No	0	No	0	No	2	0
chr8	136633028	136633564	2028	0	+	0	No	0	No	0.102318	No	1	0
chr8	137482742	137483217	2029	0	-	0	No	0	No	0	No	1	0
chr8	137713605	137714056	2030	0	+	0	No	0	No	0	No	2	0
chr8	138517863	138518254	2033	0	-	0	No	0	No	0	No	1	0
chr8	138783257	138783688	2034	0	-	0	No	0	No	0	No	0	0
chr8	139114555	139114970	2035	0	-	0	No	0	No	0	No	1	0
chr8	140378204	140378629	2036	0	+	0	No	0	No	0	No	0	0
chr8	144868592	144868834	2037	0	+	0	No	0	No	0	No	0	0
chr8	144874428	144874710	2038	0	+	0	No	0	No	0	No	1	1
chr9	1105500	1105891	2040	0	-	0	No	0	No	0	No	1	0
chr9	2449932	2450350	2041	0	+	0	No	0	No	0	No	0	1
chr9	2580819	2581280	2043	2	+	0.762428	No	0	No	0	No	1	0
chr9	2792052	2792445	2044	3	+	0.753712	No	0	No	0	No	2	0
chr9	2997277	2997655	2048	2	+	0.000903465	No	0	No	0	No	1	0
chr9	5409153	5409551	2051	1	+	1.31826	No	0	No	0	No	1	1
chr9	5740418	5740868	2052	1	-	0.00050688	No	0	No	0	No	1	1
chr9	6099161	6099361	2053	0	+	0	No	0	No	0	No	2	0
chr9	6105101	6105492	2054	0	+	0	No	0	No	0	No	0	0
chr9	6211771	6212203	2056	0	-	0	No	0	No	0	No	1	1
chr9	10031253	10031647	2057	0	+	0	No	0	No	0	No	0	0
chr9	12331985	12332419	2059	1	+	0.304027	No	0	No	0	No	0	0
chr9	12990228	12990662	2060	0	-	0	No	0	No	0	No	1	0
chr9	17119586	17119977	2062	0	-	0	No	0	No	0	No	0	0
chr9	17826437	17826885	2063	0	-	0	No	0	No	0	No	1	1
chr9	21846887	21847326	2064	7	+	0.255984	Yes	0	No	0	No	1	0
chr9	21851617	21852044	2065	6	+	1.0872	Yes	0	No	0	No	2	0
chr9	22827207	22827611	2066	0	-	0	No	0	No	0	No	1	1
chr9	23314904	23315329	2067	0	+	0	No	0	No	0	No	1	0
chr9	24674997	24675426	2068	0	-	0	No	0	No	0	No	0	1
chr9	25126814	25127237	2069	0	-	0	No	0	No	0	No	1	0
chr9	25264860	25265298	2070	23	+	12.5465	Yes	81.7179	Yes	0	No	2	1
chr9	25627308	25627729	2072	0	+	0	No	0.150059	No	0	No	0	0
chr9	27637122	27637578	2073	0	+	0	No	0	No	0	No	1	0
chr9	27643195	27643595	2074	3	+	1.20705	No	0	No	0	No	2	0
chr9	28510728	28511176	2076	0	-	0	No	0	No	0	No	0	0
chr9	28512694	28513083	2079	2	-	0.00270439	No	0	No	0	No	1	0
chr9	28632913	28633305	2082	0	-	0	No	0	No	0	No	0	1
chr9	28822403	28822849	2083	0	+	0	No	0	No	0	No	0	0
chr9	29482076	29482439	2084	0	+	0	No	0	No	0	No	2	1
chr9	29802738	29803206	2086	1	-	0.00185184	No	0	No	0	No	1	0
chr9	30912111	30912553	2087	0	-	0	No	0	No	0	No	1	0
chr9	31233664	31234106	2088	0	-	0	No	0	No	0	No	2	0
chr9	31686894	31687307	2090	16	-	13.3039	Yes	0	No	0	No	2	0
chr9	32030022	32030470	2091	2	-	0.669859	No	0	No	0	No	1	0
chr9	32221276	32221718	2092	0	-	0	No	0	No	0	No	1	0
chr9	32352868	32353238	2093	2	-	0.00462868	No	0.670638	No	0	No	2	0
chr9	34677918	34678330	2094	0	+	0	No	0	No	0	No	1	0
chr9	35868146	35868560	2096	8	+	0.018427	Yes	0	No	0	No	1	0
chr9	36686719	36687106	2098	0	-	0	No	0	No	0	No	1	0
chr9	40636356	40636721	2100	0	+	0	No	0	No	0	No	1	0
chr9	40636831	40637214	2102	0	-	0	No	0	No	0	No	2	0
chr9	40640396	40640838	2103	0	-	0	No	0	No	0	No	1	0
chr9	43267399	43267764	2105	0	+	0	No	0	No	0	No	1	0
chr9	43267870	43268254	2107	0	-	0	No	0	No	0	No	2	0
chr9	63435578	63435943	2109	0	+	0	No	0	No	0	No	1	0
chr9	63436049	63436432	2111	0	-	0	No	0	No	0	No	2	0
chr9	63439614	63440056	2112	0	-	0	No	0	No	0	No	1	0
chr9	64759568	64759933	2114	0	+	0	No	0	No	0	No	1	0
chr9	64760037	64760420	2116	0	-	0	No	0	No	0	No	2	0
chr9	64763682	64764067	2118	0	-	0	No	0	No	0	No	1	0
chr9	65245057	65245422	2120	0	+	0	No	0	No	0	No	1	0
chr9	65245524	65245907	2122	0	-	0	No	0	No	0	No	2	0
chr9	65249093	65249540	2123	0	-	0	No	0	No	0	No	1	0
chr9	65772420	65772867	2124	0	+	0	No	0	No	0	No	1	0
chr9	65776053	65776436	2125	0	+	0	No	0	No	0	No	2	0
chr9	65776540	65776905	2127	0	-	0	No	0	No	0	No	1	0
chr9	69770400	69770884	2129	15	-	12.8013	Yes	0	No	0	No	2	0
chr9	72488073	72488451	2130	2	+	1.39178	No	0.126469	No	0	No	1	0
chr9	72725389	72725699	2132	2	-	0.132908	No	0	No	0	No	1	0
chr9	75791623	75792065	2134	0	+	0	No	0	No	0	No	1	0
chr9	78672187	78672626	2135	0	-	0	No	0	No	0	No	1	0
chr9	80979331	80979768	2136	0	-	0	No	0	No	0	No	0	0
chr9	83843915	83844347	2137	0	+	0	No	0	No	0	No	0	0
chr9	83847560	83847951	2139	0	+	0	No	0	No	0	No	0	0
chr9	85775591	85775987	2140	0	-	0	No	0	No	0	No	0	0
chr9	85779265	85779684	2142	0	-	0	No	0	No	0	No	0	0
chr9	87378144	87378580	2143	2	-	0.000938146	No	0	No	0	No	2	0
chr9	88561016	88561410	2144	5	+	3.84709	Yes	0	No	0	No	1	0
chr9	89159532	89159975	2146	0	-	0	No	0	No	0	No	0	0
chr9	90595428	90595817	2148	0	-	0	No	0	No	0	No	0	0
chr9	91086143	91086576	2149	2	+	0.00144027	No	0	No	0	No	1	0
chr9	91653608	91654007	2150	0	+	0	No	0	No	0	No	2	0
chr9	92352506	92352928	2152	0	-	0	No	0	No	0	No	1	1
chr9	93617608	93618028	2153	0	-	0	No	0	No	0	No	0	0
chr9	95886691	95887123	2154	0	+	0	No	0	No	0	No	1	0
chr9	97400859	97401257	2155	0	-	0	No	0	No	0	No	0	0
chr9	99290172	99290675	2156	0	-	0	No	0	No	0	No	1	0
chr9	100843871	100844329	2157	0	+	0	No	0	No	0	No	1	1
chr9	101179711	101180094	2158	0	+	0	No	0	No	0	No	0	1
chr9	101809352	101809719	2160	0	+	0	No	0	No	0.102318	No	1	0
chr9	102407702	102407969	2163	0	+	0	No	0	No	0	No	0	0
chr9	102607293	102607514	2165	0	-	0	No	0	No	0	No	0	0
chr9	102646697	102647076	2167	0	+	0	No	0	No	0	No	1	1
chr9	102806902	102807350	2169	0	-	0	No	0.126469	No	0	No	1	0
chr9	102813079	102813464	2171	0	-	0	No	0.089214	No	0	No	0	0
chr9	102839754	102840162	2173	0	-	0	No	0	No	0	No	0	0
chr9	103262872	103263264	2174	0	+	0	No	0	No	0	No	1	0
chr9	103754031	103754424	2175	2	+	0.223621	No	0	No	0	No	2	0
chr9	106103425	106103863	2177	3	+	1.17666	No	0	No	0	No	1	0
chr9	106727116	106727504	2179	0	-	0	No	0	No	0	No	0	0
chr9	107610393	107610763	2180	0	-	0	No	0	No	0	No	2	0
chr9	111090726	111091122	2181	1	+	1.18193	No	0	No	0	No	1	0
chr9	112373200	112373580	2182	0	-	0	No	0.150059	No	0	No	0	0
chr9	112376551	112376925	2185	0	-	0	No	0	No	0	No	0	0
chr9	115677675	115678119	2186	0	-	0	No	0	No	0	No	1	0
chr9	117835368	117835815	2187	10	+	3.02043	Yes	0	No	0	No	2	0
chr9	119667573	119668116	2188	0	-	0	No	0	No	0	No	1	0
chr9	122055243	122055633	2190	0	-	0	No	0	No	0	No	0	0
chr9	122438515	122438965	2191	0	-	0	No	0	No	0	No	1	0
chr9	123501597	123502034	2192	0	+	0	No	0	No	0	No	1	0
chr9	123694824	123695223	2193	0	+	0	No	0	No	0	No	1	0
chr9	126135782	126136217	2195	0	+	0	No	0	No	0	No	1	0
chr9	127026009	127026456	2196	0	-	0	No	0	No	0	No	0	0
chr9	131386768	131386992	2197	0	-	0	No	0	No	0	No	0	0
chr9	131387300	131387509	2198	1	-	0.456227	No	0	No	0	No	1	1
chr9	134647907	134648288	2199	2	+	0.00405876	No	22.4514	Yes	0	No	2	1
chr9	134877835	134878249	2201	0	+	0	No	0	No	0	No	1	0
chr9	137037576	137037963	2202	0	+	0	No	0	No	0	No	0	0
chr9	137357756	137358147	2205	0	-	0	No	0	No	0	No	0	0
chr9	138040403	138040884	2206	0	-	0	No	0	No	0	No	1	0
chr10	1837251	1837807	2207	0	+	0	No	0	No	0	No	1	0
chr10	4139847	4140298	2208	0	+	0	No	0	No	0	No	1	1
chr10	5115136	5115588	2209	0	-	0	No	0	No	0	No	1	0
chr10	9410921	9411315	2210	6	+	0.915651	Yes	0	No	0	No	2	0
chr10	13433339	13433730	2211	0	+	0	No	0	No	0	No	1	0
chr10	15138863	15139250	2213	0	+	0	No	0	No	0	No	2	0
chr10	15207235	15207733	2215	24	-	8.98532	Yes	0	No	0	No	1	0
chr10	16123835	16124275	2216	0	+	0	No	0.150059	No	0	No	0	0
chr10	16164981	16165423	2217	0	-	0	No	0	No	0	No	0	1
chr10	16177867	16178244	2218	0	-	0	No	0	No	0	No	0	0
chr10	17554504	17554913	2219	2	+	1.05594	No	0	No	0	No	1	0
chr10	19754441	19754990	2221	0	+	0	No	0	No	0.079143	No	1	0
chr10	25741225	25741618	2224	2	-	0.0220223	No	0	No	0	No	1	0
chr10	29444437	29444873	2225	0	-	0	No	0	No	0	No	0	0
chr10	30577591	30578029	2227	0	-	0	No	0	No	0	No	1	0
chr10	31163912	31164325	2229	0	-	0	No	0	No	0	No	1	0
chr10	32825221	32825593	2230	0	+	0	No	0	No	0	No	1	0
chr10	32829703	32830177	2232	0	+	0	No	0	No	0	No	0	1
chr10	34604189	34604581	2233	0	+	0	No	0.215683	No	0	No	1	0
chr10	42186769	42187210	2234	0	+	0	No	0	No	0	No	1	0
chr10	42190394	42190779	2235	0	+	0	No	0	No	0	No	2	0
chr10	42190952	42191364	2237	0	-	0	No	0	No	0	No	1	0
chr10	43023595	43024033	2239	0	-	0	No	0	No	0	No	1	0
chr10	43509420	43509879	2240	13	-	0.185962	Yes	0	No	0	No	1	1
chr10	43516426	43516879	2241	0	-	0	No	0	No	0	No	1	0
chr10	43812433	43812826	2244	0	-	0	No	0	No	0	No	2	0
chr10	45336527	45336967	2245	0	+	0	No	0	No	0	No	1	0
chr10	48990933	48991348	2247	0	-	0	No	0	No	0	No	1	0
chr10	48997301	48997769	2248	0	-	0	No	0	No	0	No	1	0
chr10	51406789	51407230	2249	2	-	0.577477	No	0	No	0	No	1	1
chr10	51410291	51410669	2251	0	-	0	No	0	No	0	No	0	0
chr10	53205053	53205386	2252	0	+	0	No	0	No	0	No	1	0
chr10	56672539	56672923	2254	0	+	0	No	0	No	0	No	1	0
chr10	57134850	57135334	2258	0	+	0	No	0	No	0	No	1	0
chr10	57140974	57141354	2259	0	+	0	No	0	No	0	No	1	0
chr10	57673344	57673595	2261	13	-	4.98784	Yes	0	No	0	No	1	1
chr10	58474482	58474954	2262	4	+	2.33842	No	0	No	0	No	1	0
chr10	60643120	60643500	2265	0	+	0	No	0	No	0	No	1	0
chr10	61375780	61376178	2267	1	+	0.0486098	No	0	No	0	No	2	0
chr10	61565587	61566017	2268	0	-	0	No	0	No	0	No	0	1
chr10	62825708	62826139	2270	1	+	0.00318035	No	0	No	0	No	0	0
chr10	65273566	65273950	2271	1	+	0.0256172	No	0	No	0	No	2	0
chr10	65761595	65761843	2273	0	-	0	No	0	No	0	No	1	0
chr10	67428587	67429016	2274	5	+	1.85808	Yes	0	No	0	No	1	1
chr10	71016727	71017230	2275	1	-	0.37222	No	0	No	0.079143	No	2	1
chr10	71023701	71024092	2276	0	-	0	No	0	No	0	No	1	0
chr10	71099413	71099839	2277	0	+	0	No	0	No	0	No	0	2
chr10	71219245	71219680	2278	0	-	0	No	0	No	0	No	1	0
chr10	81677040	81677293	2279	0	-	0	No	0	No	0	No	0	0
chr10	83436646	83437072	2280	0	+	0	No	0	No	0	No	1	0
chr10	83971192	83971632	2281	0	-	0	No	0	No	0	No	1	0
chr10	83977390	83977779	2283	0	-	0	No	0	No	0	No	2	0
chr10	85029710	85030148	2284	1	+	0.618049	No	0	No	0	No	2	0
chr10	85035743	85036113	2285	0	+	0	No	0	No	0	No	1	0
chr10	85088140	85088620	2287	0	-	0	No	0.089214	No	0	No	1	0
chr10	87602704	87603098	2289	2	+	0.00576054	No	0	No	0	No	1	0
chr10	88868056	88868444	2291	4	-	0.605866	No	0	No	0	No	1	0
chr10	90196070	90196445	2292	0	+	0	No	0	No	0	No	0	0
chr10	90605042	90605416	2295	0	-	0	No	0	No	0	No	1	0
chr10	90611056	90611478	2296	0	-	0	No	0	No	0	No	1	0
chr10	92372695	92373074	2297	2	+	0.257549	No	0	No	0	No	1	0
chr10	93228903	93229337	2299	1	-	0.065268	No	0	No	0	No	2	1
chr10	93235283	93235749	2300	13	-	5.56744	Yes	0	No	0	No	2	0
chr10	93962545	93962906	2302	0	-	0	No	0	No	0	No	1	1
chr10	96603295	96603671	2303	0	+	0	No	0	No	0	No	1	0
chr10	102910582	102910993	2305	0	+	0	No	0	No	0	No	1	0
chr10	104462190	104462633	2307	1	+	0.00142197	No	0	No	0	No	1	0
chr10	104468780	104469152	2308	0	-	0	No	0	No	0	No	1	0
chr10	105421730	105422114	2310	0	-	0	No	0	No	0	No	1	1
chr10	105859702	105860124	2311	0	+	0	No	0	No	0	No	0	0
chr10	107660466	107660844	2314	1	+	0.000841329	No	0	No	0	No	0	0
chr10	107664279	107664583	2317	0	+	0	No	0	No	0	No	0	0
chr10	107947965	107948328	2318	1	-	0.00523764	No	0	No	0	No	0	0
chr10	108429635	108430075	2319	19	-	5.50306	Yes	0	No	0	No	1	0
chr10	108432663	108433037	2321	0	-	0	No	0	No	0	No	1	0
chr10	109311962	109312423	2322	0	-	0	No	0	No	0	No	1	0
chr10	111253388	111253789	2323	0	+	0	No	0	No	0	No	0	0
chr10	111668233	111668619	2325	0	-	0	No	0	No	0	No	1	0
chr10	113942823	113943226	2326	0	-	0	No	0	No	0	No	2	0
chr10	115730738	115731196	2327	0	-	0	No	0	No	0	No	1	0
chr10	118631000	118631393	2330	1	-	0.00640431	No	0	No	0	No	1	1
chr10	120602573	120602897	2331	0	+	0	No	0	No	0	No	1	0
chr10	120732740	120733216	2333	0	+	0	No	0	No	0	No	1	0
chr10	121782620	121783054	2335	0	+	0	No	0	No	0	No	2	0
chr10	123814108	123814554	2336	0	+	0	No	0	No	0	No	0	0
chr10	123819795	123820241	2337	0	+	0	No	0	No	0	No	1	0
chr10	127557318	127557748	2338	0	+	0	No	0	No	0	No	1	0
chr10	127800016	127800448	2339	2	+	0.00236443	No	0	No	0	No	1	0
chr10	133495746	133496167	2340	0	-	0	No	0	No	0	No	0	0
chr10	133502509	133502939	2341	2	-	0.383547	No	0	No	0	No	2	1
chr11	2045836	2046234	2342	1	-	0.295256	No	0	No	0	No	2	0
chr11	5885789	5886194	2343	0	+	0	No	0	No	0	No	0	0
chr11	8621900	8622326	2345	1	+	0.261072	No	0	No	0	No	1	0
chr11	9771492	9771933	2347	0	-	0	No	0	No	0	No	1	0
chr11	13185458	13185888	2348	5	+	1.61137	Yes	0	No	0	No	2	0
chr11	13643809	13644251	2349	9	-	3.10125	Yes	0	No	0	No	2	0
chr11	14007234	14007683	2350	0	-	0	No	0	No	0	No	1	0
chr11	14365526	14366006	2351	0	-	0	No	0	No	0	No	2	0
chr11	14408327	14408758	2352	1	+	0.233666	No	0	No	0	No	1	0
chr11	14451032	14451244	2353	0	+	0	No	0	No	0	No	0	0
chr11	14451546	14451787	2354	0	+	0	No	0	No	0	No	0	0
chr11	15463404	15463613	2355	0	-	0	No	0	No	0	No	0	0
chr11	20803683	20804118	2356	0	+	0	No	0	No	0	No	1	0
chr11	23075418	23075808	2357	19	+	5.39257	Yes	0	No	0	No	2	1
chr11	23380033	23380468	2359	1	-	0.000539062	No	0	No	0	No	0	0
chr11	24773945	24774332	2360	0	+	0	No	0	No	0	No	2	0
chr11	28159890	28160331	2366	1	+	0.327752	No	0.276528	No	0	No	2	0
chr11	28971261	28971708	2367	0	+	0	No	0	No	0	No	1	0
chr11	29088646	29089088	2368	3	+	2.41764	No	0	No	0	No	2	0
chr11	29114821	29115252	2369	0	-	0	No	0.215683	No	0	No	1	0
chr11	29850168	29850591	2370	0	+	0	No	0	No	0	No	0	0
chr11	29910526	29910907	2371	6	+	1.97807	Yes	0	No	0	No	2	1
chr11	34912451	34912884	2372	3	+	1.29758	No	0	No	0	No	1	1
chr11	38538170	38538599	2373	0	-	0	No	0	No	0	No	0	0
chr11	39131120	39131495	2374	0	+	0	No	0	No	0	No	0	0
chr11	42280750	42281130	2378	0	-	0	No	0	No	0	No	2	0
chr11	42385710	42385964	2379	2	+	0.181283	No	0	No	0	No	1	1
chr11	42388266	42388705	2380	32	+	24.8671	Yes	0	No	0	No	2	1
chr11	42997737	42998144	2382	1	-	0.00204193	No	0	No	0	No	2	0
chr11	43179104	43179550	2383	1	-	0.33326	No	0	No	0	No	0	0
chr11	43896300	43896693	2385	7	-	3.14989	Yes	0	No	0	No	2	0
chr11	44414859	44415261	2386	3	+	0.48404	No	0	No	0	No	2	1
chr11	44544092	44544464	2388	0	+	0	No	0	No	0	No	1	0
chr11	44550255	44550636	2389	0	+	0	No	0	No	0	No	1	0
chr11	47031757	47032181	2391	1	-	0.000364403	No	0	No	0	No	0	0
chr11	49468468	49468843	2392	0	+	0	No	0	No	0	No	1	0
chr11	49542450	49542843	2397	0	-	0	No	0	No	0	No	0	0
chr11	58787263	58787671	2398	0	+	0	No	0	No	0	No	2	0
chr11	59276040	59276280	2399	0	+	0	No	0	No	0	No	0	0
chr11	59282226	59282588	2400	0	+	0	No	0	No	0	No	0	0
chr11	63969365	63969803	2402	1	-	0.00498102	No	0	No	0	No	1	0
chr11	65753280	65753654	2403	33	+	25.7561	Yes	0	No	0	No	1	0
chr11	69170395	69170828	2404	0	+	0	No	0	No	0	No	2	0
chr11	69806748	69807139	2405	0	+	0	No	0	No	0	No	1	0
chr11	71355535	71355929	2408	0	-	0	No	0	No	0	No	1	0
chr11	75018272	75018708	2409	0	+	0	No	0	No	0	No	1	0
chr11	78025156	78025546	2412	0	-	0	No	0	No	0	No	2	0
chr11	78618483	78618927	2413	0	+	0	No	0	No	0	No	1	0
chr11	78624549	78624985	2414	0	+	0	No	0	No	0	No	1	0
chr11	79124202	79124616	2415	0	+	0	No	0	No	0	No	2	0
chr11	79137922	79138339	2417	11	+	6.10179	Yes	0	No	0	No	2	0
chr11	81170864	81171352	2419	0	-	0	No	0	No	0	No	1	0
chr11	81172589	81172965	2421	0	-	0	No	0	No	0	No	0	0
chr11	81388234	81388634	2422	5	-	1.88268	Yes	0	No	0	No	2	0
chr11	82372415	82372808	2423	0	+	0	No	0	No	0	No	0	1
chr11	82568833	82569284	2424	0	-	0	No	0	No	0	No	1	0
chr11	82624502	82624906	2425	12	+	2.19541	Yes	0	No	0	No	1	0
chr11	82660389	82660822	2426	1	-	0.000654893	No	0	No	0	No	2	0
chr11	83082162	83082612	2427	0	-	0	No	0	No	0	No	0	0
chr11	83503423	83503851	2432	1	-	0.0537987	No	0	No	0	No	0	0
chr11	83507807	83508193	2434	0	-	0	No	0	No	0	No	0	0
chr11	83576923	83577329	2435	0	+	0	No	0	No	0	No	2	0
chr11	85156888	85157293	2437	1	+	0.0063132	No	0	No	0	No	0	0
chr11	85162819	85163206	2438	1	+	0.00196468	No	0	No	0	No	0	0
chr11	89081669	89082062	2440	0	+	0	No	0	No	0	No	0	0
chr11	89156296	89156674	2443	0	-	0	No	0	No	0	No	1	0
chr11	92006574	92006929	2444	0	+	0	No	0	No	0	No	0	0
chr11	92987230	92987642	2446	0	-	0	No	0	No	0	No	1	0
chr11	93804036	93804444	2448	0	-	0	No	0	No	0	No	1	0
chr11	94115770	94116161	2452	11	-	7.04257	Yes	0.126469	No	0.102318	No	2	1
chr11	95324097	95324477	2453	12	+	4.60315	Yes	1.4452	No	0	No	2	0
chr11	97317541	97317987	2455	0	+	0	No	0	No	0	No	1	1
chr11	97322925	97323323	2456	0	+	0	No	0	No	0	No	1	0
chr11	97788605	97789053	2458	0	-	0	No	0	No	0	No	0	0
chr11	100903755	100904145	2460	0	-	0	No	0	No	0	No	1	1
chr11	103621254	103621677	2461	4	+	1.65008	No	0	No	0	No	1	1
chr11	107231913	107232353	2462	8	-	5.22082	Yes	0	No	0	No	2	0
chr11	107237787	107238231	2463	0	-	0	No	0	No	0	No	1	0
chr11	107977837	107978293	2464	30	+	19.4299	Yes	0	No	0	No	2	0
chr11	108860970	108861231	2466	10	+	3.36521	Yes	0	No	0	No	2	0
chr11	109136055	109136477	2467	17	+	8.09663	Yes	0	No	0	No	2	0
chr11	109495934	109496322	2470	3	-	0.299091	No	0	No	0	No	2	0
chr11	109502598	109503010	2472	1	-	0.331748	No	0.276528	No	0	No	1	1
chr11	110925968	110926411	2473	0	+	0	No	0	No	0	No	0	0
chr11	113581950	113582337	2474	0	+	0	No	46.5588	Yes	0	No	1	1
chr11	113585753	113586158	2475	2	+	0.899146	No	0.768739	No	0	No	2	1
chr11	116721254	116721711	2476	0	-	0	No	0	No	0	No	1	0
chr11	122009865	122010303	2477	16	+	5.89886	Yes	0	No	0	No	2	2
chr11	122015977	122016384	2478	0	+	0	No	0	No	0	No	2	1
chr11	124428421	124428854	2480	0	-	0	No	0	No	0	No	2	0
chr11	125028849	125029294	2481	0	-	0	No	0	No	0	No	1	0
chr11	125034862	125035326	2482	0	-	0	No	0	No	0	No	1	0
chr11	125850164	125850554	2484	0	-	0	No	0	No	0	No	1	0
chr11	128385095	128385471	2486	0	-	0	No	0	No	0	No	1	0
chr11	129564385	129564790	2489	0	-	0	No	0	No	0	No	0	1
chr11	131596770	131597207	2490	0	-	0	No	0	No	0	No	1	0
chr11	132375039	132375479	2491	1	+	0.192044	No	0	No	0	No	1	0
chr11	132381082	132381526	2492	0	+	0	No	0	No	0	No	0	0
chr11	133680603	133680937	2493	1	+	0.982338	No	0.150059	No	0	No	1	1
chr11	134825105	134825439	2496	1	-	0.000177743	No	0	No	0	No	1	0
chr12	5381727	5382114	2501	6	-	2.76729	Yes	0	No	0	No	1	1
chr12	5818087	5818443	2502	1	+	0.000865707	No	0	No	0	No	0	1
chr12	8004689	8005065	2506	6	+	1.08569	Yes	0	No	0	No	1	0
chr12	12321509	12321895	2508	0	+	0	No	0	No	0	No	2	0
chr12	12344239	12344475	2510	0	+	0	No	0	No	0	No	0	0
chr12	14292853	14293284	2513	34	-	8.42457	Yes	0	No	0	No	2	0
chr12	14299779	14300222	2514	5	-	4.09594	Yes	0.365742	No	0	No	2	1
chr12	14331175	14331557	2515	0	+	0	No	0	No	0	No	0	0
chr12	14338046	14338445	2516	1	+	0.325498	No	0	No	0	No	1	1
chr12	14482263	14482762	2518	4	-	0.429237	No	0	No	0	No	2	0
chr12	14488249	14488650	2520	0	-	0	No	0	No	0	No	2	1
chr12	14494955	14495305	2522	0	-	0	No	0	No	0	No	2	0
chr12	15554448	15554845	2524	1	-	0.00146167	No	0	No	0	No	1	0
chr12	25477836	25478213	2525	0	-	0	No	0	No	0	No	2	0
chr12	26325170	26325548	2526	0	+	0	No	0	No	0	No	1	0
chr12	28964680	28965116	2528	0	-	0	No	0.089214	No	0	No	2	0
chr12	29473687	29474060	2529	0	+	0	No	0	No	0	No	2	1
chr12	29740211	29740669	2531	74	+	59.4591	Yes	0	No	0	No	2	1
chr12	29933442	29933885	2532	11	-	1.42294	Yes	0	No	0	No	2	0
chr12	29988509	29988952	2533	2	+	1.22304	No	0	No	0	No	0	0
chr12	31630759	31631143	2535	11	-	7.56174	Yes	0	No	0	No	1	0
chr12	33807340	33807734	2536	0	-	0	No	0	No	0	No	2	1
chr12	38786223	38786647	2537	0	+	0	No	0	No	0	No	2	0
chr12	40737362	40737759	2539	1	-	0.000539062	No	0	No	0	No	1	1
chr12	44042384	44042761	2540	0	+	0	No	0.150059	No	0	No	0	1
chr12	45039993	45040433	2544	0	+	0	No	0	No	0	No	1	0
chr12	46860881	46861345	2545	1	-	0.000533227	No	0	No	0	No	1	0
chr12	46866942	46867418	2546	0	-	0	No	0	No	0	No	1	1
chr12	47354758	47355156	2548	0	-	0	No	0	No	0	No	1	0
chr12	48603983	48604379	2549	0	+	0	No	0	No	0	No	2	0
chr12	50156899	50157335	2551	0	+	0	No	0	No	0	No	0	0
chr12	50325602	50326044	2552	3	+	0.506386	No	0	No	0	No	2	0
chr12	51707247	51707707	2553	17	-	0.0633526	Yes	0	No	0	No	0	0
chr12	55870685	55870919	2554	0	+	0	No	0	No	0	No	1	1
chr12	55871220	55871432	2555	1	+	1.39205	No	0	No	0	No	0	0
chr12	56404751	56405145	2556	0	+	0	No	0	No	0	No	2	0
chr12	56858930	56859368	2557	0	+	0	No	0	No	0	No	0	0
chr12	59154351	59154795	2558	2	-	1.14262	No	0	No	0	No	2	0
chr12	59519616	59519989	2561	0	-	0	No	0	No	0	No	2	0
chr12	59569474	59569921	2562	31	-	20.2079	Yes	0	No	0	No	2	0
chr12	59573137	59573542	2563	0	-	0	No	0	No	0	No	2	0
chr12	61197025	61197465	2566	0	-	0	No	0	No	0	No	2	0
chr12	61233606	61233987	2568	24	-	11.5227	Yes	0	No	0	No	2	1
chr12	61249674	61250098	2569	4	-	1.05104	No	0	No	0.079143	No	1	0
chr12	62031094	62031570	2570	0	+	0	No	0	No	0.102318	No	1	0
chr12	64129133	64129564	2571	0	-	0	No	0	No	0	No	1	0
chr12	64135793	64136221	2572	0	-	0	No	0	No	0	No	0	1
chr12	64340013	64340411	2574	0	-	0	No	0	No	0	No	0	0
chr12	64346076	64346520	2575	1	-	0.0759653	No	0	No	0	No	2	0
chr12	66340557	66341002	2576	0	-	0	No	0	No	0	No	1	0
chr12	67575034	67575399	2577	0	+	0	No	0	No	0	No	0	0
chr12	67782098	67782493	2579	0	+	0	No	0	No	0	No	1	0
chr12	69722822	69723258	2580	0	-	0	No	0	No	0	No	1	0
chr12	73071564	73072052	2581	0	+	0	No	0	No	0	No	1	0
chr12	73825649	73826028	2582	0	+	0	No	0	No	0	No	1	0
chr12	73860541	73860995	2586	0	-	0	No	0	No	0	No	1	0
chr12	74275776	74276228	2587	7	+	2.33612	Yes	0	No	0	No	2	0
chr12	74281949	74282432	2588	3	+	1.50156	No	0	No	0	No	2	0
chr12	75012442	75012804	2589	0	+	0	No	0	No	0	No	1	0
chr12	75020729	75021169	2590	28	+	22.636	Yes	0	No	0	No	2	0
chr12	76338642	76339083	2592	14	-	8.47269	Yes	0	No	0	No	2	1
chr12	76498928	76499304	2593	7	+	5.4007	Yes	0	No	0	No	2	0
chr12	77114431	77114871	2595	0	-	0	No	0	No	0	No	1	0
chr12	79499639	79500000	2596	0	-	0	No	0	No	0	No	1	0
chr12	80782251	80782661	2597	0	+	0	No	0	No	0	No	1	0
chr12	81565308	81565559	2599	0	+	0	No	0	No	0	No	0	0
chr12	81761871	81762250	2600	0	+	0	No	0	No	0	No	1	0
chr12	81767744	81768142	2601	1	+	0.001036	No	0	No	0	No	1	0
chr12	81907190	81907592	2603	0	-	0	No	0	No	0	No	2	0
chr12	81933841	81934207	2605	0	-	0	No	0	No	0	No	1	0
chr12	81942031	81942476	2606	0	-	0	No	0	No	0	No	1	0
chr12	83719368	83719740	2607	2	+	0.0353434	No	0	No	0	No	1	0
chr12	83725995	83726439	2609	0	+	0	No	0	No	0	No	0	0
chr12	84401803	84402176	2610	0	+	0	No	0	No	0	No	2	0
chr12	84407746	84408177	2611	0	+	0	No	0	No	0	No	1	0
chr12	84699228	84699696	2612	0	+	0	No	0	No	0	No	2	0
chr12	85167242	85167786	2613	0	-	0	No	0	No	0	No	0	0
chr12	85937012	85937456	2614	0	+	0	No	0	No	0	No	2	0
chr12	85939894	85940309	2615	0	+	0	No	0	No	0	No	1	0
chr12	86076850	86077199	2618	0	-	0	No	0	No	0	No	1	0
chr12	86566138	86566569	2619	0	+	0	No	0	No	0	No	1	0
chr12	87806175	87806609	2621	13	-	4.02572	Yes	0	No	7.11062	Yes	1	0
chr12	88211973	88212394	2623	0	-	0	No	0	No	0	No	2	0
chr12	88969916	88970451	2624	0	+	0	No	0.150059	No	0	No	0	0
chr12	90434293	90434750	2625	1	+	0.00162749	No	0	No	0	No	1	0
chr12	90874460	90874823	2626	0	+	0	No	0.089214	No	0	No	2	0
chr12	90880592	90880979	2629	0	+	0	No	0	No	0	No	2	0
chr12	91569152	91569609	2631	0	+	0	No	0	No	0	No	1	0
chr12	91875049	91875497	2632	0	+	0	No	0	No	0	No	0	0
chr12	92715066	92715447	2634	22	-	9.07792	Yes	0	No	0	No	2	0
chr12	100998000	100998379	2635	1	+	0.0503356	No	0	No	0	No	1	0
chr12	102280541	102280998	2637	1	-	0.00214503	No	0	No	0	No	1	0
chr12	105602975	105603416	2638	0	-	0	No	0	No	0	No	1	0
chr12	105609756	105610142	2640	1	-	0.000431266	No	0	No	0	No	1	0
chr12	105678700	105679121	2641	0	+	0	No	0	No	0	No	1	0
chr12	105684960	105685387	2643	2	+	1.10588	No	0.150059	No	0	No	0	0
chr12	107123630	107124052	2644	7	+	2.4745	Yes	0.089214	No	0	No	2	0
chr12	108332375	108332804	2645	2	+	1.27884	No	0	No	0	No	1	1
chr12	114180046	114180460	2646	0	+	0	No	0	No	0	No	0	1
chr12	115441263	115441751	2647	5	+	0.0103706	Yes	0	No	0	No	1	0
chr12	117650022	117650446	2648	0	+	0	No	0	No	0	No	2	1
chr12	117656619	117656922	2649	0	+	0	No	0	No	0	No	1	0
chr12	121254828	121255209	2651	0	+	0	No	0	No	0	No	1	1
chr12	125147720	125148166	2653	0	+	0	No	0	No	0	No	1	0
chr12	127472803	127473267	2654	0	+	0	No	0	No	0	No	1	0
chr12	127479763	127480159	2655	0	+	0	No	0	No	0	No	1	0
chr12	127489950	127490164	2656	0	-	0	No	0	No	0	No	0	0
chr12	127796456	127796838	2658	1	+	0.128642	No	0	No	0	No	1	0
chr12	130180059	130180480	2660	0	-	0	No	0	No	0	No	1	0
chr12	131512696	131513084	2661	2	+	0.00547386	No	0	No	0	No	0	0
chr13	21793851	21794259	2665	15	-	6.80298	Yes	0	No	0	No	1	0
chr13	22678146	22678551	2666	1	+	0.0648658	No	0	No	0	No	2	0
chr13	23313726	23314148	2668	8	+	3.07637	Yes	0	No	0	No	2	0
chr13	23317811	23318271	2669	4	+	3.94048	No	0	No	0	No	0	0
chr13	26194601	26195043	2670	0	-	0	No	0	No	0	No	1	0
chr13	27277302	27277747	2671	1	-	0.00675422	No	0	No	0	No	1	0
chr13	32865708	32866134	2672	0	+	0	No	0	No	0	No	2	0
chr13	33293542	33293990	2673	0	+	0	No	0	No	0	No	0	0
chr13	34669749	34670137	2674	0	+	0	No	0	No	0	No	1	0
chr13	35739061	35739413	2677	0	+	0	No	0	No	0	No	2	0
chr13	37086737	37087175	2679	0	-	0	No	0	No	0	No	1	0
chr13	38161379	38161776	2680	0	+	0	No	0	No	0	No	1	0
chr13	38580381	38580765	2682	67	-	34.0722	Yes	0	No	0	No	2	0
chr13	39231739	39232127	2684	0	-	0	No	0	No	0	No	1	1
chr13	40282603	40282974	2686	0	-	0	No	0	No	0	No	0	0
chr13	40872613	40872997	2687	1	+	0.0986311	No	0	No	0	No	2	1
chr13	41862976	41863394	2689	1	+	0.000795493	No	0	No	0	No	1	0
chr13	43926857	43927225	2693	0	-	0	No	0	No	0	No	2	0
chr13	45753185	45753625	2694	0	-	0	No	0	No	0	No	2	1
chr13	45759254	45759670	2695	5	-	1.15597	Yes	0	No	0	No	2	0
chr13	47662563	47662792	2696	0	+	0	No	0	No	0	No	2	0
chr13	49092402	49092606	2698	0	-	0	No	0.126469	No	0	No	2	0
chr13	52043894	52044316	2699	0	+	0	No	0.126469	No	0	No	1	0
chr13	54403330	54403750	2700	0	+	0	No	0	No	0	No	1	0
chr13	54876518	54876932	2701	7	+	1.56269	Yes	0	No	0	No	1	0
chr13	55036670	55037058	2703	0	+	0	No	0	No	0	No	1	0
chr13	55445848	55446253	2705	8	+	9.70481	Yes	0	No	0	No	2	0
chr13	55452354	55452747	2707	1	+	0.0627653	No	0	No	0	No	1	0
chr13	55591975	55592378	2709	0	-	0	No	0	No	0	No	1	1
chr13	55773621	55774012	2710	0	+	0	No	0	No	0	No	1	0
chr13	55774158	55774539	2712	0	+	0	No	0	No	0	No	1	0
chr13	56059206	56059491	2717	0	-	0	No	0.342151	No	0	No	1	0
chr13	56557406	56557789	2719	0	-	0	No	0	No	0	No	0	0
chr13	58830319	58830774	2721	0	-	0	No	0	No	0	No	1	0
chr13	60495911	60496288	2722	0	+	0	No	0	No	0	No	1	0
chr13	60994723	60995005	2725	0	-	0	No	0	No	0	No	1	0
chr13	63441582	63441968	2726	2	+	0.494387	No	0	No	0	No	1	0
chr13	63444767	63445165	2728	0	+	0	No	0	No	0	No	0	0
chr13	63484123	63484499	2730	0	+	0	No	0	No	0	No	2	0
chr13	63487149	63487535	2732	0	+	0	No	0	No	0	No	1	0
chr13	64102618	64103162	2734	0	+	0	No	0	No	0	No	0	0
chr13	64750982	64751363	2737	1	-	0.178098	No	0	No	0	No	1	0
chr13	65914012	65914441	2740	7	+	4.79856	Yes	0.089214	No	0	No	1	1
chr13	67337881	67338288	2741	0	+	0	No	0	No	0	No	0	0
chr13	68963411	68963816	2746	0	-	0	No	0	No	0	No	1	0
chr13	69406988	69407363	2747	0	-	0	No	0	No	0	No	0	0
chr13	69499136	69499563	2748	11	-	2.60316	Yes	0	No	0	No	1	0
chr13	69505579	69505954	2750	0	-	0	No	0	No	0	No	1	0
chr13	70380138	70380414	2751	0	-	0	No	0	No	0	No	0	1
chr13	70407027	70407423	2753	8	+	2.71049	Yes	0	No	0	No	1	0
chr13	71343404	71343808	2755	0	-	0	No	0	No	0	No	1	0
chr13	74808893	74809282	2756	0	+	0	No	0	No	0	No	1	0
chr13	78150436	78150696	2758	0	+	0	No	0	No	0	No	2	0
chr13	79014511	79014934	2760	2	+	0.00184093	No	0	No	0	No	2	0
chr13	79110179	79110581	2761	0	+	0	No	0	No	0	No	1	0
chr13	79509627	79510078	2763	0	-	0	No	0	No	0	No	0	0
chr13	80061901	80062282	2765	0	-	0	No	0	No	0	No	0	0
chr13	81285787	81286176	2768	4	-	1.40787	No	0	No	0	No	2	0
chr13	82056994	82057386	2769	0	-	0	No	0.089214	No	0	No	0	0
chr13	82493562	82493889	2770	0	-	0	No	0	No	0	No	0	0
chr13	82970310	82970689	2773	0	-	0	No	0	No	0	No	2	0
chr13	84246047	84246498	2774	0	-	0	No	0	No	0.079143	No	1	1
chr13	86048692	86049088	2777	0	-	0	No	0	No	0	No	0	1
chr13	86440936	86441192	2779	0	-	0	No	0	No	0	No	2	0
chr13	87206234	87206671	2780	2	-	0.590542	No	0	No	0	No	1	0
chr13	87341163	87341393	2782	0	-	0	No	0	No	0	No	0	0
chr13	87341385	87341702	2783	0	+	0	No	0	No	0	No	1	0
chr13	89594452	89594879	2785	0	+	0	No	0	No	0	No	2	1
chr13	89597659	89598052	2786	0	+	0	No	0	No	0	No	1	1
chr13	90646289	90646674	2788	9	-	3.11025	Yes	0	No	0	No	2	0
chr13	90706715	90707091	2789	7	+	1.8688	Yes	0	No	0	No	1	1
chr13	90754785	90755223	2791	0	-	0	No	0	No	0	No	2	0
chr13	91831109	91831499	2794	5	-	1.55875	Yes	0	No	0	No	1	1
chr13	94522109	94522548	2796	0	+	0	No	0	No	0	No	2	0
chr13	94582537	94582975	2797	0	+	0	No	0	No	0	No	0	0
chr13	96928843	96929276	2798	0	-	0	No	0	No	0	No	1	1
chr13	97166393	97166782	2799	0	+	0	No	0	No	0	No	1	0
chr13	97324546	97325088	2801	0	-	0	No	0	No	0	No	1	0
chr13	97536031	97536458	2802	5	-	1.55784	Yes	0	No	0	No	2	1
chr13	97587407	97587840	2803	0	-	0	No	0	No	0	No	0	0
chr13	97596001	97596255	2804	0	-	0	No	0	No	0	No	2	0
chr13	97767562	97768007	2805	0	-	0	No	0	No	0	No	2	0
chr13	97773517	97773951	2806	4	-	0.111877	No	0	No	0	No	1	0
chr13	100882395	100882840	2807	4	+	0.00644938	No	0	No	0	No	1	0
chr13	101006690	101007129	2808	1	-	0.000364403	No	0	No	0	No	0	1
chr13	101973428	101973873	2809	2	-	0.23236	No	0	No	0	No	1	0
chr13	103586897	103587296	2810	1	-	0.506436	No	0	No	0	No	1	1
chr13	103766818	103767232	2812	1	-	0.394274	No	0.252937	No	0	No	1	1
chr13	103942946	103943345	2813	0	+	0	No	0	No	0	No	1	0
chr13	104036419	104036849	2815	0	-	0	No	0	No	0	No	0	1
chr13	105592487	105592879	2818	0	-	0	No	0	No	0	No	1	0
chr13	106650211	106650602	2819	1	+	0.267816	No	0	No	0	No	1	0
chr13	109217513	109217784	2823	0	+	0	No	0	No	0	No	1	0
chr13	109218915	109219327	2824	0	-	0	No	0	No	0	No	2	0
chr13	109225059	109225445	2826	0	-	0	No	0	No	0.102318	No	1	1
chr13	109342946	109343330	2828	0	+	0	No	0	No	0	No	0	0
chr13	109891777	109892155	2832	0	-	0	No	0	No	0	No	1	0
chr13	109952007	109952409	2833	0	+	0	No	0	No	0	No	1	0
chr13	110709556	110709797	2835	0	+	0	No	0	No	0	No	0	0
chr13	111221851	111222200	2837	0	-	0	No	0	No	0	No	1	1
chr14	20567487	20567838	2839	0	+	0	No	0	No	0	No	0	0
chr14	20573123	20573538	2840	7	+	1.03573	Yes	0	No	0	No	2	0
chr14	21568998	21569438	2842	9	-	4.07042	Yes	0	No	0	No	2	0
chr14	23655361	23655814	2843	12	-	7.93304	Yes	0	No	0	No	2	0
chr14	25281050	25281546	2844	0	-	0	No	0	No	0	No	1	0
chr14	25287041	25287433	2846	0	-	0	No	0	No	0	No	0	0
chr14	25611160	25611576	2847	2	-	0.453332	No	0	No	0	No	2	1
chr14	27117712	27118213	2848	1	-	0.268536	No	0	No	0	No	2	0
chr14	27122467	27122925	2849	0	-	0	No	0	No	0	No	1	0
chr14	28114950	28115344	2850	0	+	0	No	0	No	0	No	0	0
chr14	29170824	29171264	2853	0	+	0	No	0	No	0	No	1	0
chr14	29176239	29176730	2854	0	+	0	No	0	No	0	No	1	0
chr14	32363301	32363845	2855	0	-	0	No	0	No	0	No	0	0
chr14	36135930	36136328	2858	2	-	0.00763845	No	0	No	0	No	1	0
chr14	38720969	38721424	2859	2	-	0.00428943	No	0	No	0	No	1	0
chr14	39807697	39808210	2860	0	-	0	No	0	No	0	No	0	1
chr14	39893201	39893669	2861	1	+	0.00152064	No	0	No	0	No	1	0
chr14	39899252	39899635	2862	3	+	0.764714	No	0	No	0	No	2	0
chr14	40740771	40741253	2864	1	-	0.243282	No	0	No	0	No	0	0
chr14	41233920	41234323	2865	1	-	0.0162749	No	0	No	0	No	2	0
chr14	41239946	41240418	2866	0	-	0	No	0	No	0	No	2	0
chr14	42054884	42055307	2867	0	+	0	No	0	No	0	No	1	0
chr14	43030241	43030674	2868	0	+	0	No	0	No	0	No	1	0
chr14	43133570	43134012	2869	2	+	2.28325	No	0	No	0	No	1	0
chr14	45652504	45652950	2872	18	+	11.1552	Yes	0	No	0.84572	No	2	1
chr14	45925611	45926063	2873	0	+	0	No	0	No	0	No	1	0
chr14	48038869	48039307	2874	0	+	0	No	0	No	0	No	2	0
chr14	49223949	49224358	2876	1	-	0.00185184	No	0.089214	No	0	No	0	0
chr14	52443007	52443452	2877	1	+	0.0011126	No	0	No	0	No	1	0
chr14	52693217	52693551	2878	0	+	0	No	0	No	0.079143	No	1	0
chr14	53556695	53557111	2879	0	+	0	No	0	No	0	No	0	0
chr14	54847301	54847725	2880	1	+	0.128767	No	0.126469	No	0	No	2	0
chr14	55507535	55507950	2881	0	-	0	No	0	No	0	No	1	0
chr14	56045228	56045557	2882	0	-	0	No	0	No	0	No	1	0
chr14	57327103	57327542	2883	0	-	0	No	0	No	0	No	2	0
chr14	57335135	57335555	2884	0	-	0	No	0	No	0	No	1	0
chr14	57720597	57720979	2885	1	+	0.000924991	No	0	No	0	No	1	0
chr14	57726729	57727191	2887	0	+	0	No	0	No	0	No	0	0
chr14	59454009	59454386	2888	0	+	0	No	0	No	0	No	2	0
chr14	60237216	60237655	2889	1	+	0.0146474	No	0	No	0	No	2	0
chr14	62671726	62672169	2890	12	+	3.39018	Yes	0	No	0	No	1	1
chr14	62857403	62857868	2891	0	-	0	No	0	No	0	No	1	0
chr14	63795104	63795576	2892	0	+	0	No	0	No	0	No	1	0
chr14	65977739	65978111	2893	0	+	0	No	0	No	0	No	1	0
chr14	66456945	66457376	2895	0	+	0	No	0	No	0	No	1	1
chr14	68072285	68072668	2896	0	-	0	No	0	No	0	No	1	0
chr14	69821880	69822313	2897	1	-	0.0140627	No	0	No	0	No	2	0
chr14	69827434	69827821	2899	0	-	0	No	0	No	0	No	1	1
chr14	70431964	70432231	2900	1	-	0.000333768	No	0	No	0	No	1	1
chr14	70443477	70443812	2902	0	-	0	No	0	No	0	No	1	0
chr14	71459382	71459859	2903	0	-	0	No	0	No	0	No	0	0
chr14	71465707	71466120	2904	0	-	0	No	0	No	0	No	2	0
chr14	71936110	71936515	2906	17	-	19.9924	Yes	0	No	0	No	2	0
chr14	71941444	71941877	2907	5	-	2.85497	Yes	0	No	0	No	1	0
chr14	71956358	71956800	2909	4	-	0.37284	No	0	No	0	No	2	0
chr14	80224809	80225246	2910	0	-	0	No	0	No	0	No	1	0
chr14	80230830	80231256	2911	9	-	1.25856	Yes	0	No	0	No	1	0
chr14	80560511	80560949	2912	0	+	0	No	0	No	0	No	1	0
chr14	80754935	80755378	2913	0	+	0	No	0	No	1.63809	No	1	0
chr14	82674383	82674813	2914	0	+	0	No	0	No	0	No	1	0
chr14	83351967	83352443	2916	7	+	2.63385	Yes	0	No	0	No	2	1
chr14	85260793	85261253	2919	14	-	9.64223	Yes	0	No	0	No	2	1
chr14	85263203	85263704	2920	8	-	5.01475	Yes	0	No	0	No	2	1
chr14	85927830	85928272	2922	0	-	0	No	0	No	0	No	1	0
chr14	85933720	85934155	2923	3	-	0.0404603	No	0	No	0	No	1	0
chr14	86415710	86416099	2925	0	-	0	No	0	No	0	No	2	0
chr14	87083951	87084405	2926	0	-	0	No	0	No	0	No	1	0
chr14	88412256	88412687	2927	0	-	0	No	0	No	0	No	1	0
chr14	93827938	93828388	2928	0	-	0	No	0	No	0	No	2	0
chr14	93863674	93864131	2929	1	-	0.00117189	No	0	No	0	No	1	0
chr14	95582727	95583135	2931	0	-	0	No	0	No	0	No	1	1
chr14	98058652	98059005	2932	0	+	0	No	0	No	0	No	0	0
chr15	29215184	29215568	2935	0	+	0	No	0	No	0	No	1	0
chr15	29607866	29608255	2938	2	-	0.115978	No	0	No	0	No	2	0
chr15	31802142	31802548	2940	0	-	0	No	0	No	0	No	2	0
chr15	34463511	34463941	2941	1	+	0.0315308	No	0	No	0	No	2	0
chr15	34630803	34631251	2942	0	-	0	No	0	No	0	No	2	0
chr15	36336730	36337108	2943	0	+	0	No	0	No	0	No	0	0
chr15	38014898	38015270	2945	22	-	15.2183	Yes	3.01515	No	0	No	2	0
chr15	38095380	38095794	2946	0	-	0	No	0	No	0	No	1	1
chr15	39524880	39525325	2947	0	-	0	No	0	No	0	No	0	0
chr15	40146412	40146880	2948	0	-	0	No	0	No	0	No	0	0
chr15	42802722	42803159	2949	0	+	0	No	0	No	0	No	0	0
chr15	44369865	44370272	2950	0	-	0	No	0	No	0	No	0	0
chr15	46980488	46980891	2951	0	+	0	No	0	No	0	No	1	0
chr15	47357474	47357824	2952	0	-	0	No	0.276528	No	0	No	1	0
chr15	48347707	48348117	2953	3	-	1.22884	No	0.150059	No	0	No	1	2
chr15	48876478	48876908	2955	5	-	1.05603	Yes	0	No	0	No	2	0
chr15	55484602	55485049	2956	1	-	0.0359015	No	0	No	0	No	1	0
chr15	58210595	58210949	2957	0	+	0	No	0	No	0	No	1	0
chr15	60304802	60305256	2959	0	-	0	No	0	No	0	No	1	2
chr15	61540764	61541191	2960	0	+	0	No	0	No	0	No	1	0
chr15	62371911	62372296	2961	0	+	0	No	0	No	0	No	1	1
chr15	68038162	68038605	2962	0	-	0	No	0	No	0	No	1	0
chr15	69785447	69785883	2964	0	-	0	No	0.089214	No	0	No	1	0
chr15	72913673	72914142	2965	0	-	0	No	0	No	0	No	1	0
chr15	73582852	73583066	2966	0	+	0	No	0	No	0	No	0	0
chr15	76729011	76729269	2967	0	+	0	No	0	No	0	No	0	0
chr15	79693352	79693776	2969	0	-	0	No	0.126469	No	0	No	1	0
chr15	79699026	79699373	2971	2	-	0.00304699	No	0	No	0	No	2	0
chr15	80239309	80239723	2972	17	+	7.85268	Yes	0	No	0	No	2	0
chr15	82456944	82457343	2973	0	+	0	No	0	No	0	No	1	0
chr15	84184333	84184732	2975	0	+	0	No	0	No	0	No	0	0
chr15	84410111	84410510	2978	0	-	0	No	0	No	0	No	1	0
chr15	84488826	84489225	2980	0	-	0	No	0	No	0	No	0	0
chr15	85123386	85123767	2982	1	-	0.640076	No	0	No	0	No	1	0
chr15	85188966	85189365	2983	0	+	0	No	0	No	0	No	0	0
chr15	85281718	85282225	2985	16	+	2.69285	Yes	0	No	0	No	2	0
chr15	94303155	94303566	2987	0	-	0	No	0	No	0	No	0	0
chr15	94409009	94409510	2988	0	+	0	No	0	No	0	No	1	0
chr15	94876367	94876804	2989	9	+	5.9156	Yes	0	No	0	No	2	0
chr15	98488430	98488858	2990	13	+	1.04136	Yes	0.126469	No	0	No	2	1
chr15	99851479	99851922	2992	2	-	0.00544961	No	0.089214	No	0	No	1	0
chr15	100080969	100081376	2993	0	+	0	No	0	No	0	No	2	0
chr15	100223829	100224215	2994	2	-	0.00344505	No	0	No	0	No	1	1
chr15	100302705	100303120	2995	0	+	0	No	0	No	0	No	0	0
chr16	906243	906669	2997	0	+	0	No	0	No	0	No	1	0
chr16	5683353	5683744	2998	0	+	0	No	0	No	0	No	1	0
chr16	7787761	7788194	3000	0	+	0	No	0	No	0	No	1	0
chr16	17549890	17550311	3001	2	+	0.00287548	No	0	No	0	No	1	0
chr16	19368286	19368696	3004	0	-	0	No	0	No	0	No	0	0
chr16	20452112	20452521	3005	0	+	0	No	0	No	0	No	1	0
chr16	20575366	20575775	3008	0	-	0	No	0	No	0	No	1	0
chr16	23309451	23309844	3011	0	-	0	No	0	No	0	No	1	0
chr16	25311491	25311697	3012	0	-	0	No	0	No	0	No	2	1
chr16	25312769	25313178	3014	1	-	0.00040029	No	0	No	0	No	2	1
chr16	26542702	26543180	3015	0	-	0	No	0	No	0	No	1	0
chr16	26682913	26683350	3016	0	-	0	No	0	No	0	No	1	0
chr16	34394532	34394936	3018	0	-	0	No	0	No	0	No	0	0
chr16	35016889	35017295	3019	0	+	0	No	0	No	0	No	0	0
chr16	46701729	46702104	3021	58	+	24.8925	Yes	0	No	0	No	2	0
chr16	47859576	47859972	3023	3	+	0.554703	No	0	No	0	No	1	0
chr16	51774814	51775229	3025	46	-	17.0164	Yes	13.6955	Yes	0	No	2	0
chr16	58432918	58433163	3026	0	-	0	No	0	No	0	No	0	0
chr16	58433189	58433393	3027	0	-	0	No	0	No	0	No	1	0
chr16	60097086	60097529	3028	1	-	0.000481707	No	0	No	0	No	1	0
chr16	61041505	61041976	3029	0	+	0	No	0	No	0	No	1	0
chr16	62871297	62871676	3030	6	+	4.69796	Yes	0	No	0	No	2	0
chr16	63003730	63004174	3032	1	-	0.504356	No	0	No	0	No	2	0
chr16	63371489	63371857	3033	0	+	0	No	0	No	0	No	2	0
chr16	64229557	64229942	3035	0	+	0	No	0.126469	No	0.71229	No	1	0
chr16	65859447	65859926	3037	1	-	0.0657649	No	0	No	0	No	2	0
chr16	66051632	66052075	3038	0	-	0	No	0	No	0	No	1	0
chr16	71833897	71834319	3039	2	+	0.00144932	No	0	No	0	No	0	0
chr16	72517958	72518398	3040	21	+	7.24451	Yes	0.150059	No	0	No	2	0
chr16	73125394	73125877	3041	0	+	0	No	0	No	0	No	1	0
chr16	74114313	74114755	3042	0	+	0	No	0	No	0	No	0	0
chr16	74121793	74122161	3044	0	-	0	No	0	No	0	No	1	0
chr16	74133509	74133882	3045	0	+	0	No	0	No	0	No	0	0
chr16	86840706	86841241	3047	1	-	0.00379163	No	0	No	0	No	1	0
chr17	8647037	8647453	3050	0	+	0	No	0	No	0	No	1	0
chr17	12300710	12301144	3052	1	+	0.018287	No	0	No	0	No	1	0
chr17	13732614	13733000	3054	0	-	0	No	0	No	0	No	0	0
chr17	13955169	13955556	3055	2	+	0.0066499	No	0	No	0	No	1	0
chr17	14662827	14663311	3056	0	-	0	No	0	No	0	No	1	0
chr17	16368975	16369205	3057	0	+	0	No	0	No	0	No	2	0
chr17	16369485	16369776	3058	1	+	0.504733	No	0	No	0	No	0	0
chr17	29783337	29783713	3060	36	-	22.6471	Yes	0	No	0	No	2	0
chr17	31183586	31184014	3061	0	+	0	No	0	No	0	No	1	0
chr17	31188574	31189019	3062	1	+	0.000423295	No	0.126469	No	0	No	1	0
chr17	35453455	35453896	3063	5	+	1.46981	Yes	0	No	0	No	1	0
chr17	35456496	35456728	3064	20	+	3.28592	Yes	0	No	0	No	2	1
chr17	36111493	36111743	3066	6	+	1.16047	Yes	0.089214	No	0	No	2	1
chr17	36115864	36116246	3068	41	+	44.8636	Yes	10.0326	Yes	0	No	2	1
chr17	36122085	36122528	3070	0	-	0	No	0	No	0	No	2	0
chr17	40372996	40373425	3073	3	+	0.238967	No	0	No	0.079143	No	1	0
chr17	41877577	41877997	3074	6	+	0.00649629	Yes	0	No	0	No	1	1
[truncated: 418 more rows]

## Sheet: S2
Supplemental Table S2. List of MLT2A2 elements with activities in embryo, pineal gland, and amniotic membrane.
Chromosome	Start	End	ID	Expressed 4-cells or 8-cells	Strand	Mean exp in embryo (TPM)	Active in embryo	Mean exp in pineal gland (TPM)	Active in pineal gland	Mean exp in AM (TPM)	Active in AM	DUX4 motif	OTX2 motif
chr1	4167979	4168493	1	0	-	0	No	0	No	0	No	1	0
chr1	4179332	4179783	2	2	-	0.526103	No	0	No	0	No	1	0
chr1	4209630	4210162	3	0	-	0	No	0	No	0	No	2	0
chr1	4240183	4240730	4	2	+	0.474713	No	0.089214	No	0	No	1	0
chr1	4252503	4253050	5	0	+	0	No	0	No	0.079143	No	1	0
chr1	4492906	4493454	6	0	+	0	No	0	No	0	No	1	0
chr1	4761564	4762023	7	1	-	0.268683	No	0	No	0	No	1	0
chr1	4817227	4817770	8	0	+	0	No	0	No	0	No	0	0
chr1	4878400	4878912	9	1	+	0.0340832	No	0	No	0	No	1	0
chr1	9136868	9137072	14	1	-	0.346537	No	0	No	0	No	0	0
chr1	9509185	9509732	15	0	+	0	No	1.00323	No	0.079143	No	1	0
chr1	12532357	12532905	17	0	-	0	No	0	No	0	No	0	0
chr1	14794707	14795261	18	0	+	0	No	0.150059	No	0	No	0	0
chr1	19297940	19298445	19	1	+	0.0126826	No	0	No	0	No	0	0
chr1	24083292	24083611	21	0	+	0	No	0	No	0	No	0	0
chr1	28652520	28652921	24	0	-	0	No	0	No	0	No	1	0
chr1	30211637	30212149	25	0	+	0	No	0	No	0	No	1	0
chr1	36728231	36728601	26	1	+	0.00266614	No	0	No	0	No	1	0
chr1	38722897	38723453	27	0	-	0	No	0	No	0	No	1	0
chr1	41595588	41596007	29	1	+	0.132341	No	0	No	0	No	1	0
chr1	42869799	42870243	30	2	+	0.0151563	No	0	No	0.102318	No	1	0
chr1	46913528	46913981	31	0	-	0	No	0	No	0	No	3	0
chr1	48837301	48837663	32	0	+	0	No	0	No	0	No	1	0
chr1	49408401	49408951	34	1	+	0.161312	No	0	No	0	No	0	0
chr1	49926833	49927266	37	2	-	0.000939352	No	0	No	0	No	0	0
chr1	50727616	50728114	38	0	+	0	No	0	No	0	No	0	0
chr1	55491354	55491912	39	0	-	0	No	0	No	0	No	1	0
chr1	55871111	55871647	40	0	+	0	No	0	No	0	No	0	0
chr1	56458901	56459448	41	0	+	0	No	0	No	0	No	0	0
chr1	56774654	56775193	42	0	+	0	No	0	No	0	No	2	1
chr1	57522629	57523176	43	0	+	0	No	2.52667	No	0	No	1	0
chr1	58384507	58385052	44	0	-	0	No	0.126469	No	0	No	1	0
chr1	60086868	60087409	45	0	+	0	No	0	No	0	No	0	0
chr1	63027487	63028004	46	1	+	0.19294	No	0	No	0	No	1	0
chr1	63690387	63690837	50	10	-	6.11047	Yes	0	No	0	No	2	0
chr1	69034550	69034959	52	0	+	0	No	0	No	0	No	0	0
chr1	69976120	69976561	54	0	-	0	No	0	No	0	No	3	0
chr1	70559469	70559923	56	0	-	0	No	0	No	0	No	1	0
chr1	71344847	71345360	58	0	-	0	No	0	No	0	No	0	0
chr1	71739014	71739480	59	0	+	0	No	0	No	0	No	0	0
chr1	72370714	72371248	60	0	+	0	No	0	No	0	No	0	0
chr1	72540097	72540628	61	0	-	0	No	0	No	0	No	1	0
chr1	72805578	72806124	62	0	+	0	No	0	No	0	No	2	0
chr1	73553109	73553650	63	0	+	0	No	0	No	0	No	1	0
chr1	76651270	76651776	64	3	-	0.341659	No	0	No	0	No	2	0
chr1	79273514	79273855	66	0	-	0	No	0	No	0	No	1	0
chr1	79927924	79928384	67	1	+	0.0896644	No	0	No	0	No	0	0
chr1	79933739	79934188	68	0	+	0	No	0	No	0	No	1	1
chr1	80146119	80146511	70	0	-	0	No	0	No	0	No	1	0
chr1	80574448	80574680	71	0	-	0	No	0	No	0	No	1	0
chr1	80828031	80828492	73	0	+	0	No	0	No	0	No	0	0
chr1	83089491	83089909	74	0	-	0	No	0	No	0	No	0	0
chr1	88595832	88596225	75	0	+	0	No	0	No	0	No	1	0
chr1	88602327	88602753	77	4	+	0.0339921	No	0	No	0	No	0	0
chr1	89348651	89349193	80	0	+	0	No	0	No	0	No	1	1
chr1	89443236	89443684	81	0	-	0	No	0	No	0	No	0	1
chr1	90329091	90329622	82	0	+	0	No	0	No	0	No	0	0
chr1	91055334	91055780	84	0	-	0	No	0	No	0	No	2	0
chr1	91102089	91102537	85	4	-	0.288286	No	0	No	0	No	1	0
chr1	92497319	92497707	87	0	-	0	No	0	No	0	No	0	0
chr1	95380545	95381103	88	0	-	0	No	0	No	0	No	1	0
chr1	95709909	95710459	89	0	-	0	No	0	No	0	No	0	0
chr1	96065836	96066375	90	0	+	0	No	0	No	0	No	0	0
chr1	96247314	96247863	91	0	+	0	No	0	No	0	No	1	0
chr1	96618932	96619478	92	0	-	0	No	0	No	0	No	1	0
chr1	96668289	96668750	93	0	+	0	No	0	No	0	No	2	0
chr1	96986821	96987375	94	0	+	0	No	0	No	0	No	1	0
chr1	97408607	97409154	95	0	+	0	No	0.126469	No	0	No	0	0
chr1	100308086	100308645	96	0	-	0	No	0	No	0	No	0	0
chr1	101416725	101417252	97	0	-	0	No	0	No	0	No	0	0
chr1	101625110	101625553	98	0	+	0	No	0	No	0	No	2	0
chr1	101643842	101644392	99	0	+	0	No	0	No	0	No	0	0
chr1	102222798	102223351	100	0	+	0	No	0	No	0	No	0	0
chr1	102556945	102557284	101	0	-	0	No	0	No	0	No	2	0
chr1	104425759	104426276	102	0	+	0	No	0	No	0	No	1	0
chr1	104534382	104534933	103	1	+	0.0229819	No	0	No	0	No	1	0
chr1	104902220	104902663	104	0	+	0	No	0	No	0	No	1	0
chr1	105159925	105160432	106	0	-	0	No	0	No	0	No	1	0
chr1	105522167	105522571	108	1	-	0.000431266	No	0	No	0	No	1	0
chr1	105528260	105528669	110	0	-	0	No	0	No	0	No	1	0
chr1	105810830	105811221	113	0	-	0	No	0	No	0	No	1	0
chr1	106318128	106318672	114	0	-	0	No	0	No	0	No	0	0
chr1	106430572	106430976	115	0	+	0	No	0	No	0	No	1	0
chr1	106455731	106456278	116	3	-	1.90442	No	0	No	0	No	1	0
chr1	107857024	107857436	117	0	+	0	No	0	No	0	No	1	0
chr1	107987355	107987913	118	1	-	0.00189614	No	0	No	0	No	1	0
chr1	108018726	108019125	121	0	-	0	No	0	No	0	No	0	0
chr1	108023778	108024167	123	1	-	0.00146167	No	0	No	0	No	1	0
chr1	115005285	115005718	125	0	-	0	No	0	No	0	No	1	0
chr1	116843306	116843849	127	2	+	0.612679	No	0	No	0	No	1	1
chr1	119254916	119255460	128	0	+	0	No	0	No	0	No	0	0
chr1	120374888	120375447	129	0	+	0	No	0	No	0	No	1	0
chr1	120939192	120939548	131	0	-	0	No	0	No	0	No	1	0
chr1	144503550	144504109	132	0	-	0	No	0	No	0	No	1	0
chr1	145189501	145189862	133	1	+	0.00709631	No	0	No	0	No	1	0
chr1	146430087	146430642	135	0	+	0	No	0	No	0	No	1	0
chr1	148399316	148399672	137	4	-	0.714456	No	0	No	0	No	1	0
chr1	149142490	149143045	138	0	-	0	No	0	No	0	No	1	0
chr1	149633355	149633711	140	0	-	0	No	0	No	0	No	1	0
chr1	152028906	152029198	141	0	+	0	No	0	No	0	No	1	0
chr1	155589413	155589949	143	1	-	0.00312703	No	0	No	0	No	1	0
chr1	155711617	155712162	144	0	-	0	No	0	No	0	No	1	0
chr1	157456873	157457316	145	0	-	0	No	0	No	0	No	1	0
chr1	157462927	157463360	146	0	-	0	No	0	No	0	No	1	0
chr1	157886030	157886471	148	0	+	0	No	0	No	0	No	1	0
chr1	158602655	158603189	149	0	-	0	No	0	No	0	No	1	0
chr1	158697417	158697847	150	0	-	0	No	0	No	0	No	2	0
chr1	159662969	159663486	151	0	-	0	No	0	No	0	No	2	0
chr1	164488396	164488847	155	1	-	1.11817	No	0	No	0	No	1	0
chr1	169449395	169449943	156	0	-	0	No	0	No	0	No	1	0
chr1	173446473	173447011	157	0	+	0	No	0	No	0	No	1	0
chr1	175926290	175926841	158	0	-	0	No	0	No	0.181461	No	0	0
chr1	178199723	178200166	159	2	+	0.00145997	No	0	No	0.102318	No	0	0
chr1	178499299	178499699	160	0	+	0	No	0	No	0	No	2	0
chr1	181897522	181898077	162	0	-	0	No	1.01175	No	0	No	0	0
chr1	182723978	182724201	163	0	+	0	No	0	No	0	No	1	0
chr1	184221600	184222119	165	2	+	0.362433	No	0	No	0	No	1	0
chr1	185794297	185794814	166	1	-	0.0797471	No	0	No	0	No	1	0
chr1	186517620	186518058	167	0	-	0	No	0	No	0	No	1	0
chr1	187669137	187669685	168	0	-	0	No	0	No	0	No	1	0
chr1	187742418	187742977	169	0	+	0	No	0.150059	No	0	No	1	0
chr1	188729727	188730183	171	0	-	0	No	0	No	0	No	2	0
chr1	188905457	188906002	172	4	+	0.469964	No	0	No	0	No	1	0
chr1	189167442	189167990	173	0	+	0	No	0	No	0	No	1	0
chr1	189637294	189637735	176	1	+	0.110042	No	0	No	0	No	0	0
chr1	190210697	190211191	177	0	+	0	No	0.089214	No	0	No	0	0
chr1	190337297	190337826	179	0	+	0	No	0	No	0	No	2	1
chr1	190582367	190582887	180	0	-	0	No	0	No	0	No	1	0
chr1	190669149	190669588	181	2	-	0.642845	No	0	No	0	No	2	0
chr1	190675095	190675533	182	0	-	0	No	0	No	0	No	1	0
chr1	190756601	190757145	183	0	+	0	No	0	No	0	No	1	0
chr1	193375086	193375635	184	0	-	0	No	0	No	0	No	0	0
chr1	193383372	193383945	185	0	-	0	No	0	No	0	No	0	0
chr1	193492424	193492968	187	0	+	0	No	0.089214	No	0	No	1	0
chr1	194248877	194249322	188	0	+	0	No	0	No	0	No	1	0
chr1	194457505	194458042	189	0	+	0	No	0	No	0	No	1	0
chr1	194765826	194766280	190	0	-	0	No	0	No	0	No	0	0
chr1	195304055	195304605	191	1	+	0.00182546	No	0	No	0	No	1	0
chr1	195981506	195982055	192	0	+	0	No	0	No	0.079143	No	1	0
chr1	195998346	195998870	193	0	+	0	No	0	No	0	No	1	0
chr1	196001737	196002028	194	0	+	0	No	0	No	0	No	1	0
chr1	196002913	196003173	195	0	+	0	No	0.089214	No	0	No	0	0
chr1	198693910	198694467	200	0	-	0	No	0	No	0	No	1	0
chr1	199392037	199392469	201	0	-	0	No	0	No	0	No	1	0
chr1	206070950	206071492	202	0	-	0	No	0	No	0	No	1	0
chr1	211418410	211418862	203	3	+	1.08174	No	0	No	0	No	1	0
chr1	212232282	212232732	204	1	-	0.0803204	No	0	No	0	No	1	0
chr1	214084130	214084504	205	0	+	0	No	0	No	0	No	0	0
chr1	214687068	214687595	207	0	-	0	No	0	No	0	No	0	0
chr1	214834293	214834710	209	0	-	0	No	0	No	0	No	0	1
chr1	215318542	215319092	210	0	-	0	No	0	No	0	No	1	0
chr1	216452696	216453249	211	0	+	0	No	0	No	0	No	1	0
chr1	216874630	216875180	212	0	+	0	No	0	No	0	No	0	0
chr1	220829511	220830050	213	0	-	0	No	0	No	0	No	1	0
chr1	221226782	221227331	214	5	+	0.005412	Yes	0	No	0	No	0	0
chr1	221685215	221685724	215	0	-	0	No	0	No	0	No	1	0
chr1	221917852	221918399	216	0	+	0	No	0.328487	No	0	No	1	0
chr1	223644886	223645431	217	0	-	0	No	0	No	0	No	1	0
chr1	224860089	224860537	219	3	-	5.68227	No	0	No	0	No	1	1
chr1	225107921	225108471	220	0	+	0	No	0	No	0	No	0	0
chr1	225670655	225671188	221	0	+	0	No	0	No	0	No	0	0
chr1	226506475	226506883	223	0	-	0	No	0	No	0	No	1	0
chr1	227341882	227342412	224	0	-	0	No	0	No	0	No	0	0
chr1	229264239	229264776	225	1	+	0.105804	No	0	No	0	No	0	0
chr1	230239254	230239645	226	0	-	0	No	0	No	0	No	1	0
chr1	233412864	233413406	227	0	+	0	No	0	No	0	No	0	0
chr1	233771979	233772529	228	0	-	0	No	0	No	0	No	0	0
chr1	237199155	237199707	229	0	-	0	No	0	No	0	No	0	0
chr1	237494072	237494621	230	0	-	0	No	0	No	0	No	1	0
chr1	237653564	237654104	231	0	-	0	No	0	No	0	No	1	0
chr1	237923963	237924506	232	0	-	0	No	0	No	0	No	0	0
chr1	238399916	238400451	233	1	-	0.210062	No	0	No	0	No	1	0
chr1	238898874	238899426	234	0	-	0	No	0	No	0	No	0	0
chr1	239040042	239040583	235	0	+	0	No	0	No	0	No	1	0
chr1	239224709	239225116	236	3	+	0.00236563	No	0	No	0	No	1	0
chr1	240956988	240957544	239	0	+	0	No	0	No	0.102318	No	1	0
chr1	242563359	242563894	240	0	+	0	No	0	No	0	No	1	0
chr1	242698504	242699048	241	0	-	0	No	0	No	0	No	1	0
chr1	243289044	243289490	242	0	-	0	No	0.150059	No	0	No	0	0
chr1	243640855	243641273	243	0	+	0	No	0	No	0	No	0	0
chr1	246368566	246369020	246	0	+	0	No	0	No	0	No	1	0
chr1	247782381	247782782	247	0	-	0	No	0	No	0	No	0	0
chr1	247789018	247789443	249	0	-	0	No	0	No	0	No	2	0
chr1	248331418	248331796	250	0	-	0	No	0	No	0	No	1	0
chr1	248756478	248756884	251	0	-	0	No	0	No	0	No	0	0
chr1	248756870	248757112	252	0	-	0	No	0	No	0	No	1	0
chr2	473863	474242	253	0	+	0	No	0	No	0	No	2	0
chr2	1057326	1057753	256	0	-	0	No	0	No	0	No	0	0
chr2	1147219	1147666	257	1	+	0.185011	No	0	No	0	No	1	0
chr2	1284962	1285363	258	0	-	0	No	0	No	0	No	1	0
chr2	2382555	2383101	260	0	+	0	No	0	No	0	No	0	0
chr2	2549000	2549549	261	0	-	0	No	0	No	0	No	0	0
chr2	3047431	3047975	262	0	+	0	No	0.150059	No	0	No	0	0
chr2	3474159	3474517	263	0	-	0	No	0	No	0	No	0	0
chr2	3882627	3883070	264	0	+	0	No	0	No	0	No	1	0
chr2	4056767	4057205	265	0	+	0	No	0	No	0	No	1	0
chr2	4062808	4063247	266	0	+	0	No	0.126469	No	0	No	2	0
chr2	4168245	4168712	268	0	+	0	No	0	No	0.079143	No	0	0
chr2	4177134	4177661	269	0	+	0	No	0	No	0	No	1	0
chr2	4260730	4261131	271	0	-	0	No	0	No	0	No	0	0
chr2	4353103	4353590	272	0	+	0	No	0	No	0	No	1	0
chr2	4472865	4473425	274	0	-	0	No	0	No	0	No	0	0
chr2	4481902	4482330	275	0	+	0	No	0	No	0	No	1	0
chr2	4692390	4692762	277	0	+	0	No	0	No	0	No	0	0
chr2	4949855	4950304	278	0	-	0	No	0	No	0	No	1	0
chr2	5343249	5343692	279	0	+	0	No	0	No	0	No	0	0
chr2	5644240	5644799	280	0	+	0	No	0	No	0	No	1	0
chr2	6673922	6674318	283	0	-	0	No	0	No	0	No	0	0
chr2	6761861	6762486	284	0	+	0	No	0.089214	No	0	No	0	0
chr2	6820403	6820793	285	0	-	0	No	0	No	0	No	1	0
chr2	6995363	6995878	286	0	-	0	No	0	No	0	No	1	0
chr2	7296145	7296693	287	0	-	0	No	0	No	0.120817	No	2	0
chr2	7657546	7658089	288	0	+	0	No	0	No	0	No	1	0
chr2	7987176	7987630	289	0	+	0	No	0	No	0	No	0	0
chr2	8047346	8047892	290	0	+	0	No	0	No	0	No	1	0
chr2	8503750	8504294	291	0	+	0	No	0	No	0	No	1	0
chr2	11470273	11470813	292	0	-	0	No	0	No	0	No	0	0
chr2	12385860	12386372	293	0	+	0	No	0	No	0	No	0	0
chr2	12406396	12406911	294	0	-	0	No	0.126469	No	0	No	1	0
chr2	14336235	14336685	295	0	+	0	No	0.089214	No	0	No	1	0
chr2	14682581	14683076	298	0	-	0	No	0	No	0	No	1	0
chr2	15302656	15303207	300	0	+	0	No	0	No	0	No	1	0
chr2	16052491	16053027	301	0	-	0	No	0	No	0	No	1	0
chr2	16947461	16947942	302	2	+	0.184206	No	21.5119	Yes	0	No	0	0
chr2	16981448	16981996	303	0	+	0	No	14.9828	Yes	0	No	0	0
chr2	17069813	17070342	304	0	-	0	No	0	No	0	No	0	0
chr2	17089381	17089902	305	0	-	0	No	0	No	0	No	0	0
chr2	18154374	18154923	306	0	-	0	No	0.089214	No	0	No	1	0
chr2	18266586	18267125	307	0	-	0	No	0	No	0	No	1	0
chr2	18638219	18638735	308	0	+	0	No	0	No	0	No	0	0
chr2	18724466	18724686	309	0	+	0	No	0	No	0	No	0	0
chr2	19096219	19096780	311	0	+	0	No	0	No	0	No	1	0
chr2	19171194	19171566	313	0	-	0	No	0	No	0	No	2	0
chr2	19595384	19595933	314	0	+	0	No	0	No	0	No	1	0
chr2	22089418	22089891	315	0	+	0	No	0	No	0	No	0	0
chr2	22099890	22100373	316	0	-	0	No	0	No	0	No	1	0
chr2	22170022	22170576	317	0	+	0	No	0	No	0	No	1	0
chr2	23090028	23090564	318	0	+	0	No	0	No	0	No	1	0
chr2	29101325	29101706	321	0	-	0	No	0	No	0	No	1	1
chr2	30112624	30113166	323	0	+	0	No	0	No	0	No	0	0
chr2	31091766	31092326	324	0	+	0	No	0	No	0	No	1	0
chr2	31774915	31775463	325	0	+	0	No	0	No	0	No	1	0
chr2	34097473	34098015	327	0	-	0	No	0	No	0	No	0	0
chr2	35202811	35203358	328	0	-	0	No	0	No	0	No	1	1
chr2	35425058	35425596	329	0	-	0	No	0	No	0	No	1	0
chr2	35669155	35669706	330	1	-	0.351538	No	0	No	0	No	1	0
chr2	37664192	37664560	332	0	+	0	No	0	No	0.120817	No	0	0
chr2	37913116	37913665	334	0	+	0	No	0	No	0	No	1	0
chr2	38626632	38627151	335	0	-	0	No	0	No	0	No	1	0
chr2	39958234	39958478	336	0	-	0	No	0	No	0	No	1	0
chr2	39965014	39965503	338	0	-	0	No	0	No	0	No	1	0
chr2	39980219	39980685	339	0	-	0	No	0	No	0	No	1	0
chr2	41627844	41628399	340	0	+	0	No	0	No	0	No	1	0
chr2	42202415	42202833	341	0	-	0	No	0	No	0	No	2	0
chr2	43558367	43558801	343	2	+	0.566553	No	0.126469	No	0	No	2	0
chr2	45841150	45841698	344	0	-	0	No	0	No	0	No	0	0
chr2	49005788	49006237	345	0	+	0	No	0	No	0	No	0	0
chr2	49581577	49582017	346	0	+	0	No	0	No	0	No	1	0
chr2	50761608	50762122	347	0	+	0	No	0	No	0	No	0	0
chr2	51946368	51946923	349	0	-	0	No	0.089214	No	0	No	1	0
chr2	52364005	52364446	350	1	+	0.00117189	No	0	No	0	No	1	0
chr2	52649481	52649925	351	1	-	0.00050688	No	0	No	0	No	1	0
chr2	52655683	52656060	353	0	-	0	No	0	No	0	No	1	0
chr2	55937192	55937741	354	0	-	0	No	0.089214	No	0	No	1	0
chr2	56616913	56617326	355	0	+	0	No	0	No	0	No	1	1
chr2	56623549	56623931	356	0	+	0	No	0	No	0	No	0	0
chr2	57736500	57737008	358	0	-	0	No	0.126469	No	0	No	1	0
chr2	58066842	58067408	359	6	+	2.41905	Yes	0	No	0.079143	No	1	0
chr2	58073683	58074076	361	0	-	0	No	0	No	0	No	2	0
chr2	58863839	58864387	362	1	-	0.00040029	No	0	No	0	No	0	0
chr2	59100604	59100952	363	0	-	0	No	0	No	0	No	0	0
chr2	59101247	59101456	364	0	-	0	No	0	No	0	No	0	0
chr2	63298304	63298721	366	0	+	0	No	0	No	0	No	1	0
chr2	65800175	65800682	367	0	+	0	No	0	No	0	No	0	0
chr2	67013421	67013822	369	0	-	0	No	0	No	0	No	0	0
chr2	67807432	67807724	370	0	+	0	No	0	No	0	No	1	0
chr2	72874820	72875363	371	0	-	0	No	0	No	0	No	0	0
chr2	75227997	75228519	372	0	-	0	No	0	No	0	No	0	0
chr2	75269522	75270039	373	0	-	0	No	0	No	0	No	2	0
chr2	75392316	75392746	374	1	-	0.0518	No	0	No	0	No	2	0
chr2	75396731	75397169	375	0	-	0	No	0	No	0	No	0	0
chr2	76104810	76105249	376	0	+	0	No	0	No	0	No	0	0
chr2	76363706	76364242	378	0	+	0	No	0	No	0	No	0	0
chr2	76531281	76531655	379	0	+	0	No	0	No	0	No	1	0
chr2	76594793	76595321	380	0	+	0	No	0	No	0	No	1	0
chr2	77029179	77029626	381	0	-	0	No	0	No	0	No	0	0
chr2	77819468	77820027	382	0	+	0	No	0.089214	No	0	No	1	0
chr2	77956485	77957027	383	0	-	0	No	0	No	0	No	0	0
chr2	78076439	78076992	384	0	-	0	No	0	No	0	No	0	0
chr2	79050744	79051293	385	0	+	0	No	0	No	0	No	0	0
chr2	80175593	80176133	386	0	-	0	No	0	No	0	No	0	1
chr2	80181988	80182524	387	0	-	0	No	0	No	0	No	1	0
chr2	80668226	80668773	388	0	+	0	No	0	No	0	No	1	0
chr2	81066879	81067419	389	1	-	0.00269532	No	0	No	0	No	0	0
chr2	82383050	82383592	390	0	-	0	No	0	No	0	No	0	0
chr2	82898324	82898533	391	0	-	0	No	0	No	0	No	2	0
chr2	82981830	82982230	393	4	-	0.759585	No	0	No	0	No	1	0
chr2	83159687	83160152	394	0	-	0	No	0	No	0	No	1	0
chr2	83762548	83763005	395	0	+	0	No	0	No	0	No	1	0
chr2	84208659	84209199	396	1	+	0.491156	No	0	No	0	No	1	0
chr2	88407133	88407558	397	3	+	2.17397	No	0	No	0	No	2	0
chr2	89149076	89149626	398	0	+	0	No	0	No	0	No	1	0
chr2	90032304	90032852	399	0	-	0	No	0	No	0	No	1	0
chr2	91910522	91911084	400	0	-	0	No	0	No	0	No	2	0
chr2	100513453	100513962	401	1	-	0.0620809	No	0	No	0	No	1	0
chr2	103137754	103138268	402	0	+	0	No	0	No	0	No	0	0
chr2	103534617	103535057	403	0	+	0	No	0	No	0	No	0	0
chr2	103722244	103722784	405	0	+	0	No	0.150059	No	0	No	1	0
chr2	104171565	104172069	406	0	+	0	No	0	No	0	No	1	0
chr2	106936251	106936799	408	0	-	0	No	0	No	0	No	1	0
chr2	107260521	107260968	409	0	-	0	No	0	No	0	No	0	0
chr2	107584052	107584586	410	0	-	0	No	0	No	0	No	1	0
chr2	112863967	112864465	412	14	-	7.95435	Yes	0	No	0	No	3	0
chr2	114311238	114311794	413	0	+	0	No	0	No	0	No	0	0
chr2	115238791	115239239	414	1	-	0.285067	No	0	No	0	No	1	0
chr2	117163272	117163724	415	0	-	0	No	0	No	0	No	1	0
chr2	117879471	117880022	416	0	+	0	No	0	No	0	No	1	0
chr2	119037217	119037651	417	0	+	0	No	0	No	0	No	0	0
chr2	122715928	122716478	418	0	-	0	No	0	No	0	No	1	0
chr2	123835829	123836380	420	0	-	0	No	0.150059	No	0	No	1	0
chr2	123976808	123977358	421	0	-	0	No	0	No	0	No	0	0
chr2	125252572	125253078	422	0	-	0	No	0	No	0	No	1	0
chr2	125293551	125294098	423	1	+	0.0714676	No	0	No	0	No	2	0
chr2	125585790	125586071	424	0	-	0	No	0	No	0	No	0	0
chr2	125660437	125661002	425	0	+	0	No	0	No	0	No	0	0
chr2	126070819	126071339	426	0	+	0	No	0	No	0	No	0	0
chr2	126079669	126080209	428	0	+	0	No	0	No	0	No	0	0
chr2	126300638	126301143	429	0	-	0	No	0	No	0	No	1	0
chr2	128888310	128888753	430	0	+	0	No	0	No	0	No	1	0
chr2	128997903	128998408	431	0	+	0	No	0	No	0	No	1	0
chr2	129985821	129986352	432	0	+	0	No	0	No	0	No	1	0
chr2	131359779	131360309	434	0	-	0	No	0	No	0	No	0	0
chr2	131869430	131869879	435	0	+	0	No	0	No	0	No	1	0
chr2	131920990	131921535	436	0	-	0	No	0	No	0	No	1	0
chr2	132591287	132591641	439	0	+	0	No	0	No	0	No	0	0
chr2	133713799	133714349	440	0	+	0	No	0	No	0	No	1	0
chr2	134488134	134488726	441	0	+	0	No	0.089214	No	0	No	0	0
chr2	136692339	136692867	442	0	-	0	No	0.126469	No	0	No	1	0
chr2	137514141	137514586	443	0	+	0	No	0.126469	No	0	No	1	0
chr2	137719908	137720361	444	0	+	0	No	0	No	0	No	1	0
chr2	137753055	137753597	446	0	+	0	No	0	No	0	No	0	0
chr2	138803768	138804293	447	0	-	0	No	0	No	0	No	0	0
chr2	139238844	139239252	448	3	+	0.321716	No	0	No	0	No	1	0
chr2	139867614	139868163	449	1	+	0.0425931	No	0	No	1.30676	No	1	0
chr2	140627186	140627714	450	0	+	0	No	0	No	0	No	1	0
chr2	140839299	140839827	451	0	+	0	No	0	No	0	No	0	0
chr2	140897456	140898005	452	0	+	0	No	0	No	0	No	0	0
chr2	141816179	141816724	453	0	+	0	No	0	No	0	No	1	0
chr2	142446021	142446291	454	0	-	0	No	0	No	0	No	0	0
chr2	142446413	142446667	455	1	-	0.24668	No	0	No	0	No	1	0
chr2	142741040	142741573	456	0	-	0	No	0	No	0	No	0	0
chr2	145093039	145093349	457	0	-	0	No	0	No	0	No	0	0
chr2	145469477	145470032	462	1	+	0.00210205	No	0	No	0	No	0	0
chr2	146116879	146117407	464	0	-	0	No	0	No	0	No	0	0
chr2	146362178	146362726	465	1	+	0.0572893	No	0	No	0	No	2	0
chr2	146774661	146775200	466	1	+	0.000177743	No	0	No	0	No	0	0
chr2	146780812	146781362	467	0	+	0	No	0	No	0	No	0	0
chr2	147518674	147519125	468	1	+	0.288066	No	0	No	0	No	2	0
chr2	148377068	148377464	470	0	-	0	No	0	No	0	No	1	0
chr2	148852160	148852598	471	1	+	1.35419	No	0	No	0	No	1	0
chr2	152357866	152358367	472	1	+	0.0763284	No	0	No	0	No	1	0
chr2	152763220	152763754	474	0	-	0	No	0	No	0	No	0	0
chr2	153408755	153409287	475	1	+	0.152772	No	33.4124	Yes	0	No	0	0
chr2	153695967	153696513	476	0	-	0	No	0	No	0	No	1	0
chr2	153852846	153853384	477	0	-	0	No	0	No	0	No	1	1
chr2	153952611	153953160	478	0	-	0	No	0.126469	No	0	No	1	0
chr2	154131668	154132222	479	0	-	0	No	0	No	0	No	1	0
chr2	154350141	154350691	480	0	+	0	No	0.215683	No	0.19996	No	1	0
chr2	155148292	155148672	482	0	-	0	No	0	No	0	No	0	0
chr2	159905846	159906376	483	0	+	0	No	0	No	0	No	0	0
chr2	160572755	160573300	484	2	+	0.145776	No	0	No	0	No	1	0
chr2	160930505	160930962	485	0	+	0	No	0	No	0	No	1	0
chr2	161061208	161061763	486	0	+	0	No	0	No	0	No	1	0
chr2	162994337	162994775	487	0	-	0	No	0	No	0	No	0	0
chr2	163577550	163578052	488	6	+	2.05604	Yes	0	No	0	No	1	0
chr2	165926572	165926969	492	0	+	0	No	0	No	0	No	0	0
chr2	168304082	168304632	494	0	+	0	No	0	No	0	No	1	0
chr2	169860708	169861263	495	0	-	0	No	0	No	0	No	0	0
chr2	170194645	170195134	496	0	-	0	No	0	No	0	No	0	0
chr2	176511477	176511923	498	0	-	0	No	0	No	0	No	1	0
chr2	177832166	177832554	499	0	+	0	No	0	No	0	No	2	0
chr2	181407750	181408129	501	0	-	0	No	0	No	0	No	1	0
chr2	182389637	182390182	502	0	+	0	No	0	No	0	No	0	0
chr2	183205662	183206196	503	1	+	0.00896644	No	0	No	0	No	0	0
chr2	183251056	183251446	505	0	-	0	No	0	No	0	No	0	0
chr2	183484844	183485385	506	1	+	0.443177	No	0	No	0	No	1	0
chr2	184183522	184184070	507	0	+	0	No	0	No	0	No	1	0
chr2	184386395	184386815	508	0	+	0	No	0	No	0	No	1	0
chr2	184562311	184562855	510	0	+	0	No	0	No	0	No	1	0
chr2	184573966	184574450	511	0	-	0	No	0	No	0	No	1	0
chr2	185565469	185566034	512	0	+	0	No	0	No	0	No	1	0
chr2	186210838	186211370	513	0	-	0	No	0.365742	No	0	No	1	0
chr2	186409558	186410007	514	0	-	0	No	0.126469	No	0	No	1	0
chr2	186414954	186415438	515	0	-	0	No	0	No	0	No	1	0
chr2	187200358	187200900	516	0	-	0	No	0.089214	No	0	No	1	0
chr2	187205314	187205857	517	5	-	1.30641	Yes	0	No	0	No	2	0
chr2	187285442	187285839	519	0	-	0	No	0	No	0	No	0	0
chr2	188044247	188044554	520	0	+	0	No	0	No	0	No	0	0
chr2	188044887	188045131	521	0	+	0	No	0	No	0	No	0	0
chr2	188547325	188547763	522	0	-	0	No	0	No	0	No	0	0
chr2	190309849	190310407	523	0	+	0	No	0	No	0	No	1	0
chr2	192460211	192460689	524	0	-	0	No	0.426587	No	0.079143	No	0	0
chr2	192462887	192463407	525	0	+	0	No	0	No	0	No	1	0
chr2	192476319	192476862	526	0	-	0	No	0	No	0	No	0	0
chr2	192488400	192488789	527	0	-	0	No	0	No	0	No	1	0
chr2	192491697	192492082	528	0	+	0	No	0	No	0	No	1	0
chr2	193204894	193205339	530	0	+	0	No	0	No	0	No	0	0
chr2	193729364	193729911	531	0	+	0	No	0.089214	No	0	No	1	0
chr2	194336828	194337360	532	1	+	0.000961587	No	0	No	0	No	0	0
chr2	195110952	195111211	533	0	+	0	No	0	No	0	No	0	0
chr2	195277788	195278333	534	0	-	0	No	0	No	0	No	1	0
chr2	195742855	195743405	535	0	+	0	No	0	No	0	No	1	0
chr2	195846553	195846949	536	0	+	0	No	0	No	0	No	1	0
chr2	198540785	198541321	538	0	+	0	No	0	No	0	No	1	0
chr2	199544092	199544608	539	81	-	63.4853	Yes	0	No	0	No	1	0
chr2	201164315	201164753	540	0	-	0	No	0	No	0	No	0	0
chr2	202354491	202355031	541	0	-	0	No	0	No	0	No	1	0
chr2	202650472	202651018	542	1	-	0.268324	No	0	No	0	No	0	0
chr2	202902333	202902816	543	0	+	0	No	0	No	0	No	1	0
chr2	203976563	203977103	545	0	+	0	No	0	No	0	No	1	1
chr2	203978329	203978779	546	0	-	0	No	0	No	0	No	1	0
chr2	205833203	205833641	547	0	+	0	No	0	No	0	No	2	0
chr2	207696750	207697282	548	1	-	0.0248204	No	0	No	0.102318	No	1	0
chr2	208561140	208561696	549	1	-	0.194598	No	0	No	0	No	1	0
chr2	208701368	208701914	550	0	-	0	No	0	No	0	No	1	0
chr2	209099222	209099761	551	1	-	0.000177743	No	0	No	0	No	1	0
chr2	211133754	211134162	552	0	+	0	No	0	No	0	No	1	0
chr2	211140428	211140819	554	0	+	0	No	0	No	0	No	1	0
chr2	211769456	211770016	557	0	-	0	No	0	No	0	No	1	0
chr2	212051956	212052506	558	0	+	0	No	0	No	0	No	0	0
chr2	213465838	213466296	559	0	+	0	No	0.126469	No	0	No	1	0
chr2	213552628	213553179	560	0	+	0	No	0.150059	No	0	No	0	0
chr2	219833472	219833929	561	0	-	0	No	0	No	0	No	1	0
chr2	220496928	220497473	562	0	-	0	No	0	No	0	No	2	0
chr2	220594022	220594579	563	0	+	0	No	0	No	0	No	0	0
chr2	220605038	220605587	564	0	-	0	No	0	No	0	No	1	0
chr2	220860229	220860765	565	0	+	0	No	0	No	0	No	1	0
chr2	221010169	221010690	566	0	+	0	No	0.239273	No	0	No	1	0
chr2	223295923	223296472	567	0	+	0	No	0	No	0	No	0	0
chr2	223302392	223302936	568	0	+	0	No	0	No	0	No	0	0
chr2	223870118	223870646	569	1	+	0.207892	No	0	No	0	No	0	0
chr2	224377194	224377746	570	0	+	0	No	0	No	0	No	1	0
chr2	224777238	224777787	571	0	+	0	No	0	No	0	No	1	0
chr2	225168658	225169107	572	0	+	0	No	0	No	0	No	2	0
chr2	225524017	225524558	573	0	-	0	No	0	No	0	No	0	0
chr2	225761668	225762130	574	0	+	0	No	0	No	0	No	0	0
chr2	225788924	225789127	575	0	-	0	No	0	No	0	No	1	0
chr2	225835922	225836468	576	3	-	0.670089	No	0	No	0	No	2	0
chr2	226104444	226104853	577	3	+	0.108297	No	0	No	0	No	1	0
chr2	226122377	226122858	579	0	-	0	No	0	No	0	No	2	0
chr2	226241000	226241509	581	0	+	0	No	0.089214	No	0	No	0	0
chr2	226368169	226368570	582	0	-	0	No	0	No	0	No	1	0
chr2	228618998	228619530	583	0	+	0	No	0	No	0	No	0	0
chr2	228846979	228847525	584	0	+	0	No	0	No	0	No	0	0
chr2	230104840	230105333	585	0	-	0	No	0	No	0	No	0	0
chr2	233874403	233874874	586	0	+	0	No	0	No	0	No	1	0
chr2	235600469	235600901	590	0	-	0	No	0	No	0	No	0	0
chr2	236779448	236780019	591	0	-	0	No	0	No	0	No	2	0
chr2	237319369	237319902	592	0	+	0	No	0	No	0	No	0	0
chr2	238836657	238837164	593	0	-	0	No	0	No	0	No	1	0
chr3	620504	620926	594	0	+	0	No	0.150059	No	0	No	2	0
chr3	2641976	2642477	595	0	-	0	No	0	No	0	No	0	0
chr3	3347140	3347696	596	0	+	0	No	0	No	0	No	0	0
chr3	3782417	3783018	597	1	-	0.00704778	No	0	No	0	No	0	0
chr3	4210714	4211121	598	0	+	0	No	0	No	0	No	0	0
chr3	5273603	5274053	600	7	+	5.46573	Yes	0	No	0	No	1	0
chr3	5640594	5641064	601	0	+	0	No	0	No	0	No	2	0
chr3	5957212	5957725	602	0	+	0	No	0	No	0	No	1	0
chr3	5996130	5996678	603	3	-	0.946094	No	0	No	0	No	1	0
chr3	6256742	6257177	604	0	+	0	No	0	No	0	No	3	0
chr3	7770521	7771069	605	0	-	0	No	0	No	0	No	1	0
chr3	7859157	7859604	606	0	+	0	No	0	No	0	No	1	0
chr3	8356168	8356656	607	0	+	0	No	0	No	0	No	2	0
chr3	8586787	8587211	608	0	-	0	No	0.126469	No	0	No	0	0
chr3	11104446	11104845	609	0	+	0	No	0	No	0	No	1	0
chr3	13921493	13922037	610	0	+	0	No	0	No	0	No	1	0
chr3	14981627	14982094	611	0	-	0	No	0	No	0	No	0	0
chr3	16559759	16560308	612	0	+	0	No	0	No	0	No	1	0
chr3	17400556	17401100	613	0	+	0	No	0	No	0	No	0	0
chr3	18182989	18183406	614	0	+	0	No	0	No	0	No	0	0
chr3	18581143	18581593	615	1	+	0.000306425	No	0	No	0	No	1	0
chr3	18822673	18823153	616	0	-	0	No	0	No	0	No	2	0
chr3	19129030	19129580	617	0	-	0	No	0	No	0	No	0	0
chr3	21010169	21010678	618	0	+	0	No	0	No	0	No	2	0
chr3	21376857	21377404	619	0	-	0	No	0	No	0	No	1	0
chr3	21636414	21636805	621	0	-	0	No	0	No	0	No	2	0
chr3	22228599	22229146	623	1	+	0.23679	No	0	No	0	No	1	0
chr3	22516229	22516638	624	2	+	0.00220256	No	0	No	0	No	2	0
chr3	22517544	22517881	625	0	+	0	No	0	No	0	No	2	0
chr3	23064169	23064714	627	0	+	0	No	0.126469	No	0	No	0	0
chr3	23681256	23681810	628	1	+	0.0773449	No	0	No	0	No	1	0
chr3	26337068	26337612	630	0	+	0	No	0	No	0	No	0	0
chr3	27016153	27016586	631	0	+	0	No	0	No	0	No	1	0
chr3	27033529	27033964	632	2	+	1.13845	No	0	No	0	No	2	1
chr3	27704672	27704988	633	0	+	0	No	0	No	0	No	0	0
chr3	28701658	28702193	634	0	-	0	No	0	No	0	No	1	0
chr3	32207767	32208295	635	0	-	0	No	0	No	0	No	1	0
chr3	34712524	34713042	636	0	+	0	No	0	No	0	No	0	0
chr3	35619125	35619659	637	3	+	1.90811	No	0	No	0	No	1	0
chr3	36133482	36134040	638	0	-	0	No	0	No	0	No	2	0
chr3	36298533	36298965	639	3	-	3.58835	No	0	No	0	No	1	0
chr3	41010256	41010646	641	0	-	0	No	0	No	0	No	1	0
chr3	46122798	46123253	642	0	+	0	No	0	No	0	No	0	0
chr3	50990553	50990997	643	0	-	0	No	0	No	0	No	1	0
chr3	54542359	54542860	645	1	-	0.00317064	No	0	No	0	No	0	0
chr3	56049421	56049818	646	0	+	0	No	0	No	0	No	0	0
chr3	59471596	59472120	648	0	-	0	No	0	No	0	No	1	0
chr3	59565862	59566403	649	0	+	0	No	0	No	0	No	0	0
chr3	62705404	62705857	652	0	+	0	No	0	No	0	No	0	0
chr3	62798130	62798628	653	0	+	0	No	0	No	0	No	1	0
chr3	62901835	62902373	654	0	+	0	No	0	No	0	No	0	0
chr3	62922079	62922458	655	0	+	0	No	0	No	0	No	1	1
chr3	64499118	64499668	657	0	-	0	No	0	No	0	No	1	0
chr3	66852220	66852775	658	0	-	0	No	0	No	0	No	0	0
chr3	67282525	67283084	659	0	-	0	No	0	No	0	No	0	0
chr3	67914844	67915387	660	0	-	0	No	0	No	0	No	1	1
chr3	68439444	68439831	662	0	-	0	No	0	No	0	No	2	0
chr3	68488066	68488505	663	0	-	0	No	0	No	0	No	0	0
chr3	68745851	68746386	664	0	+	0	No	0	No	0	No	1	0
chr3	70669523	70670056	665	4	-	0.467606	No	0	No	0	No	1	0
chr3	74153325	74153771	666	0	-	0	No	0	No	0	No	1	0
chr3	74546322	74546872	667	1	+	0.92908	No	0	No	0	No	2	0
chr3	76050016	76050565	668	0	+	0	No	0	No	0	No	1	0
chr3	76133413	76133968	669	1	-	0.221224	No	0	No	0	No	0	0
chr3	76629297	76629742	670	0	-	0	No	0	No	0	No	1	0
chr3	77675042	77675409	671	0	+	0	No	0.089214	No	0	No	1	0
chr3	77819790	77820293	672	0	+	0	No	0	No	0	No	1	0
chr3	79642916	79643462	673	0	+	0	No	0	No	0	No	1	0
chr3	80375607	80376144	674	0	-	0	No	0	No	0	No	1	1
chr3	80392663	80393178	675	1	-	1.92926	No	0	No	0	No	0	0
chr3	80415351	80415912	676	0	-	0	No	0	No	0	No	1	0
chr3	81640136	81640675	677	0	+	0	No	0	No	0	No	1	0
chr3	82758293	82758864	680	0	+	0	No	0	No	0	No	0	0
chr3	82762784	82763332	681	0	+	0	No	0	No	0	No	0	0
chr3	83086466	83086994	683	0	+	0	No	0	No	0	No	1	0
chr3	83549537	83549988	685	0	-	0	No	0	No	0	No	1	0
chr3	84567856	84568405	688	0	-	0	No	0	No	0	No	0	0
chr3	86200724	86201176	689	0	+	0	No	0	No	0	No	1	0
chr3	86444972	86445365	690	0	+	0	No	0	No	0	No	1	0
chr3	87131831	87132376	694	0	-	0	No	0	No	0	No	1	0
chr3	88468645	88469156	695	0	+	0	No	0	No	0	No	1	0
chr3	88787410	88787627	696	0	-	0	No	0	No	0	No	0	0
chr3	89559536	89560048	697	0	+	0	No	0	No	0.102318	No	2	0
chr3	89564822	89565319	698	0	+	0	No	0	No	0	No	1	0
chr3	94886366	94886834	701	0	+	0	No	0	No	0	No	0	0
chr3	94889242	94889689	702	0	+	0	No	0	No	0	No	1	0
chr3	96305801	96306238	704	0	-	0	No	0	No	0	No	2	0
chr3	96511833	96512278	705	0	+	0	No	0	No	0	No	0	0
chr3	96580645	96581189	706	0	+	0	No	0	No	0	No	1	0
chr3	98509623	98510128	707	0	-	0	No	0	No	0	No	2	0
chr3	98818500	98819014	708	1	+	0.746382	No	0	No	0	No	0	0
chr3	99022001	99022543	709	0	-	0	No	0	No	0	No	1	0
chr3	99068498	99069008	710	1	+	0.508973	No	0	No	0	No	1	0
chr3	99539782	99540201	711	0	+	0	No	0	No	0	No	1	0
chr3	99653834	99654383	712	0	-	0	No	0	No	0	No	0	0
chr3	100237712	100238103	713	0	+	0	No	0	No	0	No	0	0
chr3	100242960	100243393	714	2	+	1.10276	No	0	No	0	No	1	1
chr3	100892892	100893439	715	0	+	0	No	0	No	0	No	1	1
chr3	102649574	102650020	716	1	-	0.483649	No	0	No	0	No	1	0
chr3	102861328	102861710	718	0	-	0	No	0	No	0	No	2	0
chr3	103284079	103284484	719	0	-	0	No	0	No	0	No	2	0
chr3	103345539	103345942	722	0	-	0	No	0	No	0	No	1	0
chr3	103346462	103346724	724	0	-	0	No	0	No	0	No	1	0
chr3	103691691	103692148	725	0	+	0	No	0	No	0	No	1	0
chr3	104362467	104363017	726	0	-	0	No	0	No	0.079143	No	1	0
chr3	104479447	104479893	727	0	-	0	No	0	No	0	No	2	0
chr3	104564839	104565262	728	0	-	0	No	0	No	0	No	1	0
chr3	104725852	104726325	729	0	-	0	No	0	No	0	No	1	0
chr3	105112424	105112966	730	0	-	0	No	0	No	0	No	0	0
chr3	106177768	106178317	731	0	-	0	No	0	No	0	No	1	0
chr3	106773131	106773582	732	2	+	0.00837233	No	0	No	0	No	1	0
chr3	108741891	108742409	733	0	-	0	No	0.126469	No	0	No	0	0
chr3	109256441	109256918	735	0	-	0	No	0	No	0	No	0	0
chr3	109774514	109774935	736	4	-	1.26391	No	0	No	0	No	1	0
chr3	109780619	109780949	738	0	-	0	No	0	No	0	No	0	0
chr3	109809442	109809689	739	0	-	0	No	0	No	0	No	0	0
chr3	109809732	109809936	740	0	-	0	No	0	No	0	No	0	0
chr3	110150067	110150430	741	0	+	0	No	0	No	0	No	1	0
chr3	111302433	111302964	742	0	-	0	No	0	No	0	No	0	0
chr3	112376302	112376841	743	0	-	0	No	0	No	0	No	2	0
chr3	115181074	115181525	744	0	+	0	No	0	No	0	No	1	0
chr3	115951454	115951897	746	0	+	0	No	0	No	0	No	2	0
chr3	116210181	116210722	747	0	+	0	No	0	No	0	No	0	0
chr3	118153977	118154494	748	0	-	0	No	0	No	0.120817	No	2	1
chr3	118770931	118771443	749	0	-	0	No	0	No	0	No	0	0
chr3	123600939	123601490	750	0	+	0	No	0.089214	No	0.283779	No	1	0
chr3	125554935	125555436	751	0	+	0	No	0	No	0	No	1	1
chr3	125615134	125615487	752	0	+	0	No	0	No	0	No	1	0
chr3	128984203	128984748	753	1	+	0.0187864	No	0	No	0	No	0	0
chr3	129065772	129066179	754	0	+	0	No	0	No	0	No	1	0
chr3	130857742	130858299	755	0	-	0	No	0	No	0	No	1	1
chr3	131284500	131285023	756	0	+	0	No	0	No	0	No	0	0
chr3	132080374	132080935	757	0	+	0	No	0	No	0	No	0	0
chr3	135475511	135476067	758	0	-	0	No	0	No	0	No	1	0
chr3	143930190	143930487	759	2	-	0.557703	No	0	No	0	No	1	0
chr3	144379302	144379754	760	0	-	0	No	0	No	0	No	1	0
chr3	145612746	145613198	764	0	+	0	No	0	No	0	No	2	0
chr3	145633151	145633701	765	0	+	0	No	0	No	0	No	1	0
chr3	145972418	145972955	766	0	+	0	No	0	No	0	No	1	0
chr3	146559569	146560143	767	0	-	0	No	0	No	0.120817	No	0	0
chr3	146699694	146700250	768	0	-	0	No	0	No	0	No	1	0
chr3	146988657	146989197	770	0	+	0	No	0	No	0	No	0	0
chr3	147538853	147539249	771	0	+	0	No	0	No	0	No	1	0
chr3	148128357	148128911	772	0	+	0	No	0	No	0	No	0	0
chr3	148134806	148135351	773	3	+	1.775	No	0	No	0	No	1	0
chr3	150010553	150011003	774	0	+	0	No	0	No	0	No	1	0
chr3	150659251	150659805	775	3	-	0.495571	No	0	No	0	No	1	0
chr3	150984648	150985144	777	0	+	0	No	0	No	0	No	1	0
chr3	153473677	153474140	779	0	+	0	No	0	No	0	No	0	1
chr3	153493403	153493866	780	0	-	0	No	0	No	0	No	1	0
chr3	153822760	153823288	781	3	-	1.30768	No	0	No	0	No	2	0
chr3	154577983	154578511	782	1	-	0.0094992	No	0	No	0	No	1	0
chr3	158630260	158630503	783	0	-	0	No	0	No	0	No	0	0
chr3	158631780	158632093	784	6	-	0.962201	Yes	0	No	0	No	2	0
chr3	158964673	158965116	785	0	-	0	No	0	No	0	No	1	0
chr3	160638600	160639044	786	2	+	0.00232272	No	0	No	0	No	0	0
chr3	160855861	160856309	787	1	-	0.000177743	No	0	No	0	No	1	0
chr3	161282195	161282741	788	0	-	0	No	0.126469	No	0	No	1	0
chr3	162639359	162639787	791	0	-	0	No	0	No	0	No	1	1
chr3	163340507	163341045	792	0	-	0	No	0	No	0	No	0	0
chr3	163638916	163639404	794	0	-	0	No	0	No	0	No	1	0
chr3	163916201	163916672	795	0	+	0	No	0	No	0	No	1	0
chr3	163918030	163918587	796	0	+	0	No	0	No	0	No	1	0
chr3	164630790	164631237	797	0	-	0	No	0	No	0	No	1	0
chr3	164647926	164648273	798	0	-	0	No	0.089214	No	0	No	0	1
chr3	165544297	165544862	800	0	+	0	No	0	No	0	No	1	0
chr3	165729716	165730259	801	0	-	0	No	0	No	0	No	1	0
chr3	165913789	165914241	802	5	-	2.48202	Yes	0	No	0	No	1	0
chr3	166352933	166353485	803	0	-	0	No	0	No	0	No	1	0
chr3	166550064	166550622	804	0	+	0	No	0	No	0	No	0	0
chr3	166600384	166600928	805	5	-	1.60553	Yes	0	No	0	No	2	0
chr3	168781706	168782113	807	0	-	0	No	0	No	0	No	1	0
chr3	168963468	168964017	808	0	-	0	No	0	No	0	No	1	0
chr3	170943947	170944339	810	0	-	0	No	0	No	0	No	2	0
chr3	171522465	171523024	811	0	+	0	No	0	No	0	No	1	0
chr3	172465690	172466248	812	0	-	0	No	0	No	0	No	1	0
chr3	173360852	173361077	813	0	+	0	No	0	No	0	No	1	0
chr3	174308119	174308681	814	0	-	0	No	0	No	0	No	1	0
chr3	175485306	175485864	815	0	-	0	No	0.089214	No	0	No	1	0
chr3	176350435	176350988	816	0	-	0	No	0	No	0	No	0	0
chr3	176841367	176841699	817	0	+	0	No	0	No	0	No	0	0
chr3	177059700	177060247	818	0	+	0	No	0	No	0	No	1	0
chr3	177556702	177557258	819	0	+	0	No	0	No	0	No	0	0
chr3	177997097	177997599	820	0	+	0	No	0	No	0.554003	No	0	0
chr3	178121116	178121654	821	0	-	0	No	0	No	0	No	1	0
chr3	178311803	178312363	822	0	+	0	No	0	No	0	No	1	0
chr3	180786283	180786777	823	9	+	1.15506	Yes	0.215683	No	0	No	2	0
chr3	187018336	187018793	825	19	-	8.01532	Yes	0	No	0	No	1	0
chr3	187106404	187106848	826	0	+	0	No	0	No	0	No	2	0
chr3	191528716	191529284	827	0	-	0	No	0	No	0	No	1	0
chr3	193018582	193019132	828	0	+	0	No	0	No	0	No	1	0
chr3	193047324	193047861	829	0	+	0	No	0	No	0	No	0	0
chr3	193196051	193196581	830	0	-	0	No	0	No	0	No	0	0
chr3	193257616	193258165	832	0	+	0	No	0.506916	No	0	No	1	0
chr3	194007714	194008246	833	0	+	0	No	0.126469	No	0	No	1	0
chr3	195744935	195745481	834	0	+	0	No	0	No	0	No	1	0
chr4	557229	557623	835	0	+	0	No	0	No	0	No	0	0
chr4	589017	589568	836	0	-	0	No	0	No	0	No	1	0
chr4	4545428	4545876	839	0	-	0	No	0	No	0	No	1	0
chr4	4632566	4633113	841	1	+	0.01754	No	0	No	0	No	1	0
chr4	5270124	5270571	842	0	-	0	No	0	No	0	No	1	0
chr4	5923737	5924285	843	1	+	0.000177743	No	0	No	0	No	1	0
chr4	6184734	6185277	844	0	+	0	No	0	No	0	No	0	0
chr4	6192890	6193445	845	0	+	0	No	0.304897	No	0	No	0	0
chr4	9858705	9859251	849	0	+	0	No	0	No	0	No	1	0
chr4	10142759	10143171	850	0	-	0	No	0	No	0	No	1	0
chr4	10235941	10236446	851	0	-	0	No	0	No	0	No	0	0
chr4	10240561	10240995	852	1	-	0.000800578	No	0	No	0	No	0	0
chr4	11173079	11173542	853	0	+	0	No	0	No	0	No	0	0
chr4	11271048	11271603	854	0	-	0	No	0	No	0	No	1	0
chr4	11928229	11928779	855	0	+	0	No	0	No	0	No	0	0
chr4	12165367	12165909	856	0	+	0	No	0	No	0	No	2	0
chr4	12298577	12299122	857	0	-	0	No	0	No	0	No	1	0
chr4	12332851	12333396	858	0	-	0	No	0	No	0	No	1	0
chr4	12374539	12375084	859	0	-	0	No	0	No	0	No	0	0
chr4	13731078	13731624	861	0	+	0	No	0	No	0.079143	No	1	0
chr4	14377857	14378253	863	0	-	0	No	0	No	0	No	1	0
chr4	14961961	14962373	865	0	-	0	No	0	No	0	No	1	0
chr4	15572648	15573156	866	0	-	0	No	0	No	0	No	0	0
chr4	15854477	15855015	867	0	-	0	No	0	No	0	No	0	0
chr4	16244950	16245387	868	0	-	0	No	0	No	0	No	1	0
chr4	16437225	16437743	869	0	-	0	No	0	No	0	No	1	0
chr4	17145208	17145727	870	0	+	0	No	0	No	0	No	0	0
chr4	17921651	17922182	871	0	+	0	No	0	No	0	No	0	0
chr4	17926170	17926749	872	0	+	0	No	0	No	0	No	1	1
chr4	18107106	18107628	873	0	-	0	No	0	No	0	No	1	0
chr4	18783986	18784419	874	0	+	0	No	0	No	0	No	2	0
chr4	18941285	18941828	876	0	+	0	No	0	No	0	No	1	0
chr4	19372612	19373082	878	0	+	0	No	0	No	0	No	1	0
chr4	19647364	19647910	880	0	-	0	No	0	No	0	No	1	0
chr4	19793893	19794449	881	0	+	0	No	0	No	0	No	1	0
chr4	20186933	20187333	882	0	+	0	No	0	No	0.079143	No	0	0
chr4	20346520	20347076	883	0	-	0	No	0.126469	No	0	No	0	0
chr4	21568381	21568910	884	0	+	0	No	0	No	0	No	1	0
chr4	22616584	22617133	885	1	+	0.158724	No	0	No	0	No	1	0
chr4	22783874	22784430	886	0	+	0	No	0.089214	No	0	No	1	0
chr4	22867034	22867593	887	0	+	0	No	0	No	0	No	1	0
chr4	23668312	23668743	888	17	-	5.67541	Yes	0	No	0	No	2	0
chr4	23762717	23763262	889	0	+	0	No	0	No	0	No	0	0
chr4	24410503	24411022	890	1	+	0.218292	No	0	No	0	No	2	0
chr4	27442698	27442943	891	0	+	0	No	0	No	0	No	1	0
chr4	27443254	27443577	892	0	+	0	No	0	No	0	No	0	0
chr4	28064321	28064771	893	0	+	0	No	0.089214	No	0	No	1	0
chr4	28132692	28133194	894	0	+	0	No	0	No	0	No	0	0
chr4	28302409	28302955	895	0	-	0	No	0	No	0	No	0	0
chr4	28376326	28376771	896	1	-	0.00184999	No	0	No	0	No	1	0
chr4	28726011	28726395	898	2	-	0.0135788	No	0	No	0	No	2	1
chr4	29459578	29460122	899	0	+	0	No	0	No	0	No	0	0
chr4	30224834	30225276	900	0	+	0	No	0	No	0	No	1	0
chr4	31154537	31154940	901	0	+	0	No	0	No	0	No	0	0
chr4	31167065	31167612	903	1	-	0.00118561	No	0	No	0	No	1	0
chr4	31598660	31599196	907	0	+	0	No	0.089214	No	0	No	0	0
chr4	31603753	31604304	909	0	-	0	No	0	No	0	No	0	0
chr4	31767874	31768407	910	0	-	0	No	0	No	0	No	1	0
chr4	32430638	32431186	911	1	-	0.202272	No	0	No	0	No	1	0
chr4	32968764	32969308	912	0	+	0	No	0	No	0	No	0	0
chr4	33691205	33691631	914	0	+	0	No	0	No	0	No	1	0
chr4	33730332	33730702	917	0	-	0	No	0	No	0	No	1	0
chr4	33736534	33736923	918	0	-	0	No	0	No	0	No	1	0
chr4	34209275	34209872	919	0	+	0	No	0	No	0	No	1	0
chr4	34500094	34500546	920	0	-	0	No	0	No	0	No	0	0
chr4	34578502	34578960	921	0	+	0	No	0	No	0.102318	No	1	0
chr4	35056963	35057507	922	0	+	0	No	0	No	0	No	1	0
chr4	35646296	35646854	923	0	-	0	No	0	No	0	No	0	0
chr4	35648785	35649334	924	0	+	0	No	0	No	0	No	1	0
chr4	35709030	35709577	925	0	-	0	No	0	No	0	No	1	0
chr4	35710973	35711243	926	0	+	0	No	0	No	0	No	0	0
chr4	35740246	35740814	927	1	+	0.000306425	No	0	No	0	No	1	0
chr4	36083756	36084268	928	0	+	0	No	0	No	0	No	1	0
chr4	36432750	36433269	929	0	-	0	No	0	No	0	No	1	0
chr4	36541508	36542001	931	0	-	0	No	0	No	0	No	1	0
chr4	38533603	38534148	932	0	+	0	No	0	No	0	No	1	0
chr4	38770301	38770728	933	0	+	0	No	0	No	0	No	1	0
chr4	38981942	38982342	936	0	+	0	No	0	No	0	No	0	0
chr4	40171605	40171916	938	0	-	0	No	0	No	0	No	0	0
chr4	40172214	40172439	939	0	-	0	No	0	No	0	No	2	0
chr4	41268744	41269252	940	0	-	0	No	0	No	0	No	1	0
chr4	42333720	42334223	941	0	-	0	No	0	No	0	No	1	0
chr4	42554720	42555085	942	0	+	0	No	0	No	0	No	0	0
chr4	43567920	43568469	944	0	-	0	No	0	No	0	No	0	0
chr4	43651583	43652132	945	0	+	0	No	0.089214	No	0	No	1	0
chr4	43925234	43925770	946	0	+	0	No	0	No	0	No	0	0
chr4	43947602	43948084	947	0	+	0	No	0	No	0	No	2	0
chr4	44192642	44193093	948	0	+	0	No	0	No	0	No	1	0
chr4	44221397	44221947	949	0	-	0	No	0	No	0	No	1	0
chr4	44495248	44495696	950	0	-	0	No	0	No	0	No	1	0
chr4	45320093	45320631	951	0	-	0	No	0	No	0	No	0	0
chr4	45403483	45404034	952	0	-	0	No	0	No	0	No	1	0
chr4	45445155	45445699	953	0	+	0	No	0	No	0	No	0	0
chr4	46291378	46291776	954	0	+	0	No	0	No	0	No	1	0
chr4	46297085	46297476	956	6	+	3.58194	Yes	0	No	0	No	1	0
chr4	46518015	46518585	957	1	-	0.66088	No	0	No	0	No	1	0
chr4	46524531	46525077	958	0	-	0	No	0	No	0	No	0	0
chr4	48161641	48162091	959	0	+	0	No	0	No	0	No	2	0
chr4	51925608	51926145	960	1	-	0.00231066	No	0	No	0	No	0	0
chr4	52682311	52682816	961	1	-	0.000177743	No	0.089214	No	0	No	0	0
chr4	52882412	52882860	962	0	+	0	No	0	No	0	No	2	0
chr4	58371091	58371611	963	0	+	0	No	0	No	0	No	1	0
chr4	58387475	58387924	964	0	+	0	No	0	No	0	No	1	0
chr4	58538154	58538705	965	0	-	0	No	0.089214	No	0	No	1	0
chr4	58836184	58836628	966	0	+	0	No	0	No	0	No	1	0
chr4	58970776	58971226	967	0	-	0	No	0	No	0	No	1	0
chr4	59882030	59882384	970	0	-	0	No	0	No	0	No	0	0
chr4	60679205	60679656	971	0	-	0	No	0	No	0	No	2	0
chr4	60821329	60821865	972	0	+	0	No	0	No	0	No	1	0
chr4	61721134	61721672	973	0	-	0	No	0	No	0	No	2	0
chr4	62161514	62161959	974	1	+	0.367574	No	0	No	0	No	2	0
chr4	62166601	62167059	975	2	+	0.00850408	No	0	No	0	No	1	0
chr4	62366267	62366810	976	3	+	0.54592	No	0	No	0	No	1	0
chr4	62417949	62418497	977	0	-	0	No	0	No	0	No	0	0
chr4	62424151	62424697	978	0	-	0	No	0	No	0	No	0	0
chr4	62808453	62808883	980	2	-	0.540533	No	0	No	0	No	2	0
chr4	62810869	62811355	981	0	+	0	No	0	No	0	No	1	0
chr4	63564436	63564945	982	0	+	0	No	0	No	0	No	0	0
chr4	63572770	63573316	984	0	+	0	No	0	No	0	No	0	0
chr4	63915554	63916115	985	0	+	0	No	0	No	0	No	1	1
chr4	64047240	64047682	987	0	+	0	No	0	No	0	No	2	0
chr4	65149506	65149928	989	0	-	0	No	0	No	0	No	1	0
chr4	65807727	65808173	990	3	+	0.682673	No	0	No	0	No	2	0
chr4	65815244	65815681	991	11	+	3.01485	Yes	0	No	0	No	2	0
chr4	65976887	65977286	992	0	+	0	No	0	No	0	No	1	0
chr4	66345064	66345598	994	0	-	0	No	0	No	0	No	1	0
chr4	66521835	66522355	995	0	-	0	No	0	No	0	No	1	0
chr4	67034554	67034940	997	0	-	0	No	0.089214	No	0	No	1	0
chr4	67154753	67155198	998	0	+	0	No	0	No	0	No	1	0
chr4	67430445	67430981	999	0	+	0	No	0	No	0	No	1	0
chr4	69532008	69532553	1000	1	+	0.0340832	No	0	No	0	No	2	0
chr4	69870079	69870433	1001	0	+	0	No	0	No	0	No	1	0
chr4	70484049	70484386	1002	0	+	0	No	0	No	0	No	0	0
chr4	70500681	70501230	1003	0	-	0	No	0	No	0	No	1	0
chr4	71990049	71990598	1004	0	+	0	No	0	No	0	No	0	0
chr4	72162209	72162718	1005	0	-	0	No	0	No	0	No	0	0
chr4	73764647	73765183	1007	0	-	0	No	0	No	0	No	1	0
chr4	74820431	74820879	1008	0	+	0	No	1.24318	No	0	No	2	0
chr4	74841989	74842436	1009	1	-	0.795373	No	0	No	0	No	2	0
chr4	76844140	76844573	1010	0	+	0	No	0	No	0	No	0	0
chr4	76878647	76879200	1012	0	+	0	No	0	No	0	No	0	0
chr4	77244353	77244886	1013	0	-	0	No	0	No	0	No	0	0
chr4	77365253	77365788	1014	0	-	0	No	0	No	0	No	1	0
chr4	78839569	78840021	1016	2	-	0.0638134	No	0	No	0	No	1	0
chr4	79493169	79493671	1017	0	+	0	No	0	No	0	No	1	0
chr4	79561839	79562384	1018	0	+	0	No	0	No	0	No	0	0
chr4	79919356	79919860	1019	0	+	0	No	0	No	0	No	1	0
chr4	80749391	80749943	1020	2	-	0.202077	No	0.126469	No	0	No	0	0
chr4	88532886	88533429	1021	4	-	0.131128	No	0	No	0	No	1	0
chr4	88853649	88854184	1022	0	+	0	No	0	No	0	No	0	0
chr4	88995269	88995811	1023	0	+	0	No	0	No	0	No	0	0
chr4	89040721	89041067	1024	0	+	0	No	0	No	0	No	0	0
chr4	89472671	89473109	1025	1	-	0.296831	No	0	No	0	No	1	0
chr4	89581700	89582226	1026	0	+	0	No	0	No	0	No	0	0
chr4	90023370	90023917	1027	0	-	0	No	0	No	0	No	0	0
chr4	91215346	91215793	1028	0	-	0	No	0	No	0	No	1	0
chr4	91512109	91512669	1029	5	+	1.68681	Yes	0	No	0	No	1	0
chr4	91823310	91823851	1031	0	-	0	No	0	No	0	No	0	0
chr4	91940677	91941200	1032	6	-	3.76349	Yes	0	No	0	No	0	0
chr4	92061648	92062090	1033	0	+	0	No	0	No	0	No	2	0
chr4	97131104	97131641	1035	0	+	0	No	0	No	0	No	1	1
chr4	97164649	97165100	1036	0	-	0	No	0	No	0	No	1	0
chr4	97170851	97171401	1037	2	-	1.02178	No	0.089214	No	0	No	1	0
chr4	97814545	97814975	1038	0	+	0	No	0	No	0	No	1	0
chr4	98005070	98005380	1039	0	-	0	No	0	No	0	No	1	0
chr4	98175126	98175562	1040	6	+	0.719213	Yes	0	No	0	No	2	0
chr4	99198612	99199104	1041	0	-	0	No	0	No	0	No	0	0
chr4	99479700	99480147	1042	0	+	0	No	0	No	0	No	1	0
chr4	100027061	100027504	1043	0	-	0	No	0	No	0	No	3	0
chr4	100033237	100033620	1045	1	-	0.179785	No	0	No	0	No	0	0
chr4	100249084	100249538	1046	0	-	0	No	0	No	0	No	1	0
chr4	100697920	100698533	1047	0	-	0	No	0	No	0	No	1	0
chr4	100756302	100756844	1048	1	-	0.00813747	No	0	No	0	No	2	0
chr4	101776695	101777196	1049	0	+	0	No	0	No	0	No	2	0
chr4	102082097	102082547	1050	0	-	0	No	0	No	0	No	1	0
chr4	102747118	102747566	1052	2	-	0.325369	No	0	No	0	No	2	0
chr4	102928613	102929174	1053	0	-	0	No	0	No	0	No	2	0
chr4	103376032	103376480	1055	0	+	0	No	0	No	0	No	1	0
chr4	104573215	104573785	1056	0	-	0	No	0	No	0	No	0	0
chr4	106524058	106524487	1057	0	+	0	No	0.089214	No	0	No	0	0
chr4	106686006	106686358	1060	0	-	0	No	0	No	0	No	0	0
chr4	107239168	107239726	1061	0	-	0	No	0	No	0	No	1	0
chr4	107373516	107374039	1062	0	+	0	No	0	No	0	No	0	0
chr4	110439089	110439535	1063	0	-	0	No	0	No	0	No	1	0
chr4	113385945	113386391	1064	0	-	0	No	0	No	0	No	0	0
chr4	114542002	114542508	1065	1	+	0.374186	No	0	No	0	No	1	0
chr4	114769188	114769672	1066	0	+	0	No	0	No	0.120817	No	0	0
chr4	115583381	115583827	1069	2	-	0.144694	No	0	No	0	No	2	1
chr4	115638969	115639518	1070	0	+	0	No	0	No	0	No	1	0
chr4	115767132	115767533	1072	0	+	0	No	0.178428	No	0	No	0	0
chr4	116262652	116263131	1073	2	+	0.0233989	No	0	No	0	No	1	0
chr4	116266391	116266856	1074	0	+	0	No	0.089214	No	0	No	1	0
chr4	116380063	116380612	1075	0	+	0	No	0	No	0	No	1	0
chr4	116534583	116535050	1076	0	+	0	No	0.126469	No	0	No	0	0
chr4	118186305	118186750	1077	0	-	0	No	0	No	0	No	1	0
chr4	123881177	123881690	1078	0	+	0	No	0.089214	No	0	No	2	0
chr4	124572724	124573313	1079	4	-	4.19685	No	0	No	0	No	1	0
chr4	125026824	125027332	1080	0	+	0	No	0	No	0	No	1	0
chr4	126186190	126186700	1083	0	-	0	No	0	No	0	No	0	0
chr4	126193319	126193866	1084	0	-	0	No	0	No	0	No	1	0
chr4	126454153	126454650	1085	1	+	0.000539062	No	0	No	0	No	0	0
chr4	126464841	126465394	1086	0	-	0	No	0	No	0	No	0	0
chr4	127168447	127168962	1087	0	+	0	No	0	No	0	No	0	0
chr4	127562820	127563264	1089	0	-	0	No	0	No	0	No	2	0
chr4	128053068	128053618	1090	0	-	0	No	0	No	0	No	1	0
chr4	129494496	129495044	1091	2	+	6.10802	No	0	No	0	No	0	0
chr4	129867781	129868329	1092	3	+	0.100848	No	0.126469	No	0	No	2	0
chr4	130380713	130381264	1093	0	+	0	No	0	No	0	No	1	0
chr4	131297774	131298324	1094	0	+	0	No	0	No	0	No	1	0
chr4	131627733	131628184	1095	0	+	0	No	0	No	0	No	0	0
chr4	132084193	132084738	1096	0	-	0	No	0	No	0	No	0	0
chr4	132093778	132094327	1097	0	-	0	No	0.126469	No	0	No	0	0
chr4	132639264	132639711	1098	0	+	0	No	0	No	0	No	0	0
chr4	132678923	132679291	1099	2	-	0.693362	No	0	No	0	No	1	1
chr4	132824875	132825394	1100	0	+	0	No	0	No	0	No	0	1
chr4	133065999	133066475	1101	0	+	0	No	0	No	0	No	0	0
chr4	133304486	133305034	1102	0	+	0	No	0	No	0	No	1	0
chr4	133408506	133409049	1103	0	+	0	No	0.150059	No	0	No	0	0
chr4	133826260	133826770	1104	0	+	0	No	0	No	0	No	1	0
chr4	134986506	134986959	1105	0	+	0	No	0	No	0	No	0	0
chr4	135634839	135635290	1106	8	+	2.18118	Yes	0	No	0	No	1	0
chr4	136126041	136126571	1107	1	-	0.761622	No	0	No	0	No	1	0
chr4	136940946	136941482	1108	0	+	0	No	0	No	0	No	1	0
chr4	137085711	137086127	1109	1	-	0.0455698	No	0	No	0	No	2	0
chr4	137266324	137266871	1110	0	+	0	No	0	No	0	No	0	0
chr4	137836136	137836486	1111	0	+	0	No	0	No	0	No	1	0
chr4	138425137	138425691	1112	0	+	0	No	0	No	0	No	1	0
chr4	139224146	139224711	1113	0	-	0	No	0	No	0	No	1	0
chr4	139442391	139442838	1114	1	+	0.0374913	No	0	No	0	No	0	0
chr4	139449372	139449816	1115	7	+	0.480507	Yes	0	No	0	No	1	0
chr4	140354977	140355200	1116	0	+	0	No	0	No	0	No	1	0
chr4	141632509	141633065	1117	0	+	0	No	0	No	0	No	1	0
chr4	146536313	146536762	1118	0	-	0	No	0	No	0	No	1	0
chr4	146673719	146674271	1120	0	+	0	No	0	No	0	No	1	0
chr4	147347890	147348339	1121	2	-	0.00752151	No	0	No	0	No	1	0
chr4	148032577	148033059	1122	8	-	2.41299	Yes	0	No	0	No	1	0
chr4	149514674	149515071	1123	1	+	0.00184914	No	0	No	0	No	0	0
chr4	149517562	149518006	1124	0	+	0	No	0	No	0	No	1	0
chr4	149665761	149666133	1125	0	+	0	No	0	No	0	No	0	0
chr4	152031782	152032320	1126	0	-	0	No	0	No	0	No	1	0
chr4	152584317	152584853	1127	0	-	0	No	0	No	0	No	0	0
chr4	153139556	153140095	1128	2	+	1.25356	No	0	No	0	No	0	0
chr4	153536747	153537156	1130	3	-	3.0674	No	0	No	0	No	0	0
chr4	154624430	154624990	1131	1	-	3.08737	No	0	No	0	No	1	0
chr4	154864706	154865159	1133	18	-	11.8166	Yes	0	No	0	No	2	0
chr4	155921532	155922054	1135	3	-	0.653537	No	0	No	0	No	1	0
chr4	156044584	156045054	1136	0	-	0	No	0	No	0	No	0	0
chr4	156542495	156543032	1137	0	-	0	No	0	No	0	No	1	0
chr4	157404174	157404723	1138	0	-	0	No	0	No	0	No	0	0
chr4	157521457	157521940	1140	0	-	0	No	0	No	0	No	1	0
chr4	158151801	158152345	1141	0	+	0	No	0	No	0	No	1	0
chr4	159513581	159514093	1142	0	-	0	No	0	No	0	No	0	0
chr4	159576188	159576627	1143	0	-	0	No	0	No	0	No	2	0
chr4	159692074	159692329	1144	0	+	0	No	0	No	0	No	1	0
chr4	160112601	160113029	1145	0	+	0	No	0	No	0	No	1	0
chr4	160119014	160119438	1146	0	+	0	No	0	No	0	No	0	0
chr4	160161480	160162008	1147	0	-	0	No	0	No	0	No	0	0
chr4	160270611	160271048	1148	0	+	0	No	0	No	0	No	1	0
chr4	160858005	160858558	1149	0	+	0	No	0	No	0	No	0	0
chr4	160902386	160902910	1150	1	+	0.0228571	No	0	No	0	No	1	0
chr4	161050253	161050747	1153	0	-	0	No	0	No	0	No	1	0
chr4	161616355	161616665	1155	0	+	0	No	0	No	0	No	1	0
chr4	162665178	162665735	1156	0	+	0	No	0	No	0	No	1	0
chr4	163023273	163023718	1157	0	+	0	No	0	No	0	No	1	0
chr4	163044052	163044602	1158	0	+	0	No	0	No	0	No	0	0
chr4	164293823	164294363	1159	0	+	0	No	0	No	0	No	1	0
chr4	165726997	165727543	1160	0	-	0	No	0	No	0	No	0	0
chr4	166244270	166244805	1161	0	-	0	No	0	No	0	No	1	0
chr4	167443109	167443657	1163	0	+	0	No	0	No	0	No	1	0
chr4	168003902	168004363	1164	0	-	0	No	0	No	0	No	0	0
chr4	168010791	168011341	1165	0	+	0	No	0	No	0	No	2	0
chr4	168383811	168384251	1166	0	+	0	No	0	No	0	No	1	0
chr4	170451393	170451776	1168	0	+	0	No	0	No	0	No	1	0
chr4	170945823	170946355	1169	0	-	0	No	0	No	0	No	0	0
chr4	171720392	171720938	1170	7	+	0.13697	Yes	0	No	0	No	1	0
chr4	171882355	171882849	1171	4	-	1.04957	No	0	No	0	No	1	0
chr4	172494449	172494990	1172	0	-	0	No	0	No	0.102318	No	0	0
chr4	173849344	173849891	1173	0	-	0	No	0	No	0	No	1	0
chr4	175235459	175235886	1174	0	+	0	No	0	No	0	No	2	0
chr4	177626100	177626645	1175	0	-	0	No	0	No	0	No	1	0
chr4	178541943	178542490	1176	0	+	0	No	0	No	0	No	0	0
chr4	179130886	179131302	1177	6	+	1.51783	Yes	0	No	0	No	1	0
chr4	179260384	179260918	1178	0	+	0	No	0	No	0	No	1	0
chr4	179668882	179669302	1179	0	+	0	No	0.300118	No	0	No	0	0
chr4	179914071	179914615	1181	0	+	0	No	0.215683	No	0	No	2	0
chr4	183084103	183084652	1182	1	+	0.000177743	No	0	No	0	No	1	0
chr4	184232930	184233482	1183	0	+	0	No	0	No	0	No	0	0
chr4	184373377	184373785	1185	0	-	0	No	0	No	0	No	2	0
chr4	184795947	184796388	1186	0	+	0	No	0	No	0	No	1	0
chr4	185851536	185851974	1189	3	+	0.396853	No	0	No	0	No	1	1
chr4	186218742	186219289	1190	0	-	0	No	0.150059	No	0	No	0	0
chr4	189281887	189282419	1191	0	+	0	No	0	No	0	No	1	0
chr5	1980140	1980688	1192	0	+	0	No	0.089214	No	0	No	1	0
chr5	2245698	2246102	1193	0	+	0	No	0	No	0	No	2	0
chr5	3941879	3942403	1195	1	-	0.523902	No	0	No	0.120817	No	1	0
chr5	3986511	3987051	1196	0	+	0	No	0	No	0	No	1	0
chr5	4955087	4955636	1197	0	-	0	No	0	No	0	No	1	0
chr5	5071997	5072514	1198	1	-	0.00142194	No	0	No	0	No	2	0
chr5	5090378	5090926	1199	0	-	0	No	0	No	0	No	1	0
chr5	5393284	5393839	1200	0	-	0	No	0	No	0	No	1	0
chr5	5904324	5904845	1201	0	+	0	No	0	No	0	No	1	0
chr5	6880304	6880626	1202	3	-	0.253363	No	0	No	0	No	2	1
chr5	7204839	7205385	1203	0	-	0	No	0	No	0	No	2	0
chr5	7651242	7651751	1204	0	-	0	No	0	No	0	No	1	0
chr5	7818869	7819317	1205	0	-	0	No	0	No	0	No	0	0
chr5	8912143	8912699	1208	0	-	0	No	0	No	0	No	0	0
chr5	9913083	9913526	1209	0	-	0	No	0	No	0	No	1	0
chr5	11662280	11662699	1213	0	-	0	No	0	No	0	No	0	0
chr5	12497535	12497987	1215	0	-	0	No	0	No	0	No	1	0
chr5	12772361	12772901	1216	0	+	0	No	0	No	0.079143	No	0	0
chr5	12916001	12916407	1218	0	-	0	No	0	No	0	No	1	0
chr5	13448150	13448698	1219	0	-	0	No	0	No	0	No	1	0
chr5	13671339	13671787	1220	0	-	0	No	0	No	0	No	1	0
chr5	14655729	14656207	1221	0	-	0	No	0	No	0	No	1	0
chr5	15046640	15047075	1222	0	+	0	No	0	No	0	No	1	0
chr5	15068399	15068915	1224	0	-	0	No	0	No	0	No	1	0
chr5	15114280	15114738	1225	1	-	0.004385	No	0.126469	No	0	No	0	0
chr5	15377917	15378457	1226	0	-	0	No	0	No	0	No	0	0
chr5	15458106	15458656	1227	0	+	0	No	0	No	0	No	1	0
chr5	18294465	18295021	1228	0	-	0	No	0	No	0	No	1	0
chr5	18994456	18995004	1229	0	-	0	No	0	No	0	No	0	0
chr5	19234893	19235409	1230	0	+	0	No	0	No	0	No	2	0
chr5	19372528	19373082	1231	0	+	0	No	0	No	0	No	1	0
chr5	19518365	19518908	1232	0	+	0	No	0	No	0	No	0	0
chr5	20889059	20889409	1233	0	-	0	No	0	No	0	No	0	0
chr5	20889675	20889950	1234	0	-	0	No	0	No	0	No	1	0
chr5	21125100	21125551	1235	1	+	0.0179329	No	0	No	0	No	0	0
chr5	21398021	21398560	1236	0	+	0	No	0	No	0	No	1	0
chr5	21470692	21470981	1237	0	+	0	No	0	No	0	No	1	0
chr5	21471006	21471257	1238	1	+	0.00125446	No	0	No	0	No	0	0
chr5	21773211	21773720	1239	0	+	0	No	0	No	0	No	1	0
chr5	21774041	21774592	1240	0	+	0	No	0	No	0	No	0	0
chr5	21860442	21860986	1241	1	+	0.781484	No	0	No	0	No	2	0
chr5	22347117	22347666	1242	0	+	0	No	0	No	0	No	1	0
chr5	22435004	22435431	1243	0	+	0	No	0.126469	No	0	No	1	0
chr5	22638126	22638670	1246	0	-	0	No	0	No	0	No	0	0
chr5	23246279	23246723	1247	0	+	0	No	0	No	0	No	2	0
chr5	23610171	23610711	1248	0	-	0	No	0	No	0	No	1	0
chr5	24068623	24068971	1249	0	-	0	No	0	No	0	No	0	0
chr5	24094132	24094637	1251	0	-	0	No	0	No	0	No	2	0
chr5	24204880	24205426	1252	1	+	0.00619484	No	0	No	0	No	1	0
chr5	24271508	24272027	1254	0	-	0	No	0.126469	No	0	No	0	0
chr5	25245387	25245823	1255	0	+	0	No	0	No	0	No	0	0
chr5	25251559	25252011	1256	0	+	0	No	0	No	0	No	1	0
chr5	25334444	25334994	1257	1	+	0.57676	No	0	No	0	No	0	0
chr5	26015460	26016003	1258	0	+	0	No	0	No	0	No	1	0
chr5	26398647	26399074	1260	0	-	0	No	0	No	0	No	0	0
chr5	26404710	26405152	1261	0	-	0	No	0	No	0	No	0	0
chr5	26701837	26702398	1262	0	+	0	No	0.126469	No	0	No	0	0
chr5	27854309	27854843	1263	0	+	0	No	0	No	0	No	1	0
chr5	27993141	27993686	1264	0	-	0	No	0	No	0	No	1	0
chr5	27997534	27998049	1265	0	+	0	No	0	No	0	No	0	0
chr5	28062459	28062877	1266	0	-	0	No	0	No	0	No	1	0
chr5	28450476	28450926	1267	1	+	1.95468	No	0	No	0	No	1	0
chr5	28501418	28501809	1269	0	-	0	No	0	No	0	No	1	0
chr5	28510379	28510804	1270	5	-	0.0477772	Yes	0.178428	No	0	No	1	0
chr5	28520204	28520748	1271	0	-	0	No	0	No	0	No	0	0
chr5	28726978	28727519	1272	0	+	0	No	0	No	0	No	1	0
chr5	28890700	28891184	1276	0	-	0	No	0	No	0	No	0	0
chr5	30134780	30135226	1277	0	-	0	No	0	No	0	No	1	0
chr5	30236860	30237433	1278	0	+	0	No	0	No	0	No	1	0
chr5	30339141	30339595	1279	0	+	0	No	0	No	0	No	2	0
chr5	30669573	30670134	1280	0	+	0	No	0	No	0.079143	No	0	0
chr5	33209962	33210517	1281	0	-	0	No	0	No	0	No	1	0
chr5	34427739	34428132	1282	0	-	0	No	0	No	0	No	1	0
chr5	34875273	34875705	1283	15	-	0.668197	Yes	0	No	0	No	1	0
chr5	36416236	36416781	1284	0	-	0	No	0	No	0	No	1	0
chr5	38763263	38763811	1285	0	+	0	No	0	No	0	No	1	0
chr5	40266584	40267129	1287	0	+	0	No	0	No	0	No	1	0
chr5	40551357	40551898	1288	0	+	0	No	0	No	0.102318	No	1	0
chr5	44939388	44939603	1289	0	+	0	No	0	No	0	No	0	0
chr5	44939925	44940173	1290	0	+	0	No	0	No	0	No	0	0
chr5	44962674	44963221	1291	0	-	0	No	0	No	0	No	0	0
chr5	44970811	44971359	1292	0	+	0	No	0	No	0	No	1	0
chr5	50694643	50695180	1293	0	-	0	No	0	No	0	No	1	0
chr5	51261288	51261729	1294	0	+	0	No	0	No	0	No	1	0
chr5	52165755	52166288	1295	2	-	0.082996	No	0	No	0	No	1	0
chr5	53162494	53163019	1296	0	-	0	No	0	No	0	No	1	0
chr5	53344220	53344658	1297	0	+	0	No	0	No	0	No	1	0
chr5	57300344	57300878	1298	0	+	0	No	0	No	0	No	1	0
chr5	57536600	57537035	1299	0	-	0	No	0	No	0	No	2	0
chr5	59991841	59992477	1300	4	+	3.28762	No	0	No	0.102318	No	1	0
chr5	60973997	60974537	1301	0	+	0	No	0.178428	No	0	No	0	0
chr5	62109479	62109982	1302	0	+	0	No	0	No	0	No	1	0
chr5	63896041	63896560	1304	0	+	0	No	0	No	0	No	0	0
chr5	64180925	64181333	1306	0	-	0	No	0.150059	No	0	No	1	0
chr5	64650162	64650706	1307	1	-	0.0170652	No	0	No	0	No	1	0
chr5	65486806	65487352	1308	10	-	0.110806	Yes	0	No	0	No	2	0
chr5	68139069	68139584	1309	2	-	0.00157351	No	0	No	0	No	2	0
chr5	72573070	72573632	1310	0	+	0	No	0	No	0	No	0	0
chr5	74785887	74786311	1311	0	+	0	No	0	No	0	No	1	0
chr5	74792199	74792516	1312	0	+	0	No	0	No	0	No	1	0
chr5	75601382	75601915	1314	0	+	0	No	0	No	0	No	1	0
chr5	78774677	78775192	1315	0	+	0	No	0	No	0	No	1	0
chr5	80032392	80032927	1316	0	-	0	No	0	No	0	No	0	0
chr5	80749084	80749611	1317	0	-	0	No	0	No	0	No	0	0
chr5	82762178	82762741	1318	0	+	0	No	0	No	0	No	1	0
chr5	84849895	84850359	1319	0	+	0	No	0	No	0	No	2	0
chr5	85211816	85212264	1320	0	+	0	No	0	No	0	No	1	0
chr5	87589073	87589460	1322	0	-	0	No	0	No	0	No	2	0
chr5	87595111	87595553	1323	2	-	0.00230787	No	0	No	0	No	2	0
chr5	89560990	89561524	1324	1	-	4.0574	No	0	No	0	No	1	0
chr5	90139760	90140196	1325	0	-	0	No	0	No	0	No	1	0
chr5	90351347	90351897	1326	0	+	0	No	0	No	0	No	1	0
chr5	91047271	91047722	1327	0	-	0	No	0	No	0	No	1	0
chr5	91603212	91603745	1328	0	-	0	No	0	No	0	No	1	0
chr5	92064735	92065277	1329	0	+	0	No	0	No	0	No	1	0
chr5	94994621	94995168	1330	1	+	0.412961	No	0	No	0	No	1	0
chr5	95370965	95371535	1331	0	+	0	No	0.126469	No	0	No	0	0
chr5	96615796	96616236	1332	0	-	0	No	0	No	0	No	1	0
chr5	97759709	97760257	1333	0	-	0	No	0	No	0	No	1	0
chr5	98696832	98697351	1334	0	+	0	No	0.089214	No	0	No	1	0
chr5	98826688	98827135	1335	0	-	0	No	0	No	0.079143	No	2	0
chr5	100973725	100974177	1337	1	+	0.396134	No	0	No	0	No	2	0
chr5	102569386	102569837	1339	0	-	0	No	0	No	0	No	1	0
chr5	103126487	103126954	1340	0	-	0	No	0	No	0	No	1	0
chr5	103860999	103861524	1341	0	+	0	No	0	No	0	No	1	0
chr5	105118024	105118533	1342	0	+	0	No	0.089214	No	0	No	0	0
chr5	105455336	105455852	1343	1	-	0.244098	No	0	No	0	No	1	0
chr5	105995800	105996243	1344	0	+	0	No	0	No	0	No	1	0
chr5	106560311	106560720	1345	0	-	0	No	0	No	0	No	0	0
chr5	106574364	106574778	1346	0	+	0	No	0	No	0	No	1	0
chr5	108393087	108393622	1347	2	-	1.43466	No	0	No	0	No	1	0
chr5	109283189	109283690	1349	1	-	0.0539613	No	0	No	0	No	1	1
chr5	110156461	110157005	1350	1	-	0.00117961	No	0	No	0	No	2	0
chr5	110412999	110413539	1351	1	+	0.0537071	No	0	No	0	No	2	0
chr5	110462274	110462788	1352	0	+	0	No	0	No	0	No	1	0
chr5	110838131	110838680	1353	0	-	0	No	0	No	0	No	0	0
chr5	110875608	110876121	1354	0	-	0	No	0.089214	No	0	No	1	0
chr5	111162225	111162616	1356	0	-	0	No	0	No	0	No	1	0
chr5	111381196	111381704	1357	0	-	0	No	0	No	0	No	1	0
chr5	112047072	112047517	1358	0	-	0	No	0	No	0	No	2	0
chr5	114329220	114329768	1360	0	+	0	No	0	No	0	No	1	0
chr5	115027084	115027630	1361	0	-	0	No	0	No	0	No	1	0
chr5	116373842	116374249	1362	1	+	0.00050688	No	0.402996	No	0	No	1	0
chr5	118570227	118570739	1365	0	+	0	No	0	No	0	No	1	0
chr5	118759546	118760101	1366	0	-	0	No	0	No	0	No	1	0
chr5	119565427	119565976	1367	0	-	0	No	0	No	0	No	1	0
chr5	120209517	120210052	1368	0	-	0	No	0	No	0	No	1	0
chr5	120215999	120216569	1369	0	-	0	No	0	No	0.079143	No	0	0
chr5	121055686	121056081	1372	0	-	0	No	0	No	0	No	1	0
chr5	121542883	121543327	1373	0	+	0	No	0	No	0.079143	No	1	0
chr5	122128711	122129243	1375	0	-	0	No	0	No	0	No	1	0
chr5	122235056	122235560	1376	0	-	0	No	0	No	0	No	1	0
chr5	122970922	122971454	1377	0	-	0	No	0	No	0	No	0	0
chr5	123048587	123049115	1378	0	-	0	No	0	No	0	No	0	0
chr5	124785058	124785504	1379	5	+	0.603075	Yes	0	No	0	No	1	0
chr5	126994647	126995196	1380	2	-	0.0243242	No	0	No	0	No	1	0
chr5	130212801	130213331	1381	0	-	0	No	0	No	0	No	1	0
chr5	131813795	131814239	1382	0	-	0	No	0.150059	No	0	No	1	0
chr5	136168915	136169469	1383	0	-	0	No	0	No	0	No	0	0
chr5	136781813	136782253	1384	1	-	0.0037326	No	0	No	0	No	0	0
chr5	140905774	140906220	1385	0	-	0	No	0	No	0	No	1	0
chr5	140911890	140912336	1386	0	-	0	No	0	No	0	No	1	0
chr5	142503966	142504485	1387	1	+	0.00480796	No	0	No	0	No	1	0
chr5	144703138	144703673	1390	1	+	0.204633	No	0	No	0	No	1	0
chr5	147642732	147643175	1391	0	+	0	No	0	No	0	No	1	0
chr5	147663179	147663624	1392	0	+	0	No	0	No	0	No	1	0
chr5	148680093	148680660	1393	0	+	0	No	0	No	0	No	0	0
chr5	150877163	150877598	1394	0	+	0	No	0	No	0	No	0	0
chr5	151472057	151472501	1395	0	-	0	No	0	No	0	No	1	0
chr5	153850612	153851202	1396	0	-	0	No	0	No	0	No	0	0
chr5	158389587	158390105	1397	6	-	1.10435	Yes	0.239273	No	0	No	1	0
chr5	161350565	161351082	1399	0	+	0	No	0	No	0	No	0	0
chr5	161621190	161621727	1400	0	-	0	No	0	No	0	No	1	0
chr5	163312124	163312711	1403	0	+	0	No	0.089214	No	0	No	2	0
chr5	166375145	166375597	1404	0	+	0	No	0	No	0	No	0	0
chr5	169446295	169446842	1406	0	+	0	No	0	No	0	No	1	0
chr5	180655017	180655223	1407	0	+	0	No	0	No	0	No	1	0
chr6	1691876	1692408	1408	0	+	0	No	0	No	0	No	0	0
chr6	4556304	4556683	1409	0	-	0	No	0	No	0	No	1	0
chr6	8361725	8362278	1410	0	-	0	No	0	No	0	No	1	0
chr6	8843470	8843918	1411	0	+	0	No	0	No	0	No	1	0
chr6	11780628	11781171	1412	1	+	0.359675	No	0	No	0	No	0	0
chr6	14069862	14070181	1414	1	+	0.00431251	No	0	No	0	No	1	0
chr6	16344295	16344852	1416	0	+	0	No	0	No	0	No	2	0
chr6	23071792	23072239	1417	0	-	0	No	0	No	0	No	2	0
chr6	23380682	23381122	1418	1	+	0.0112965	No	0	No	0	No	0	0
chr6	23639694	23640144	1419	1	-	0.00204193	No	0	No	0	No	1	0
chr6	24109559	24110119	1420	0	-	0	No	0	No	0	No	1	0
chr6	25644374	25644778	1422	0	-	0	No	0	No	0	No	1	0
chr6	26669714	26670075	1423	0	+	0	No	0	No	0	No	0	0
chr6	26831621	26831977	1424	0	-	0	No	0	No	0	No	0	0
chr6	31223243	31223678	1425	0	+	0	No	0	No	0	No	0	0
chr6	32698258	32698730	1427	4	+	2.84903	No	0	No	0	No	1	0
chr6	38605813	38606342	1428	0	+	0	No	0	No	0	No	1	0
chr6	40287557	40287986	1429	1	+	0.003984	No	0	No	0	No	2	0
chr6	40807450	40807985	1430	0	+	0	No	0	No	0.181461	No	0	0
chr6	47175689	47176231	1431	0	-	0	No	0	No	0	No	1	0
chr6	47181671	47182207	1432	2	-	2.60531	No	0.126469	No	0.079143	No	1	0
chr6	48166138	48166690	1433	0	-	0	No	0	No	0	No	0	0
chr6	48506388	48506914	1434	0	-	0	No	0	No	0	No	1	0
chr6	48553567	48554124	1435	0	-	0	No	0	No	0	No	0	0
chr6	48950596	48950980	1436	0	+	0	No	0	No	0	No	1	0
chr6	49359360	49359856	1439	0	-	0	No	0	No	0	No	0	0
chr6	50328304	50328748	1440	0	+	0	No	0	No	0	No	2	0
chr6	50354819	50355364	1441	0	+	0	No	0	No	0	No	1	0
chr6	50358657	50359102	1442	0	+	0	No	0	No	0	No	1	0
chr6	50947346	50947860	1443	0	-	0	No	0	No	0	No	1	0
chr6	52737096	52737337	1444	0	+	0	No	0	No	0	No	0	0
chr6	57873787	57874148	1446	0	-	0	No	0	No	0	No	0	0
chr6	57949272	57949828	1447	0	-	0	No	0	No	0	No	1	0
chr6	61529767	61530301	1450	0	-	0	No	0	No	0	No	1	0
chr6	62118533	62119038	1451	0	+	0	No	0	No	0	No	0	0
chr6	62209559	62210099	1452	0	+	0	No	0	No	0	No	1	0
chr6	64459392	64459924	1453	0	-	0	No	0.150059	No	0	No	0	0
chr6	64818376	64818932	1454	0	-	0	No	0.089214	No	0	No	1	0
chr6	64852141	64852545	1455	0	+	0	No	0	No	0	No	1	0
chr6	65382527	65382974	1456	0	-	0	No	0.328487	No	0	No	1	0
chr6	65624471	65625019	1457	0	+	0	No	0	No	0	No	0	0
chr6	66201494	66201946	1458	0	-	0	No	0	No	0	No	1	0
chr6	66592579	66592928	1459	3	-	1.2954	No	0	No	0	No	0	0
chr6	66605122	66605561	1461	0	-	0	No	0	No	0	No	0	0
chr6	66607185	66607729	1462	0	-	0	No	0	No	0	No	1	0
chr6	67214548	67214936	1463	0	+	0	No	0	No	0	No	0	0
chr6	67330046	67330613	1467	0	+	0	No	0	No	0	No	1	0
chr6	68437087	68437602	1469	0	+	0	No	0	No	0	No	1	1
chr6	68603037	68603377	1472	0	+	0	No	0	No	0	No	0	0
chr6	68609291	68609733	1473	0	+	0	No	0	No	0	No	1	0
chr6	69192040	69192557	1474	0	-	0	No	0	No	0	No	1	0
chr6	69570862	69571419	1475	0	+	0	No	0	No	0	No	1	0
chr6	70154520	70155076	1476	0	-	0	No	0	No	0	No	1	0
chr6	70616743	70617289	1477	0	+	0	No	0	No	0	No	1	1
chr6	72187819	72188259	1478	0	-	0	No	0	No	0	No	1	0
chr6	72192770	72193007	1479	0	-	0	No	0	No	0	No	0	0
chr6	72503570	72503846	1480	0	-	0	No	0	No	0	No	0	0
chr6	74592541	74592982	1482	0	+	0	No	0	No	0	No	0	0
chr6	75980367	75980884	1483	0	+	0	No	0	No	0	No	0	0
chr6	76546592	76546997	1484	0	+	0	No	0	No	0	No	0	0
chr6	76770031	76770516	1485	0	-	0	No	0	No	0	No	1	0
chr6	77234984	77235445	1486	16	+	12.1763	Yes	0	No	0	No	2	0
chr6	77239218	77239638	1487	7	+	2.86076	Yes	0	No	0	No	1	0
chr6	77591530	77591921	1491	0	-	0	No	0	No	0	No	1	0
chr6	77597043	77597490	1492	34	-	25.0977	Yes	0	No	0	No	1	0
chr6	78031618	78032157	1493	0	-	0	No	0	No	0	No	1	0
chr6	78179806	78180197	1494	0	-	0	No	0	No	0	No	2	0
chr6	79100998	79101511	1495	0	-	0	No	0	No	0	No	1	0
chr6	80539802	80540351	1496	0	-	0	No	0	No	0	No	1	0
chr6	80657353	80657904	1497	1	-	0.00172506	No	0	No	0	No	1	0
chr6	82873137	82873675	1499	0	+	0	No	0	No	0	No	1	0
chr6	82963376	82963824	1500	0	-	0	No	0	No	0	No	0	0
chr6	83010537	83010974	1501	4	-	1.4097	No	0	No	0	No	0	0
chr6	83016699	83017105	1502	6	-	1.16248	Yes	0	No	0	No	2	0
chr6	83776144	83776681	1503	0	-	0	No	0	No	0	No	1	0
chr6	84683238	84683775	1504	0	+	0	No	0.089214	No	0	No	1	0
chr6	86172185	86172719	1506	3	+	0.244462	No	0	No	0	No	1	0
chr6	87133805	87134255	1507	1	-	0.00109321	No	0	No	0	No	2	0
chr6	88317391	88317927	1509	0	+	0	No	0.089214	No	0	No	1	0
chr6	88658548	88659094	1510	4	+	0.0649183	No	0	No	0	No	2	0
chr6	89458294	89458837	1511	0	-	0	No	0	No	0	No	0	0
chr6	91362731	91362962	1513	0	+	0	No	0.215683	No	0	No	0	0
chr6	91364271	91364772	1514	2	+	0.00644777	No	0	No	0	No	1	0
chr6	91580217	91580769	1516	0	-	0	No	0	No	0	No	0	0
chr6	92420132	92420578	1517	5	-	0.00992896	Yes	0	No	0	No	1	0
chr6	94629780	94630232	1518	0	+	0	No	0	No	0	No	1	0
chr6	95848859	95849243	1520	0	-	0	No	0	No	0	No	0	0
chr6	96724249	96724698	1522	1	-	0.135107	No	0	No	0	No	1	0
chr6	97244374	97244799	1523	1	+	0.033094	No	0	No	0	No	1	0
chr6	98257465	98258017	1524	2	+	1.81586	No	0	No	0	No	2	0
chr6	99055936	99056457	1525	0	+	0	No	0	No	0	No	2	0
chr6	100819350	100819900	1526	0	-	0	No	0.126469	No	0.079143	No	2	0
chr6	101581314	101581526	1529	0	-	0	No	0	No	0	No	0	0
chr6	102758907	102759166	1531	0	+	0	No	0	No	0	No	0	0
chr6	102958885	102959425	1535	0	+	0	No	0	No	0	No	1	0
chr6	103160860	103161378	1536	0	+	0	No	0	No	0	No	0	0
chr6	104667841	104668325	1537	0	+	0	No	0	No	0	No	0	0
chr6	105216639	105216917	1540	0	-	0	No	0	No	0	No	1	0
chr6	105222766	105223201	1541	7	-	2.6462	Yes	0	No	0	No	1	1
chr6	110047953	110048340	1542	1	+	0.00192318	No	0	No	0	No	1	0
chr6	110845595	110845890	1543	0	+	0	No	0	No	0	No	0	0
chr6	111916162	111916607	1544	0	-	0	No	0	No	0	No	2	0
chr6	112697153	112697599	1545	2	-	2.78972	No	0	No	0	No	2	0
chr6	114370539	114371056	1546	0	-	0	No	0	No	0	No	0	0
chr6	114519695	114520205	1547	0	-	0	No	0	No	0	No	1	0
chr6	114987805	114988359	1548	1	+	0.0047372	No	0	No	0	No	1	0
chr6	115589012	115589278	1549	0	-	0	No	0	No	0	No	0	0
chr6	115589946	115590232	1550	0	-	0	No	0	No	0	No	1	0
chr6	117651748	117652298	1551	0	-	0	No	0	No	0	No	1	0
chr6	118157385	118157930	1553	0	-	0	No	0	No	0	No	1	0
chr6	118330077	118330508	1555	0	-	0	No	0	No	0	No	0	1
chr6	120035393	120035935	1556	0	+	0	No	0	No	0	No	0	0
chr6	120119802	120120313	1557	2	+	0.90025	No	0	No	0	No	1	0
chr6	120634105	120634519	1560	0	-	0	No	0	No	0	No	2	0
chr6	120841109	120841649	1561	0	+	0	No	0	No	0	No	1	0
chr6	121172981	121173445	1562	0	+	0	No	0	No	0	No	1	0
chr6	121398472	121398885	1563	0	-	0	No	0	No	0	No	0	0
chr6	122871118	122871563	1565	0	-	0	No	0	No	0	No	0	0
chr6	123137283	123137801	1566	0	+	0	No	0	No	0	No	1	0
chr6	123766816	123767360	1567	0	-	0	No	0.49221	No	0	No	0	0
chr6	126343396	126343931	1568	0	-	0	No	0	No	0	No	0	0
chr6	126709510	126709893	1569	0	-	0	No	0	No	0	No	1	0
chr6	127055661	127056209	1570	0	-	0	No	0	No	0	No	0	0
chr6	128487913	128488458	1571	0	-	0	No	0	No	0	No	0	0
chr6	129239841	129240375	1572	0	-	0	No	0	No	0	No	0	0
chr6	129406725	129407271	1573	0	-	0	No	0	No	0	No	1	0
chr6	130773482	130774028	1575	0	+	0	No	0	No	0	No	1	0
chr6	133598943	133599381	1576	0	-	0	No	0	No	0	No	1	0
chr6	133950228	133950742	1579	0	+	0	No	0	No	0	No	1	0
chr6	134085548	134086096	1580	10	+	3.82979	Yes	0	No	0	No	2	0
chr6	134734393	134734853	1581	0	-	0	No	0	No	0	No	0	0
chr6	135539594	135540044	1582	1	-	0.00218292	No	0	No	0	No	2	0
chr6	136303305	136303841	1583	0	+	0	No	0	No	0	No	0	0
chr6	137141854	137142392	1584	0	-	0	No	0	No	0	No	1	0
chr6	138704423	138704947	1585	1	-	0.38717	No	0	No	0	No	1	0
chr6	140329783	140330345	1586	0	-	0	No	0	No	0	No	1	0
chr6	140335940	140336490	1587	0	-	0	No	0	No	0	No	1	0
chr6	140655714	140656264	1588	1	+	0.395511	No	0	No	0	No	1	0
chr6	140936249	140936780	1589	0	+	0	No	0	No	0	No	1	0
chr6	141855289	141855835	1590	0	-	0	No	0	No	0	No	0	0
chr6	142030076	142030610	1591	4	-	0.356564	No	0.389332	No	3.11528	No	0	1
chr6	142488347	142488778	1592	1	-	0.0058956	No	0	No	0	No	0	0
chr6	142961106	142961578	1594	0	+	0	No	0	No	0	No	0	0
chr6	144035111	144035661	1595	0	-	0	No	0	No	0	No	1	0
chr6	144070311	144070761	1596	0	+	0	No	0	No	0	No	1	0
chr6	144815327	144815881	1597	0	-	0	No	0	No	0	No	1	0
chr6	144859877	144860393	1598	0	+	0	No	0	No	0	No	1	0
chr6	145750400	145750948	1599	0	+	0	No	0.126469	No	0	No	0	0
chr6	146539392	146539932	1600	0	-	0	No	0	No	0	No	1	0
chr6	146854795	146855346	1601	0	+	0	No	0	No	0	No	1	0
chr6	147828335	147828786	1602	0	+	0	No	0	No	0	No	1	0
chr6	147920051	147920596	1603	0	+	0	No	0	No	0	No	1	0
chr6	148676342	148676798	1604	0	-	0	No	0	No	0	No	1	0
chr6	148688846	148689361	1605	0	+	0	No	0	No	0	No	1	0
chr6	148706788	148707351	1606	0	-	0	No	0	No	0	No	0	0
chr6	148858070	148858496	1607	0	-	0	No	0	No	0	No	0	0
chr6	149462520	149463067	1609	0	+	0	No	0	No	0	No	1	0
chr6	151482836	151483276	1610	0	-	0	No	0	No	0	No	1	0
chr6	151972666	151973180	1611	0	-	0	No	0	No	0	No	1	0
chr6	152037894	152038438	1612	0	-	0	No	0.089214	No	0	No	0	0
chr6	152044388	152044933	1613	0	-	0	No	0	No	0	No	1	0
chr6	152765901	152766454	1614	1	-	2.18366	No	0	No	0	No	0	0
chr6	152909733	152910252	1615	0	+	0	No	0	No	0	No	0	0
chr6	153193023	153193560	1616	0	+	0	No	0	No	0	No	0	0
chr6	153528085	153528624	1617	0	-	0	No	0	No	0	No	1	0
chr6	153851132	153851535	1618	0	+	0	No	0	No	0	No	0	0
chr6	153999088	153999463	1621	0	-	0	No	0	No	0	No	1	0
chr6	154305578	154306109	1622	0	+	0	No	0	No	0	No	0	0
chr6	155667819	155668361	1623	1	+	0.063632	No	0	No	0	No	0	0
chr6	155901506	155901957	1624	0	+	0	No	0	No	0	No	1	0
chr6	156273841	156274264	1625	0	+	0	No	0	No	0	No	1	0
chr6	158359322	158359770	1627	0	-	0	No	0	No	0	No	0	0
chr6	158415785	158416335	1628	0	-	0	No	0	No	0	No	0	0
chr6	159148520	159149037	1629	0	+	0	No	0	No	0	No	1	0
chr6	159310267	159310706	1630	0	+	0	No	0	No	0	No	3	0
chr6	159371341	159371785	1632	2	-	0.0107236	No	0	No	0	No	1	0
chr6	160505191	160505582	1634	0	-	0	No	0	No	0	No	1	0
chr6	160654091	160654509	1636	0	-	0	No	0	No	0	No	1	0
chr6	160658927	160659200	1637	0	-	0	No	0	No	0	No	0	0
chr6	161307117	161307669	1638	0	-	0	No	0	No	0	No	0	0
chr6	161456071	161456620	1639	0	+	0	No	0	No	0	No	1	0
chr6	161711559	161712116	1640	0	+	0	No	0	No	0	No	1	0
chr6	161906613	161907110	1641	0	-	0	No	0	No	0	No	0	0
chr6	162156252	162156791	1642	1	-	0.000973796	No	0	No	0	No	1	0
chr6	163270880	163271397	1643	0	-	0	No	0	No	0	No	1	0
chr6	163677217	163677775	1644	1	+	0.0579453	No	0	No	0	No	1	0
chr6	163696330	163696884	1645	0	-	0	No	0	No	0	No	0	0
chr6	164053283	164053803	1647	0	+	0	No	0	No	0	No	1	0
chr6	164171697	164172230	1648	0	+	0	No	0	No	0	No	1	0
chr6	164243469	164243918	1649	0	+	0	No	0	No	0	No	1	0
chr6	164250430	164250825	1650	0	+	0	No	0	No	0	No	1	0
chr6	164754987	164755528	1653	1	+	0.00106746	No	0	No	0	No	1	1
chr6	164759755	164760303	1654	0	+	0	No	0	No	0	No	1	0
chr6	164807536	164808069	1655	1	-	0.000177743	No	0	No	0	No	0	0
chr6	164813749	164814293	1656	0	-	0	No	0	No	0	No	1	0
chr6	164831120	164831676	1657	0	+	0	No	0	No	0	No	0	0
chr6	165132260	165132566	1659	0	-	0	No	0	No	0	No	0	0
chr6	165194330	165194798	1661	0	+	0	No	0	No	0	No	1	0
chr6	166015041	166015560	1662	0	+	0	No	0	No	0	No	0	0
chr6	166145442	166145976	1663	0	+	0	No	0	No	0	No	1	0
chr6	166596245	166596804	1664	0	+	0	No	0	No	0	No	0	0
chr6	167062922	167063389	1665	0	-	0	No	0	No	0	No	2	0
chr6	168772138	168772680	1667	0	+	0	No	0	No	0	No	0	0
chr6	168911943	168912487	1668	0	+	0	No	0.300118	No	0	No	0	0
chr6	168998791	168999241	1669	0	-	0	No	0	No	0	No	0	0
chr6	169098601	169099145	1670	0	+	0	No	0	No	0.47486	No	1	0
chr6	169563907	169564464	1671	0	-	0	No	0	No	0	No	0	0
chr7	3129178	3129683	1672	0	-	0	No	0	No	0	No	1	0
chr7	3270899	3271339	1673	0	-	0	No	0	No	0	No	2	0
chr7	4341311	4341829	1675	0	-	0	No	0	No	0	No	1	0
chr7	4402589	4403134	1676	0	-	0	No	0	No	0	No	1	0
chr7	7721758	7722256	1677	1	+	0.0012257	No	0	No	0	No	1	0
chr7	7727495	7728024	1678	0	+	0	No	0.150059	No	0	No	1	0
chr7	8920288	8920835	1679	2	-	0.459995	No	0	No	0	No	1	0
chr7	9816119	9816513	1681	1	-	0.412961	No	0	No	0	No	1	0
chr7	10550951	10551494	1682	0	+	0	No	0	No	0	No	1	0
chr7	12043586	12044134	1683	0	-	0	No	0	No	0	No	0	0
chr7	13691647	13692190	1684	0	+	0	No	0	No	0	No	1	0
chr7	13822409	13822951	1685	6	+	3.08961	Yes	0	No	0	No	0	0
chr7	13868671	13869203	1686	1	-	0.235441	No	0	No	0	No	0	0
chr7	13876878	13877414	1688	0	+	0	No	0	No	0	No	1	0
chr7	15018226	15018771	1689	0	+	0	No	0	No	0	No	0	0
chr7	15033230	15033667	1690	0	+	0	No	0	No	0	No	1	0
chr7	17167567	17167846	1692	0	-	0	No	0	No	0	No	0	0
chr7	19246967	19247293	1694	0	-	0	No	0	No	0	No	0	0
chr7	19644413	19644959	1695	0	+	0	No	0	No	0	No	0	0
chr7	19794839	19795384	1696	0	+	0	No	0.126469	No	0	No	0	0
chr7	21560294	21560840	1698	0	-	0	No	0	No	0	No	1	0
chr7	21606933	21607476	1699	0	-	0	No	0	No	0	No	0	0
chr7	22045399	22045874	1700	1	+	0.00436584	No	0	No	0	No	1	0
chr7	25690831	25691359	1701	0	-	0	No	0	No	0	No	0	0
chr7	26996591	26997073	1702	1	+	0.00648062	No	0.126469	No	0	No	1	0
chr7	27008873	27009322	1703	0	+	0	No	0	No	0	No	1	0
chr7	34428230	34428775	1705	0	+	0	No	0	No	0	No	1	1
chr7	34625132	34625548	1706	0	+	0	No	0	No	0	No	0	0
chr7	34933456	34933968	1707	0	+	0	No	0	No	0	No	1	0
chr7	37672564	37673079	1709	0	+	0	No	0	No	0	No	0	0
chr7	38815520	38816005	1710	0	+	0	No	0	No	0	No	2	0
chr7	39544577	39545124	1711	0	-	0	No	0	No	0	No	0	0
chr7	40429315	40429837	1712	0	-	0	No	0	No	0	No	1	0
chr7	40807674	40808117	1713	0	-	0	No	0	No	0	No	1	0
chr7	41518295	41518822	1714	1	-	0.0353708	No	0	No	0	No	1	0
chr7	41636664	41637170	1715	0	-	0	No	0	No	0	No	1	0
chr7	43752760	43753192	1716	0	+	0	No	0	No	0	No	2	0
chr7	44778794	44779325	1717	0	-	0	No	0	No	0	No	0	0
chr7	46503102	46503508	1719	0	-	0	No	0	No	0	No	1	0
chr7	47155718	47156261	1720	1	-	0.658164	No	0	No	0	No	0	0
chr7	49291682	49292223	1721	0	-	0	No	0	No	0	No	0	0
chr7	49737753	49738249	1722	0	+	0	No	0	No	0	No	0	0
chr7	51001202	51001647	1724	0	-	0	No	0	No	0	No	0	0
chr7	52422099	52422605	1725	3	-	0.749394	No	0	No	0	No	1	0
chr7	53570279	53570718	1726	0	-	0	No	0	No	0	No	1	0
chr7	53593411	53593854	1727	0	-	0	No	0	No	0	No	1	0
chr7	54121939	54122322	1729	0	-	0	No	0	No	0	No	1	0
chr7	54127943	54128405	1730	0	-	0	No	0	No	0	No	0	0
chr7	55253654	55254204	1731	2	+	0.349192	No	0	No	0.079143	No	1	0
chr7	63181584	63182035	1732	0	-	0	No	0	No	0	No	1	0
chr7	66906389	66906836	1733	0	-	0	No	0	No	0	No	1	0
chr7	66909344	66909789	1734	0	-	0	No	0	No	0	No	2	0
chr7	67131581	67132130	1735	0	-	0	No	0	No	0	No	0	0
chr7	67410998	67411204	1736	1	+	0.197028	No	0	No	0	No	1	0
chr7	67411518	67411778	1737	0	+	0	No	0	No	0	No	0	0
chr7	67647099	67647645	1738	0	-	0	No	0	No	0	No	1	0
chr7	67703745	67704178	1739	0	-	0	No	0	No	0	No	1	0
chr7	68002978	68003430	1740	0	-	0	No	0	No	0	No	0	0
chr7	68042620	68042968	1742	0	+	0	No	0	No	0	No	0	0
chr7	68043559	68044118	1743	0	+	0	No	0	No	0	No	0	0
chr7	68432944	68433491	1744	0	+	0	No	0	No	0	No	1	0
chr7	68589909	68590344	1745	1	-	0.178267	No	0	No	0	No	1	0
chr7	68760736	68761187	1746	1	-	0.00109639	No	0	No	0	No	1	0
chr7	71001963	71002511	1747	0	+	0	No	0	No	0	No	0	0
chr7	71037071	71037414	1748	0	-	0	No	0	No	0	No	0	0
chr7	71038962	71039165	1749	0	-	0	No	0	No	0	No	0	0
chr7	71191820	71192377	1750	0	-	0	No	0	No	0	No	0	0
chr7	71433765	71434311	1751	1	+	0.0098056	No	0	No	0	No	1	0
chr7	71438100	71438534	1752	0	-	0	No	0	No	0	No	1	0
chr7	71880857	71881407	1753	0	+	0	No	0	No	0	No	0	0
chr7	76015685	76016104	1754	0	+	0	No	0	No	0	No	1	0
chr7	79987859	79988392	1756	0	+	0	No	0	No	0	No	1	0
chr7	80117364	80117896	1757	0	+	0	No	0	No	0	No	1	0
chr7	81162809	81163363	1758	0	+	0	No	0	No	0	No	1	0
chr7	81280310	81280891	1759	0	+	0	No	0	No	0	No	0	0
chr7	81455848	81456421	1760	0	+	0	No	0	No	0	No	0	0
chr7	82484826	82485272	1761	0	+	0	No	0	No	0	No	1	0
chr7	82852228	82852767	1762	0	+	0	No	0	No	0	No	1	0
chr7	83900663	83901112	1763	0	-	0	No	0	No	0	No	1	0
chr7	84298708	84299220	1764	0	+	0	No	0	No	0	No	1	0
chr7	84509920	84510465	1767	0	+	0	No	0	No	0	No	0	0
chr7	85405415	85405942	1768	0	+	0	No	0	No	0	No	1	0
chr7	86087738	86088186	1769	0	+	0	No	0	No	0	No	1	1
chr7	86093848	86094294	1770	0	+	0	No	0.089214	No	0	No	0	1
chr7	87395032	87395468	1771	0	-	0	No	0	No	0	No	0	0
chr7	87997805	87998332	1772	0	-	0	No	0	No	0	No	1	0
chr7	92155564	92156119	1774	0	-	0	No	0	No	0	No	2	0
chr7	93627380	93627911	1775	0	+	0	No	0	No	0	No	1	0
chr7	93902084	93902477	1777	1	-	0.289418	No	0	No	0	No	1	0
chr7	97282597	97283036	1778	0	+	0	No	0	No	0	No	0	0
chr7	98635896	98636435	1779	0	+	0	No	0.089214	No	0	No	1	0
chr7	98772993	98773326	1780	0	-	0	No	0	No	0	No	0	0
chr7	99886491	99886824	1782	0	+	0	No	0	No	0	No	0	0
chr7	101393196	101393634	1783	0	-	0	No	0	No	0	No	1	0
chr7	101505463	101505861	1784	0	-	0	No	0	No	0	No	1	0
chr7	101607055	101607489	1785	3	+	0.248182	No	0	No	0	No	1	0
chr7	101632147	101632519	1786	0	-	0	No	0	No	0	No	1	0
chr7	105421758	105422261	1790	0	-	0	No	0	No	0	No	1	0
chr7	108587316	108587822	1791	0	-	0	No	0	No	0	No	0	0
chr7	109088981	109089521	1792	0	-	0	No	0	No	0	No	1	0
chr7	109114258	109114710	1793	0	-	0	No	0	No	0	No	1	0
chr7	109802497	109802951	1794	0	-	0	No	0	No	0	No	1	0
chr7	109827749	109828135	1796	0	-	0	No	0	No	0	No	1	1
chr7	110091078	110091523	1797	0	-	0	No	0	No	0	No	1	0
chr7	110730104	110730516	1798	1	+	0.00151665	No	0	No	0	No	1	0
chr7	110919742	110920295	1800	0	+	0	No	0	No	0	No	2	0
chr7	111065433	111065899	1801	0	+	0	No	0	No	0	No	1	0
chr7	111333518	111333960	1803	0	+	0	No	0.126469	No	0	No	1	0
chr7	112592911	112593462	1804	10	+	7.25526	Yes	0	No	0	No	0	0
chr7	112723528	112724041	1805	0	-	0	No	0	No	0	No	1	0
chr7	113646551	113647069	1806	3	-	0.193776	No	0	No	0	No	1	0
chr7	113730023	113730469	1807	0	+	0	No	0	No	0	No	1	0
chr7	113971082	113971627	1808	0	-	0	No	0	No	0	No	1	0
chr7	114901652	114902199	1809	0	-	0	No	0	No	9.20271	Yes	0	1
chr7	115328132	115328641	1810	0	-	0	No	0	No	0	No	1	0
chr7	115800157	115800608	1811	0	+	0	No	0	No	0	No	1	0
chr7	116287019	116287556	1812	0	-	0	No	0	No	0	No	0	0
chr7	117978832	117979339	1813	0	-	0	No	0	No	0	No	1	0
chr7	118362083	118362528	1814	0	+	0	No	0	No	0	No	2	0
chr7	118474269	118474818	1815	0	-	0	No	0	No	0	No	1	0
chr7	119184156	119184707	1816	1	+	0.0100629	No	0	No	0	No	2	0
chr7	119190622	119191167	1817	0	+	0	No	0	No	0	No	2	0
chr7	119220073	119220625	1818	0	-	0	No	0	No	0	No	1	0
chr7	120215511	120216045	1819	0	+	0	No	0	No	0	No	0	0
chr7	120575036	120575613	1820	0	-	0	No	0	No	0	No	1	0
chr7	121794335	121794725	1821	0	+	0	No	0	No	0	No	1	0
chr7	122202628	122203019	1824	2	-	0.629682	No	0	No	0	No	2	0
chr7	122208641	122209105	1825	0	-	0	No	0	No	0	No	2	1
chr7	122287159	122287496	1826	0	-	0	No	0	No	0	No	2	0
chr7	124193224	124193816	1827	0	-	0	No	0	No	0	No	1	0
chr7	124614637	124615082	1828	0	+	0	No	0	No	0	No	1	0
chr7	124780837	124781383	1829	0	-	0	No	0	No	0	No	1	0
chr7	125276523	125276837	1831	0	-	0	No	0	No	0	No	0	0
chr7	125583001	125583241	1833	0	-	0	No	0	No	0	No	1	0
chr7	125612213	125612726	1834	0	+	0	No	0	No	0	No	0	0
chr7	125798788	125799312	1835	0	-	0	No	0	No	0	No	0	0
chr7	125807742	125808252	1836	0	-	0	No	0	No	0	No	2	0
chr7	125943228	125943442	1837	1	+	0.0947347	No	0	No	0	No	0	0
chr7	126649146	126649593	1838	1	+	0.00723631	No	0	No	0	No	1	0
chr7	126652368	126652841	1839	0	+	0	No	0	No	0	No	1	0
chr7	126981997	126982401	1841	4	-	1.58423	No	0	No	0	No	1	0
chr7	126984272	126984721	1842	0	+	0	No	0	No	0	No	1	0
chr7	127211048	127211588	1843	0	-	0	No	0	No	0	No	1	0
chr7	127318700	127319134	1844	0	-	0	No	0	No	0	No	0	0
chr7	132590316	132590835	1845	0	-	0	No	0	No	0	No	0	0
chr7	132656474	132657009	1846	0	+	0	No	0	No	0	No	1	0
chr7	133693012	133693559	1847	0	-	0	No	0	No	0	No	0	0
chr7	134096408	134096951	1848	0	-	0	No	0	No	0	No	0	0
chr7	134502520	134503036	1849	2	-	0.608922	No	0	No	0	No	2	1
chr7	138196701	138197144	1850	1	+	0.213292	No	0	No	0	No	2	0
chr7	138255375	138255835	1851	0	+	0	No	0	No	0	No	1	0
chr7	138966347	138966795	1852	6	-	0.705624	Yes	0	No	0	No	1	0
chr7	139443813	139444309	1854	0	-	0	No	0	No	0	No	1	0
chr7	141950611	141951151	1855	0	+	0	No	0	No	0	No	1	0
chr7	142679731	142680272	1856	1	+	0.136332	No	0	No	0	No	1	0
chr7	143963454	143964009	1857	0	-	0	No	0	No	0	No	1	0
chr7	146167722	146168260	1858	0	-	0	No	0	No	0	No	1	0
chr7	147219176	147219723	1859	0	-	0	No	0	No	0	No	0	0
chr7	147838891	147839337	1860	0	-	0	No	0	No	0	No	2	0
chr7	148240592	148241103	1861	1	-	0.444317	No	0	No	0	No	0	0
chr7	148298446	148298678	1862	0	-	0	No	0	No	0	No	0	0
chr7	153535445	153536007	1864	0	+	0	No	0	No	0	No	1	0
chr7	153597865	153598293	1865	0	+	0	No	0	No	0	No	2	0
chr7	153693719	153694273	1866	0	-	0	No	0	No	0	No	1	0
chr7	156276792	156277342	1868	0	-	0	No	0	No	0	No	1	0
chr7	158309125	158309558	1869	0	+	0	No	0	No	0	No	1	0
chr8	528853	529257	1871	0	-	0	No	0	No	0	No	1	0
chr8	1436042	1436588	1873	0	-	0	No	0	No	0	No	1	0
chr8	2196443	2196989	1874	0	-	0	No	0	No	0	No	1	0
chr8	2207201	2207745	1875	0	+	0	No	0	No	0	No	0	0
chr8	2331075	2331608	1877	0	-	0	No	0	No	0	No	1	0
chr8	2390118	2390651	1878	0	+	0	No	0	No	0	No	1	0
chr8	4987619	4988100	1881	0	+	0	No	0	No	0	No	1	0
chr8	6122923	6123491	1882	0	-	0	No	0	No	0	No	1	0
chr8	9228939	9229477	1883	0	-	0	No	0	No	0	No	0	0
chr8	13785280	13785827	1884	0	+	0	No	0	No	0	No	1	0
chr8	14479020	14479557	1886	0	-	0	No	0	No	0	No	1	1
chr8	15966918	15967436	1887	0	+	0	No	0	No	0	No	1	0
chr8	16065625	16066170	1888	1	+	0.000525733	No	0	No	0	No	1	0
chr8	18153547	18153997	1889	0	+	0	No	0	No	0	No	1	1
chr8	18392185	18392701	1890	0	-	0	No	0	No	0	No	1	0
chr8	19338858	19339407	1891	0	-	0	No	0	No	0	No	0	0
chr8	20998921	20999464	1892	0	+	0	No	1.19018	No	0	No	1	0
chr8	21046317	21046871	1893	0	-	0	No	0.150059	No	0	No	0	0
chr8	21221907	21222314	1895	0	+	0	No	0	No	0	No	0	0
chr8	21665085	21665633	1897	1	+	0.00325498	No	0	No	0	No	0	0
chr8	24165312	24165768	1899	0	-	0	No	0	No	0	No	0	0
chr8	24227319	24227776	1900	1	-	0.114579	No	0	No	0	No	1	0
chr8	24687456	24687960	1901	0	+	0	No	0	No	0	No	0	0
chr8	24838135	24838453	1902	1	+	0.00146167	No	0	No	0	No	1	0
chr8	26146389	26146837	1903	0	+	0	No	0	No	0	No	0	0
chr8	27223153	27223656	1904	0	+	0	No	0.178428	No	0	No	0	0
chr8	29532673	29533115	1905	0	+	0	No	0	No	0	No	2	0
chr8	29983603	29984157	1906	0	+	0	No	0	No	0	No	1	0
chr8	33186073	33186607	1909	10	-	4.15459	Yes	0	No	0	No	1	0
chr8	34929425	34929862	1910	0	-	0	No	0	No	0	No	1	0
chr8	35547789	35548235	1911	0	-	0	No	0	No	0	No	0	0
chr8	35814238	35814786	1912	0	+	0	No	0	No	0	No	1	0
chr8	35974214	35974662	1913	0	-	0	No	0	No	0	No	1	0
chr8	37113158	37113586	1916	2	-	0.00616283	No	0	No	0	No	0	0
chr8	37131305	37131834	1917	1	-	0.000364403	No	0	No	0	No	1	0
chr8	37426057	37426599	1918	0	+	0	No	0	No	0	No	1	0
chr8	39348807	39349338	1919	0	+	0	No	0	No	0.102318	No	0	0
chr8	40417162	40417612	1920	0	-	0	No	0	No	0	No	1	0
chr8	40757717	40758227	1921	0	+	0	No	0	No	0	No	1	0
chr8	49020645	49021030	1923	0	-	0	No	0	No	0	No	2	0
chr8	50171168	50171643	1924	0	-	0	No	0	No	0	No	1	0
chr8	51101283	51101826	1925	0	-	0	No	0	No	0	No	1	0
chr8	51267510	51268053	1926	0	-	0	No	0	No	0	No	1	0
chr8	51490865	51491311	1927	0	+	0	No	0	No	0	No	1	0
chr8	55548856	55549412	1928	0	+	0	No	0	No	0	No	1	0
chr8	59544056	59544540	1929	0	-	0	No	0	No	0	No	1	0
chr8	62891041	62891585	1930	0	+	0	No	0	No	0	No	1	0
chr8	63328350	63328797	1931	1	+	0.000961587	No	0	No	0	No	0	0
chr8	63496360	63496903	1932	0	-	0	No	0	No	0	No	1	0
chr8	65279393	65279945	1933	0	-	0	No	0	No	0	No	1	0
chr8	66192500	66193053	1934	0	+	0	No	0	No	0	No	1	0
chr8	68201317	68201766	1936	0	-	0	No	0	No	0	No	0	0
chr8	71416832	71417283	1937	1	+	0.000841329	No	0	No	0	No	1	0
chr8	73123421	73123779	1939	2	-	1.4621	No	0	No	0	No	0	0
chr8	73260740	73261261	1941	2	+	1.36944	No	0	No	0	No	1	0
chr8	74407263	74407711	1942	0	+	0	No	0.178428	No	0	No	0	0
chr8	75669628	75669845	1943	0	+	0	No	0	No	0	No	0	0
chr8	77084808	77085345	1944	0	+	0	No	0	No	0	No	0	0
chr8	78362025	78362462	1946	0	-	0	No	0.126469	No	0	No	0	0
chr8	80932459	80933008	1947	0	+	0	No	0	No	0	No	1	0
chr8	81587730	81588243	1948	0	-	0	No	0	No	0	No	1	0
chr8	82103192	82103737	1949	0	+	0	No	0	No	0	No	0	0
chr8	83150996	83151246	1950	0	+	0	No	0	No	0	No	2	0
chr8	83490036	83490594	1952	0	-	0	No	0	No	0	No	1	0
chr8	83828403	83828891	1954	0	-	0	No	0	No	0	No	1	0
chr8	85604180	85604615	1955	0	-	0	No	0	No	0	No	0	0
chr8	86277341	86277786	1956	0	+	0	No	0	No	0	No	1	0
chr8	86770497	86771046	1957	0	-	0	No	0	No	0	No	1	0
chr8	88740164	88740715	1958	0	+	0	No	0	No	0	No	1	1
chr8	89006920	89007438	1959	0	+	0	No	0	No	0	No	1	0
chr8	89448796	89449230	1960	0	+	0	No	0	No	0	No	0	0
chr8	89454821	89455259	1961	0	+	0	No	0	No	0	No	1	0
chr8	90409674	90410220	1962	0	-	0	No	0	No	0	No	1	0
chr8	90416345	90416888	1963	0	-	0	No	0	No	0	No	1	0
chr8	90506547	90506992	1965	0	+	0	No	0	No	0	No	0	0
chr8	90915565	90916128	1966	0	-	0	No	0	No	0	No	1	0
chr8	91091361	91091905	1967	0	+	0	No	0	No	0	No	1	0
chr8	92153506	92153945	1968	1	+	0.001036	No	0	No	0	No	2	0
chr8	92416492	92417037	1969	0	+	0	No	0	No	0	No	1	0
chr8	95946478	95946914	1970	0	+	0	No	0	No	0	No	0	0
chr8	96889471	96890004	1971	0	-	0	No	0	No	0.102318	No	1	0
chr8	99125012	99125558	1972	0	-	0	No	0	No	0	No	0	0
chr8	101739391	101739933	1973	0	+	0	No	0	No	0	No	1	0
chr8	101858949	101859494	1974	0	+	0	No	0	No	0	No	1	0
chr8	103564341	103564878	1975	0	-	0	No	0	No	0	No	1	1
chr8	104637180	104637719	1976	0	-	0	No	0	No	0	No	0	0
chr8	104993031	104993576	1977	0	-	0	No	0.126469	No	0	No	0	0
chr8	106092545	106093013	1979	0	+	0	No	0	No	0	No	1	0
chr8	107646038	107646595	1981	0	-	0	No	0	No	0	No	1	0
chr8	108766597	108767155	1982	0	-	0	No	0	No	0	No	0	0
chr8	109205542	109206087	1983	0	-	0	No	0	No	0	No	1	0
chr8	109910963	109911406	1984	0	-	0	No	0	No	0	No	1	0
chr8	110234438	110234844	1986	0	-	0	No	0	No	0	No	0	0
chr8	113696325	113696788	1989	0	+	0	No	0	No	0	No	0	0
chr8	113994171	113994384	1990	0	+	0	No	0	No	0	No	0	0
chr8	114152196	114152718	1991	0	+	0	No	0	No	0	No	0	0
chr8	115073031	115073577	1993	0	+	0	No	74.7512	Yes	0	No	0	0
chr8	116621342	116621889	1994	1	+	0.27517	No	0	No	0	No	2	0
chr8	116805453	116805967	1995	0	-	0	No	0	No	0	No	0	0
chr8	116905719	116906141	1996	1	+	0.0832324	No	0	No	0	No	1	0
chr8	117101536	117101987	1997	0	+	0	No	0	No	0	No	1	0
chr8	120719074	120719472	1998	0	+	0	No	0	No	0	No	1	0
chr8	120853490	120853934	1999	0	-	0	No	0	No	0	No	2	0
chr8	121144690	121145135	2000	2	-	0.0053004	No	0	No	0	No	2	0
chr8	122366355	122366825	2001	0	+	0	No	0	No	0	No	1	0
chr8	122370747	122371265	2002	0	+	0	No	0	No	0	No	0	0
chr8	122725968	122726415	2003	0	+	0	No	0	No	0	No	1	0
chr8	123061659	123062068	2004	0	+	0	No	0	No	0	No	2	0
chr8	123830834	123831283	2005	0	+	0	No	0	No	0	No	1	0
chr8	124205848	124206333	2006	0	+	0	No	0	No	0	No	1	0
chr8	124949129	124949681	2008	0	+	0	No	0	No	0	No	1	0
chr8	125871286	125871714	2009	1	-	0.525182	No	0	No	0	No	1	0
chr8	126206111	126206562	2010	0	+	0	No	0	No	0.120817	No	1	0
chr8	128792182	128792727	2012	0	-	0	No	0	No	0	No	1	0
chr8	129248175	129248622	2013	0	-	0	No	0	No	0	No	1	0
chr8	130573149	130573544	2014	0	+	0	No	0	No	0	No	1	0
chr8	131160667	131161048	2017	0	-	0	No	0	No	0	No	3	0
chr8	131491987	131492501	2018	2	+	0.540502	No	0	No	0	No	2	0
chr8	131641200	131641632	2019	0	+	0	No	0	No	0	No	1	0
chr8	132308901	132309313	2020	0	+	0	No	0.126469	No	0	No	1	0
chr8	132507909	132508421	2021	0	-	0	No	0	No	0	No	1	0
chr8	133512071	133512572	2023	0	-	0	No	0.150059	No	0.102318	No	0	0
chr8	134961813	134962360	2024	0	+	0	No	0	No	0	No	1	0
chr8	135159589	135160138	2025	0	+	0	No	0	No	0	No	0	0
chr8	135764898	135765362	2026	0	+	0	No	0	No	0	No	2	0
chr8	135922536	135923087	2027	0	+	0	No	0	No	0	No	1	1
chr8	136183909	136184459	2028	1	-	0.00109639	No	0	No	0	No	1	0
chr8	136284232	136284696	2029	0	-	0	No	0	No	0	No	0	0
chr8	137520552	137521101	2030	0	+	0	No	0	No	0	No	1	0
chr8	137624677	137625188	2031	0	-	0	No	0	No	0	No	0	0
chr8	138571395	138571943	2032	1	+	0.000961587	No	0	No	0.120817	No	1	0
chr8	139104062	139104610	2033	0	-	0	No	0	No	0	No	1	0
chr8	139188367	139188904	2034	0	-	0	No	0	No	0	No	0	0
chr8	139509887	139510422	2035	1	-	0.0139547	No	0	No	0	No	0	1
chr8	141531945	141532451	2037	0	+	0	No	0	No	0	No	0	0
chr8	143196559	143196761	2042	0	+	0	No	0	No	0	No	0	0
chr8	144214769	144215192	2044	0	-	0	No	0	No	0	No	0	0
chr9	1545336	1545899	2045	0	-	0	No	0	No	0	No	1	0
chr9	2564542	2564963	2046	12	-	5.62459	Yes	0	No	0	No	2	0
chr9	2975229	2975733	2047	0	-	0	No	0	No	0	No	1	0
chr9	3029839	3030370	2048	0	-	0	No	0.150059	No	0	No	1	0
chr9	4377071	4377598	2049	0	+	0	No	0	No	0	No	0	0
chr9	7442587	7443076	2050	0	-	0	No	0	No	0	No	0	0
chr9	7616093	7616560	2052	0	-	0	No	0	No	0	No	2	0
chr9	7645477	7645915	2053	5	+	0.413854	Yes	0	No	0	No	1	0
chr9	7846256	7846500	2055	0	-	0	No	0	No	0	No	0	0
chr9	7852843	7853151	2056	0	-	0	No	0	No	0	No	1	0
chr9	9206434	9206975	2057	0	+	0	No	0.150059	No	0	No	0	0
chr9	10877006	10877555	2058	1	-	0.151354	No	0	No	0	No	1	0
chr9	11361083	11361473	2059	0	+	0	No	0	No	0	No	0	0
chr9	12151952	12152501	2060	16	+	7.53016	Yes	0	No	0	No	1	1
chr9	12297547	12298015	2061	0	+	0	No	0	No	0	No	0	0
chr9	12325464	12325900	2062	0	-	0	No	0	No	0	No	1	0
chr9	12380495	12381034	2063	0	-	0	No	0	No	0	No	1	0
chr9	12416412	12416955	2064	8	-	4.48651	Yes	0	No	0	No	1	0
chr9	12756392	12756781	2065	0	+	0	No	0	No	0	No	1	0
chr9	14918032	14918478	2068	0	-	0	No	0	No	0	No	1	0
chr9	15635402	15635704	2070	0	-	0	No	0	No	0	No	1	0
chr9	16989379	16989808	2071	91	-	141.534	Yes	0	No	0	No	2	0
chr9	18292414	18292970	2072	0	+	0	No	0	No	0	No	1	0
chr9	18336988	18337494	2073	1	+	0.396134	No	0	No	0	No	2	0
chr9	19991072	19991553	2075	0	-	0	No	0	No	0	No	1	0
chr9	20017463	20017953	2076	0	-	0	No	0	No	0	No	0	0
chr9	20643718	20644241	2078	18	+	4.70974	Yes	0.215683	No	0	No	1	1
chr9	20826094	20826638	2079	0	+	0	No	0.300118	No	0	No	1	0
chr9	21406687	21407240	2080	0	-	0	No	0.089214	No	0	No	1	0
chr9	22830490	22830888	2081	0	+	0	No	0	No	0	No	1	0
chr9	24200319	24200747	2083	0	-	0	No	0	No	0	No	0	0
chr9	25438807	25439347	2085	0	-	0	No	0	No	0	No	0	0
chr9	25939805	25940193	2086	0	+	0	No	0	No	0	No	1	0
chr9	26103583	26103964	2088	0	+	0	No	0	No	0	No	0	0
chr9	26110710	26111016	2089	0	+	0	No	0	No	0	No	0	0
chr9	27790550	27791097	2091	0	+	0	No	0.089214	No	0	No	1	0
chr9	28234386	28234915	2092	0	+	0	No	0	No	0	No	1	0
chr9	28493621	28494074	2093	0	+	0	No	0.089214	No	0	No	0	0
chr9	28532963	28533491	2094	0	+	0	No	0	No	0	No	1	0
chr9	29328024	29328555	2095	0	+	0	No	0	No	0.102318	No	1	0
chr9	30026966	30027516	2096	0	-	0	No	0	No	0	No	1	0
chr9	30074115	30074630	2097	0	-	0	No	5.77288	Yes	0	No	0	0
chr9	30087120	30087664	2098	0	-	0	No	0	No	0	No	1	0
chr9	30394001	30394380	2099	0	+	0	No	0	No	0	No	1	0
chr9	30450102	30450644	2101	0	+	0	No	0	No	0	No	1	0
chr9	32144068	32144609	2102	0	+	0	No	0	No	0	No	1	0
chr9	33680744	33681143	2104	0	+	0	No	0	No	0	No	1	0
chr9	35226384	35226901	2106	0	-	0	No	0	No	0	No	0	0
chr9	39424634	39425173	2107	0	+	0	No	0	No	0	No	0	0
chr9	39647734	39648272	2108	0	+	0	No	0	No	0	No	1	0
chr9	42249499	42250037	2109	1	+	0.380887	No	0	No	0	No	0	0
chr9	42404084	42404622	2110	0	+	0	No	0	No	0	No	1	0
chr9	60983377	60983916	2111	0	+	0	No	0	No	0	No	0	0
chr9	62694164	62694702	2112	0	-	0	No	0	No	0	No	1	0
chr9	66728690	66729228	2113	0	-	0	No	0	No	0	No	1	0
chr9	66922955	66923494	2114	0	-	0	No	0	No	0	No	0	0
chr9	69362599	69363038	2115	3	+	0.0197848	No	0	No	0	No	1	0
chr9	69910299	69910825	2116	0	+	0	No	0	No	0	No	1	0
chr9	70941058	70941612	2117	0	+	0	No	0	No	0	No	0	0
chr9	73721449	73721983	2118	0	+	0	No	0	No	0	No	0	0
chr9	76524579	76525122	2119	0	-	0	No	0	No	0	No	1	0
chr9	77159729	77160116	2121	0	-	0	No	0	No	0	No	1	0
chr9	77216653	77217111	2122	0	-	0	No	0	No	0	No	1	0
chr9	77755841	77756289	2123	9	+	0.0303624	Yes	0	No	0	No	2	0
chr9	79870213	79870601	2124	0	+	0	No	0	No	0	No	1	0
chr9	80025055	80025495	2126	3	-	1.34868	No	0	No	0	No	3	0
chr9	80808500	80809051	2127	0	+	0	No	0	No	0	No	1	0
chr9	80966878	80967432	2129	0	+	0	No	0	No	0	No	0	0
chr9	81268416	81268862	2130	0	-	0	No	0	No	0	No	1	0
chr9	81271467	81271910	2131	0	-	0	No	0	No	0	No	0	0
chr9	81307624	81308172	2132	0	-	0	No	0	No	0	No	0	0
chr9	83072380	83072908	2133	0	-	0	No	0	No	0	No	0	0
chr9	84134664	84135115	2134	0	+	0	No	0	No	0	No	1	0
chr9	85370156	85370597	2135	0	-	0	No	0	No	0	No	1	0
chr9	85376552	85376998	2136	1	-	0.124027	No	0	No	0	No	1	0
chr9	93071136	93071682	2137	0	-	0	No	0	No	0	No	1	0
chr9	98433899	98434369	2138	0	+	0	No	0	No	0	No	2	0
chr9	98684931	98685473	2139	3	+	1.27518	No	0	No	0	No	1	0
chr9	100079018	100079413	2140	0	+	0	No	0	No	0	No	1	0
chr9	100803233	100803785	2142	2	-	0.29817	No	0	No	0	No	1	0
chr9	100916766	100917301	2143	0	+	0	No	0	No	0	No	1	0
chr9	102413122	102413383	2146	0	-	0	No	0	No	0	No	0	0
chr9	103393463	103394012	2148	0	-	0	No	0	No	0	No	1	0
chr9	103981972	103982422	2149	0	+	0	No	0	No	0	No	0	0
chr9	104082504	104083050	2150	0	-	0	No	0	No	0	No	1	0
chr9	104379664	104380186	2151	0	+	0	No	0	No	0	No	1	0
chr9	104444588	104445115	2152	0	+	0	No	0	No	0	No	0	0
chr9	106039420	106039967	2153	0	+	0	No	0	No	0	No	0	0
chr9	106039981	106040425	2154	0	-	0	No	0	No	0	No	0	0
chr9	106044261	106044643	2156	0	-	0	No	0	No	0	No	1	0
chr9	106109496	106110047	2157	0	+	0	No	0	No	0.102318	No	1	0
chr9	106787725	106788177	2158	2	-	0.367428	No	0	No	0.316573	No	2	0
chr9	107164513	107165029	2159	0	+	0	No	0	No	0	No	1	0
chr9	108205557	108205962	2160	0	-	0	No	0	No	0	No	2	0
chr9	110496177	110496716	2161	0	+	0	No	0	No	0	No	1	0
chr9	113210600	113211148	2162	0	+	0	No	0	No	0	No	1	0
chr9	115227259	115227808	2163	0	-	0	No	0	No	0	No	0	0
chr9	115247892	115248288	2164	1	+	0.812284	No	0	No	0	No	1	0
chr9	115346204	115346754	2166	0	+	0	No	0.089214	No	0	No	1	0
chr9	115546134	115546624	2167	0	+	0	No	0	No	0	No	1	0
chr9	118084460	118084887	2171	1	-	0.362961	No	0	No	0	No	1	0
chr9	118126049	118126595	2172	0	+	0	No	0	No	0	No	1	0
chr9	118537949	118538464	2173	0	-	0	No	0	No	0	No	2	0
chr9	118688128	118688599	2174	0	+	0	No	0	No	0	No	0	0
chr9	118697115	118697645	2175	0	-	0	No	0	No	0	No	0	0
chr9	118779814	118780362	2176	0	+	0	No	0	No	0	No	1	0
chr9	119246176	119246620	2177	1	+	0.227368	No	0	No	0	No	1	0
chr9	119413596	119414044	2178	0	+	0	No	0	No	0	No	1	0
chr9	120013311	120013855	2179	0	+	0	No	0	No	0	No	0	0
chr9	121238156	121238669	2180	0	+	0	No	0	No	0	No	1	0
chr9	134631241	134631789	2185	0	+	0	No	0	No	0	No	0	0
chr9	134928027	134928569	2186	0	+	0	No	0	No	0	No	1	0
chr9	135652488	135652754	2187	0	-	0	No	0	No	0	No	0	0
chr9	137332899	137333444	2189	0	+	0	No	0	No	0	No	0	0
chr10	99951	100387	2190	0	-	0	No	0	No	0	No	0	0
chr10	2057064	2057536	2191	0	+	0	No	0	No	0	No	1	0
chr10	2325041	2325590	2192	0	+	0	No	0	No	0	No	1	0
chr10	3321598	3322142	2193	0	+	0	No	0	No	0	No	1	0
chr10	3544848	3545396	2194	0	-	0	No	0	No	0	No	0	0
chr10	4182568	4183111	2195	0	-	0	No	0	No	0	No	0	0
chr10	4410034	4410544	2196	0	+	0	No	0	No	0	No	0	0
chr10	4879173	4879723	2197	0	-	0	No	0	No	0	No	0	0
chr10	6196325	6196827	2198	5	-	4.69024	Yes	0	No	0	No	1	0
chr10	6779419	6779969	2200	0	+	0	No	0	No	7.3995	Yes	1	0
chr10	9910440	9910988	2202	0	-	0	No	0	No	0	No	1	0
chr10	11804224	11804510	2203	0	-	0	No	0	No	0	No	0	0
chr10	14349846	14350349	2204	0	-	0	No	0	No	0	No	1	0
chr10	14376727	14377272	2205	4	+	0.429691	No	0	No	0	No	1	0
chr10	14662797	14663345	2206	0	+	0	No	0	No	0	No	1	0
chr10	14679651	14680102	2207	0	+	0	No	0.089214	No	0	No	1	0
chr10	14687896	14688439	2208	0	+	0	No	0	No	0	No	1	0
chr10	15031985	15032436	2209	0	+	0	No	0	No	0	No	0	0
chr10	15618483	15618927	2210	0	+	0	No	0	No	0	No	0	0
chr10	16188726	16189144	2211	0	+	0	No	0	No	0	No	0	0
chr10	16451044	16451399	2213	0	-	0	No	0	No	0	No	0	0
chr10	16785002	16785406	2214	1	+	0.663769	No	0	No	0	No	1	0
chr10	17800906	17801454	2216	0	-	0	No	0	No	0	No	0	0
chr10	18869820	18870325	2217	0	+	0	No	0	No	0	No	1	0
chr10	19007008	19007545	2218	0	-	0	No	0	No	0	No	1	0
chr10	20080250	20080778	2219	0	-	0	No	0	No	0	No	1	0
chr10	20476564	20476961	2220	0	+	0	No	0	No	0	No	1	0
chr10	21250097	21250552	2221	0	+	0	No	0.126469	No	0	No	1	0
chr10	22869302	22869846	2222	0	+	0	No	0	No	0	No	1	0
chr10	23056930	23057476	2223	0	-	0	No	0	No	0	No	1	0
chr10	23552106	23552634	2224	1	+	0.00584667	No	0	No	0	No	1	0
chr10	24145508	24146053	2225	0	-	0	No	0	No	0	No	1	0
chr10	25146980	25147528	2226	0	-	0	No	0	No	0	No	1	0
chr10	26382223	26382741	2228	0	-	0	No	0	No	0	No	2	0
chr10	26612552	26612980	2229	0	+	0	No	0	No	0	No	2	0
chr10	27481631	27482192	2230	1	-	0.206691	No	0	No	0	No	0	0
chr10	28780888	28781149	2231	0	-	0	No	0	No	0	No	0	0
chr10	28999369	28999815	2232	4	-	0.245994	No	0	No	0	No	2	0
chr10	29929949	29930499	2233	0	-	0	No	0	No	0.079143	No	0	0
chr10	32227571	32228142	2234	0	-	0	No	0	No	0	No	1	0
chr10	32802532	32803046	2235	1	-	0.00185115	No	0	No	0	No	1	0
chr10	36560998	36561555	2236	1	-	0.0105775	No	0	No	0	No	1	0
chr10	38668378	38668942	2237	0	-	0	No	0	No	0	No	2	0
chr10	42254131	42254640	2238	0	+	0	No	0	No	0	No	1	0
chr10	43146031	43146584	2240	0	-	0	No	0	No	0	No	0	0
chr10	43893928	43894481	2241	0	-	0	No	0	No	0	No	1	0
chr10	46746157	46746680	2242	0	-	0	No	0	No	0	No	0	0
chr10	47593745	47594268	2243	0	+	0	No	0	No	0	No	0	0
chr10	50980246	50980685	2244	0	+	0	No	0	No	0	No	2	1
chr10	52426910	52427457	2245	0	+	0	No	0	No	0	No	1	0
chr10	54105359	54105755	2247	0	-	0	No	0	No	0	No	0	0
chr10	54263743	54264265	2248	0	+	0	No	0	No	0	No	0	0
chr10	55962317	55962768	2249	3	-	0.163441	No	0	No	0	No	2	0
chr10	56509483	56509937	2250	9	+	5.32552	Yes	0	No	0	No	1	0
chr10	56595197	56595715	2251	0	-	0	No	0	No	0	No	2	0
chr10	56860568	56861014	2252	0	-	0	No	0	No	0	No	1	0
chr10	57877552	57878069	2253	0	+	0	No	0	No	0	No	1	0
chr10	59356701	59357244	2254	0	+	0	No	0	No	0	No	0	0
chr10	60014118	60014514	2256	0	-	0	No	0	No	0	No	0	0
chr10	60155552	60156097	2257	0	+	0	No	0	No	0	No	0	0
chr10	61256130	61256676	2259	0	+	0	No	0.328487	No	0.079143	No	0	0
chr10	61533986	61534502	2260	2	-	0.17134	No	0	No	0	No	1	0
chr10	61571931	61572345	2261	0	+	0	No	0.126469	No	0	No	0	0
chr10	64263362	64263881	2262	0	-	0	No	0	No	0	No	2	0
chr10	64556740	64557274	2263	0	+	0	No	0	No	0	No	1	0
chr10	65199894	65200392	2264	0	+	0	No	0.089214	No	0	No	1	0
chr10	65503562	65504007	2266	0	-	0	No	0	No	0	No	2	0
chr10	67757342	67757902	2268	1	+	0.00253275	No	0	No	0	No	1	0
chr10	71003066	71003584	2269	0	-	0	No	0	No	0	No	1	0
chr10	74659556	74659979	2270	0	-	0	No	0	No	0	No	1	0
chr10	75310988	75311440	2271	0	-	0	No	0	No	0	No	2	0
chr10	77035881	77036247	2272	0	+	0	No	0	No	0	No	1	0
chr10	78874010	78874558	2273	0	+	0	No	0	No	0	No	0	0
chr10	81204012	81204549	2274	1	+	0.00215633	No	0	No	0	No	0	0
chr10	81207200	81207748	2275	0	+	0	No	0	No	0	No	0	0
chr10	82138509	82139060	2276	1	-	0.743302	No	0	No	0	No	2	0
chr10	83010145	83010669	2277	0	-	0	No	0	No	0	No	1	0
chr10	83801042	83801570	2278	0	-	0	No	0	No	0	No	1	0
chr10	83932760	83933295	2279	0	+	0	No	0	No	0	No	1	0
chr10	84106133	84106641	2281	0	-	0	No	0	No	0	No	0	0
chr10	84324472	84325017	2282	0	+	0	No	0.089214	No	0	No	0	0
chr10	84881634	84882177	2284	0	-	0	No	0	No	0	No	0	0
chr10	84986656	84987203	2285	2	-	0.411979	No	0.126469	No	0	No	0	0
chr10	85870001	85870541	2286	0	+	0	No	0	No	0	No	1	0
chr10	87401617	87402140	2287	0	+	0	No	0	No	0	No	0	0
chr10	89105315	89105784	2288	0	-	0	No	0	No	0	No	1	0
chr10	89192166	89192414	2289	12	+	6.47438	Yes	0	No	0	No	2	0
chr10	90545632	90546075	2291	9	+	2.86736	Yes	0	No	0	No	1	0
chr10	90551641	90552063	2292	12	+	2.90086	Yes	0	No	0	No	2	0
chr10	90632625	90633172	2293	0	-	0	No	0	No	0	No	0	0
chr10	90793601	90794129	2294	0	-	0	No	0	No	0	No	1	0
chr10	91772109	91772556	2295	15	+	9.93592	Yes	0	No	0	No	1	0
chr10	94650531	94650935	2296	0	+	0	No	0	No	0	No	0	1
chr10	105360174	105360712	2298	0	+	0	No	0	No	0	No	1	0
chr10	105482551	105483002	2299	1	+	0.0763862	No	0	No	0	No	2	0
chr10	106550487	106551037	2300	0	-	0	No	0	No	0	No	0	0
chr10	107105319	107105864	2301	0	-	0	No	0	No	0	No	0	0
chr10	107578494	107578947	2302	8	+	3.8151	Yes	0	No	0	No	1	1
chr10	109161523	109161740	2305	0	+	0	No	0	No	0	No	0	0
chr10	109719898	109720439	2306	0	+	0	No	0.178428	No	0	No	1	0
chr10	110610744	110611275	2307	11	-	7.32765	Yes	0	No	0	No	1	0
chr10	111430173	111430684	2308	0	+	0	No	0.557835	No	0	No	2	0
chr10	112076587	112077087	2311	0	+	0	No	0	No	0	No	0	0
chr10	114105608	114106100	2313	1	+	0.000306425	No	0	No	0	No	1	0
chr10	114933824	114934362	2314	0	-	0	No	0	No	0	No	0	0
chr10	117590626	117591176	2315	0	-	0	No	0	No	0	No	1	0
chr10	117629633	117630164	2316	0	-	0	No	0	No	0	No	1	0
chr10	117981510	117981912	2317	0	+	0	No	0	No	0	No	1	0
chr10	118540964	118541407	2318	1	+	0.96388	No	0	No	0	No	2	0
chr10	118671032	118671580	2320	0	-	0	No	0	No	0	No	0	0
chr10	119844573	119845086	2321	1	+	1.44864	No	0	No	0	No	0	0
chr10	120482908	120483417	2322	0	+	0	No	0	No	0	No	0	0
chr10	120545730	120546277	2323	0	+	0	No	0	No	0	No	1	0
chr10	122907324	122907847	2324	0	+	0	No	0	No	0	No	1	0
chr10	123564888	123565407	2325	0	-	0	No	0	No	0	No	1	0
chr10	123657989	123658536	2326	0	-	0	No	0	No	0	No	0	0
chr10	124596791	124597332	2327	0	+	0	No	0	No	0	No	1	0
chr10	125254035	125254430	2328	0	-	0	No	0	No	0	No	1	0
chr10	125778775	125779194	2330	0	-	0	No	0	No	0	No	1	0
chr10	126149436	126149984	2331	0	+	0	No	0	No	0	No	1	0
chr10	126377221	126377654	2332	0	-	0	No	0.215683	No	0	No	1	0
chr10	129200184	129200716	2333	0	-	0	No	0	No	0	No	1	0
chr10	129435582	129436021	2334	1	-	0.000177743	No	0	No	0	No	1	0
chr10	130062256	130062791	2335	0	+	0	No	0	No	0	No	0	0
chr10	130246358	130246865	2336	0	-	0	No	0	No	0	No	1	0
chr10	130523401	130523947	2337	0	+	0	No	0	No	0	No	1	0
chr10	130938915	130939450	2338	0	-	0	No	0	No	0	No	1	0
chr10	131008708	131009218	2339	0	-	0	No	0	No	0	No	1	0
chr10	131474541	131475055	2340	0	-	0	No	0	No	0	No	1	0
chr11	4526891	4527400	2342	0	+	0	No	0	No	0	No	1	0
chr11	5348652	5348858	2343	0	-	0	No	0	No	0	No	1	0
chr11	6958569	6959097	2344	2	-	0.558002	No	0	No	0	No	2	0
chr11	7550639	7551093	2345	0	+	0	No	0	No	0	No	1	0
chr11	7750030	7750534	2346	0	+	0	No	0	No	0	No	0	0
chr11	11217308	11217850	2348	0	-	0	No	0	No	0	No	1	0
chr11	11507661	11507999	2349	0	+	0	No	0.126469	No	0	No	1	0
chr11	11748931	11749313	2350	0	-	0	No	0	No	0	No	0	0
chr11	12450521	12451065	2351	0	-	0	No	0	No	0	No	0	0
chr11	15377088	15377553	2352	0	+	0	No	0	No	0	No	0	0
chr11	15474412	15474981	2353	0	-	0	No	0	No	0	No	0	0
chr11	15868291	15868850	2354	0	-	0	No	0	No	0	No	1	0
chr11	18208547	18209059	2355	0	+	0	No	0	No	0	No	0	0
chr11	18454246	18454703	2356	2	-	0.139975	No	0	No	0	No	1	0
chr11	18459069	18459609	2357	0	+	0	No	0	No	0	No	1	0
chr11	20566294	20566557	2358	3	+	1.25587	No	0	No	0	No	0	0
chr11	20572911	20573226	2361	6	-	1.4987	Yes	0	No	0	No	1	0
chr11	21157868	21158398	2362	0	+	0	No	0	No	0	No	0	0
chr11	21527506	21528056	2363	0	-	0	No	0	No	0	No	0	0
chr11	22065142	22065394	2364	0	+	0	No	0	No	0	No	1	0
chr11	22392078	22392620	2366	0	+	0	No	0	No	0	No	0	0
chr11	22590694	22591239	2367	0	-	0	No	0	No	0	No	1	0
chr11	22986503	22986931	2369	0	-	0	No	0	No	0	No	1	0
chr11	23162560	23162779	2370	0	+	0	No	0	No	0	No	0	0
chr11	24037361	24037801	2373	0	+	0	No	0	No	0	No	2	0
chr11	24340988	24341535	2374	0	-	0	No	0	No	0	No	0	0
chr11	25164164	25164588	2375	0	-	0	No	0	No	0	No	2	0
chr11	25494459	25494974	2376	0	-	0	No	0	No	0	No	1	0
chr11	25801336	25801868	2377	0	-	0	No	0	No	0	No	0	0
chr11	26280295	26280741	2380	0	-	0	No	0	No	0	No	1	0
chr11	26341564	26342094	2381	0	-	0	No	0	No	0	No	0	0
chr11	26773685	26774227	2382	0	-	0	No	0	No	0	No	0	0
chr11	27245882	27246303	2383	0	-	0	No	0	No	0	No	1	0
chr11	27767704	27767984	2384	0	-	0	No	0	No	0	No	0	0
chr11	28436778	28437335	2387	0	+	0	No	0	No	0	No	1	0
chr11	28989062	28989601	2388	2	+	0.153467	No	0	No	0	No	2	0
chr11	29491231	29491666	2389	0	+	0	No	0	No	0	No	0	0
chr11	30242652	30243207	2390	0	+	0	No	0	No	0	No	1	0
chr11	31996693	31997206	2392	0	-	0	No	0	No	0	No	0	0
chr11	32080814	32081195	2393	0	+	0	No	0	No	0	No	0	0
chr11	35911131	35911576	2395	0	-	0	No	0	No	0	No	2	0
chr11	36661215	36661756	2396	0	-	0	No	0	No	0	No	0	0
chr11	37141673	37142089	2397	0	+	0	No	0	No	0	No	0	0
chr11	37347276	37347695	2398	0	+	0	No	0	No	0	No	0	0
chr11	38353065	38353603	2399	0	+	0	No	0	No	0	No	0	0
chr11	38399734	38400178	2400	0	+	0	No	0	No	0	No	0	0
chr11	38431190	38431544	2402	0	+	0	No	0	No	0	No	0	0
chr11	38498802	38499310	2403	1	+	0.552947	No	0	No	0.237429	No	1	0
chr11	38627314	38627724	2404	1	+	0.00116346	No	0	No	0	No	0	0
chr11	38690288	38690841	2406	0	+	0	No	0	No	0	No	2	0
chr11	38923165	38923755	2407	0	-	0	No	0	No	0.120817	No	1	0
chr11	39070475	39070917	2408	8	-	0.713349	Yes	0	No	0	No	2	0
chr11	39083464	39084015	2409	0	-	0	No	0	No	0	No	1	0
chr11	41325983	41326526	2411	0	+	0	No	0.150059	No	0	No	1	0
chr11	41433414	41433891	2412	0	+	0	No	0	No	0	No	1	0
chr11	41718652	41719204	2413	0	+	0	No	0.126469	No	0	No	1	0
chr11	42400838	42401382	2414	0	+	0	No	0	No	0.079143	No	0	0
chr11	43061627	43062076	2415	0	-	0	No	0	No	0	No	0	0
chr11	43186641	43187090	2416	0	-	0	No	0.126469	No	0	No	1	0
chr11	45676193	45676731	2417	1	+	0.000919276	No	0	No	0	No	2	0
chr11	55776348	55776737	2418	0	+	0	No	0	No	0	No	0	0
chr11	56039238	56039626	2420	0	+	0	No	0	No	0	No	0	0
chr11	56153117	56153657	2422	0	+	0	No	0	No	0.079143	No	1	0
chr11	56537072	56537563	2423	0	-	0	No	0	No	0	No	2	0
chr11	57651453	57651896	2424	0	+	0	No	0	No	0	No	2	0
chr11	58469419	58469953	2425	0	-	0	No	0	No	0	No	0	0
chr11	58479294	58479840	2426	1	-	0.00218292	No	0	No	0	No	0	1
chr11	60118938	60119472	2427	0	-	0	No	0	No	0	No	1	0
chr11	60216679	60216895	2428	0	+	0	No	0	No	0	No	1	0
chr11	60223500	60223953	2430	0	+	0	No	0	No	0	No	1	0
chr11	60639689	60640108	2431	0	+	0	No	0	No	0	No	0	0
chr11	63410888	63411436	2433	0	-	0	No	0	No	0	No	1	0
chr11	65735206	65735708	2434	0	+	0	No	0	No	0	No	0	0
chr11	70146514	70147074	2435	0	-	0	No	0	No	0	No	1	0
chr11	73484757	73485132	2438	0	-	0	No	0	No	0	No	1	0
chr11	78615123	78615667	2439	0	-	0	No	0	No	0	No	0	0
chr11	81797068	81797515	2440	0	-	0	No	0	No	0	No	1	0
chr11	81947029	81947588	2441	0	+	0	No	0	No	0	No	1	0
chr11	82634856	82635299	2443	0	+	0	No	0	No	0	No	2	0
chr11	83955664	83956088	2447	0	+	0	No	0	No	0	No	0	0
chr11	84761378	84761907	2448	0	+	0	No	0	No	0	No	1	0
chr11	87529287	87529721	2450	0	+	0	No	0	No	0	No	0	0
chr11	88035393	88035637	2451	0	-	0	No	0	No	0	No	0	0
chr11	90660559	90661011	2453	1	-	0.002072	No	0	No	0	No	2	0
chr11	90718603	90719139	2454	0	+	0	No	0	No	0	No	1	0
chr11	91596668	91597117	2455	0	+	0	No	0	No	0	No	1	0
chr11	91602902	91603352	2457	0	+	0	No	0	No	0	No	1	0
chr11	91814746	91815114	2458	0	+	0	No	0	No	0	No	0	0
chr11	93039584	93040133	2460	0	+	0	No	0	No	0	No	0	0
chr11	93771307	93771845	2461	0	+	0	No	0.089214	No	0	No	1	0
chr11	96270758	96271305	2462	1	+	0.328753	No	0	No	0	No	0	0
chr11	97850745	97851280	2463	0	+	0	No	0	No	0	No	0	0
chr11	97878141	97878402	2465	0	-	0	No	0	No	0	No	0	0
chr11	98040984	98041207	2466	0	-	0	No	0	No	0	No	0	0
chr11	98041471	98041845	2467	0	-	0	No	0	No	0	No	1	0
chr11	98485699	98486222	2471	0	+	0	No	0	No	0	No	0	0
chr11	98726662	98727196	2472	0	-	0	No	0	No	0	No	1	0
chr11	99887457	99888012	2475	0	-	0	No	0	No	0	No	0	0
chr11	100021628	100022193	2476	0	-	0	No	0	No	0	No	0	0
chr11	101154665	101155096	2477	3	-	1.0407	No	0.089214	No	0	No	1	0
chr11	101629096	101629519	2479	0	-	0	No	0	No	0	No	1	0
chr11	101788958	101789509	2480	0	-	0	No	0	No	0	No	1	0
chr11	104064866	104065307	2481	0	+	0	No	0	No	0	No	2	0
chr11	104220137	104220677	2482	0	+	0	No	0	No	0	No	2	0
chr11	104308850	104309298	2483	1	+	0.0170416	No	0	No	0	No	0	0
chr11	105257919	105258467	2484	0	+	0	No	0	No	0	No	0	0
chr11	105498689	105499240	2485	1	-	0.170416	No	0	No	0	No	1	1
chr11	106117525	106118062	2486	0	+	0	No	0.126469	No	0	No	0	0
chr11	106171671	106172188	2487	0	+	0	No	0	No	0	No	0	0
chr11	106637424	106637814	2488	0	+	0	No	0	No	0	No	1	0
chr11	106702872	106703322	2490	3	+	0.422277	No	0	No	0	No	2	0
chr11	106807594	106808146	2491	0	+	0	No	0	No	0	No	0	0
chr11	106830355	106830803	2493	0	+	0	No	0	No	0	No	1	0
chr11	107390750	107391278	2494	0	+	0	No	0	No	0	No	0	0
chr11	107473201	107473744	2495	0	-	0	No	0.089214	No	0	No	1	0
chr11	109288308	109288840	2496	0	+	0	No	0	No	0	No	1	0
chr11	109961537	109962086	2497	0	+	0	No	0	No	0	No	1	0
chr11	109967674	109968249	2498	0	+	0	No	0	No	0	No	1	0
chr11	110944300	110944769	2499	4	-	0.0208928	No	0	No	0	No	0	0
chr11	117957479	117958025	2501	0	-	0	No	0	No	0	No	0	0
[truncated: 1,071 more rows]

## Sheet: S3
Supplemental Table S3. List of FANTOM5 sample IDs with brief names for the data used in this study.
ID	Sample name
CNhs10608	Clontech Human Universal Reference Total RNA, pool1
CNhs10610	SABiosciences XpressRef Human Universal Total RNA, pool1
CNhs10612	Universal RNA - Human Normal Tissues Biochain, pool1
CNhs10615	adipose tissue, adult, pool1
CNhs10616	bladder, adult, pool1
CNhs10617	brain, adult, pool1
CNhs10618	cervix, adult, pool1
CNhs10619	colon, adult, pool1
CNhs10620	esophagus, adult, pool1
CNhs10621	heart, adult, pool1
CNhs10622	kidney, adult, pool1
CNhs10624	liver, adult, pool1
CNhs10625	lung, adult, pool1
CNhs10626	ovary, adult, pool1
CNhs10627	placenta, adult, pool1
CNhs10628	prostate, adult, pool1
CNhs10629	skeletal muscle, adult, pool1
CNhs10630	small intestine, adult, pool1
CNhs10631	spleen, adult, pool1
CNhs10632	testis, adult, pool1
CNhs10633	thymus, adult, pool1
CNhs10634	thyroid, adult, pool1
CNhs10635	trachea, adult, pool1
CNhs10636	retina, adult, pool1
CNhs10637	temporal lobe, adult, pool1
CNhs10638	postcentral gyrus, adult, pool1
CNhs10640	pons, adult, pool1
CNhs10641	parietal lobe, adult, pool1
CNhs10642	paracentral gyrus, adult, pool1
CNhs10643	occipital pole, adult, pool1
CNhs10644	nucleus accumbens, adult, pool1
CNhs10645	medulla oblongata, adult, pool1
CNhs10646	insula, adult, pool1
CNhs10647	frontal lobe, adult, pool1
CNhs10648	dura mater, adult, donor1
CNhs10649	corpus callosum, adult, pool1
CNhs10650	thymus, fetal, pool1
CNhs10651	spleen, fetal, pool1
CNhs10652	kidney, fetal, pool1
CNhs10653	heart, fetal, pool1
CNhs10654	tonsil, adult, pool1
CNhs10837	Endothelial Cells - Aortic, donor0
CNhs10838	Smooth Muscle Cells - Aortic, donor0
CNhs10839	Smooth Muscle Cells - Umbilical artery, donor0
CNhs10842	Retinal Pigment Epithelial Cells, donor0
CNhs10843	Urothelial cells, donor0
CNhs10844	Mesenchymal stem cells - adipose, donor0
CNhs10845	Mesenchymal stem cells - hepatic, donor0
CNhs10846	Mesenchymal Stem Cells - Vertebral, donor1
CNhs10847	Sebocyte, donor1
CNhs10850	Mesothelial Cells, donor1
CNhs10852	CD14+ Monocytes, donor1
CNhs10853	CD4+ T Cells, donor1
CNhs10854	CD8+ T Cells, donor1
CNhs10855	Dendritic Cells - monocyte immature derived, donor1, tech_rep1
CNhs10857	Dendritic Cells - plasmacytoid, donor1
CNhs10858	CD14+ monocyte derived endothelial progenitor cells, donor1
CNhs10859	Natural Killer Cells, donor1
CNhs10860	Peripheral Blood Mononuclear Cells, donor1
CNhs10861	Macrophage - monocyte derived, donor1
CNhs10862	Neutrophils, donor1
CNhs10863	Smooth Muscle Cells - Brain Vascular, donor1
CNhs10864	Astrocyte - cerebral cortex, donor1
CNhs10865	Endothelial Cells - Lymphatic, donor1
CNhs10866	Fibroblast - Gingival, donor1
CNhs10867	Fibroblast - Periodontal Ligament, donor1
CNhs10868	Smooth Muscle Cells - Colonic, donor1
CNhs10869	Skeletal Muscle Satellite Cells, donor1
CNhs10870	Myoblast, donor1
CNhs10871	Ciliary Epithelial Cells, donor1
CNhs10872	Endothelial Cells - Umbilical vein, donor1
CNhs10874	Fibroblast - Aortic Adventitial, donor1
CNhs10875	Intestinal epithelial cells (polarized), donor1
CNhs10876	Anulus Pulposus Cell, donor1
CNhs10877	Pancreatic stromal cells, donor1
CNhs10878	Fibroblast - Pulmonary Artery, donor1
CNhs10879	Keratinocyte - oral, donor1
CNhs10881	Nucleus Pulposus Cell, donor1
CNhs10882	Prostate Epithelial Cells (polarized), donor1
CNhs10883	Prostate Stromal Cells, donor1
CNhs10884	Small Airway Epithelial Cells, donor1
CNhs11051	Adipocyte - breast, donor1
CNhs11052	Preadipocyte - breast, donor1
CNhs11054	Adipocyte - omental, donor1
CNhs11057	Mesenchymal Stem Cells - Wharton's Jelly, donor1
CNhs11061	Gingival epithelial cells, donor1 (GEA11)
CNhs11062	Dendritic Cells - monocyte immature derived, donor1, tech_rep2
CNhs11063	Neural stem cells, donor1
CNhs11064	Keratinocyte - epidermal, donor1
CNhs11065	Preadipocyte - omental, donor1
CNhs11067	Smooth Muscle Cells - Internal Thoracic Artery, donor1
CNhs11068	Synoviocyte, donor1
CNhs11073	Mast cell - stimulated, donor1
CNhs11074	Fibroblast - skin spinal muscular atrophy, donor1
CNhs11075	Whole blood (ribopure), donor090325, donation1
CNhs11076	Whole blood (ribopure), donor090325, donation2
CNhs11077	Mammary Epithelial Cell, donor1
CNhs11078	Osteoblast, donor1
CNhs11079	Placental Epithelial Cells, donor1
CNhs11081	Preadipocyte - subcutaneous, donor1
CNhs11082	Preadipocyte - visceral, donor1
CNhs11083	Skeletal Muscle Cells, donor1
CNhs11084	Skeletal muscle cells differentiated into Myotubes - multinucleated, donor1
CNhs11085	Smooth Muscle Cells - Aortic, donor1
CNhs11086	Smooth Muscle Cells - Brachiocephalic, donor1
CNhs11087	Smooth Muscle Cells - Carotid, donor1
CNhs11088	Smooth Muscle Cells - Coronary Artery, donor1
CNhs11089	Smooth Muscle Cells - Pulmonary Artery, donor1
CNhs11090	Smooth Muscle Cells - Subclavian Artery, donor1
CNhs11091	Smooth Muscle Cells - Umbilical Artery, donor1
CNhs11092	Tracheal Epithelial Cells, donor1
CNhs11303	Melanocyte - light, donor1
CNhs11305	Smooth Muscle Cells - Aortic, donor2
CNhs11311	Osteoblast - differentiated, donor1
CNhs11316	Mesenchymal Stem Cells - bone marrow, donor4
CNhs11317	Pericytes, donor1
CNhs11319	Fibroblast - Choroid Plexus, donor1
CNhs11320	Meningeal Cells, donor1
CNhs11321	Astrocyte - cerebellum, donor1
CNhs11322	Fibroblast - Lymphatic, donor1
CNhs11323	Esophageal Epithelial Cells, donor1
CNhs11324	Smooth Muscle Cells - Esophageal, donor1
CNhs11325	Alveolar Epithelial Cells, donor1
CNhs11327	Bronchial Epithelial Cell, donor1
CNhs11328	Smooth Muscle Cells - Bronchial, donor1
CNhs11329	Smooth Muscle Cells - Tracheal, donor1
CNhs11330	Renal Proximal Tubular Epithelial Cell, donor1
CNhs11331	Renal Cortical Epithelial Cells, donor1
CNhs11332	Renal Epithelial Cells, donor1
CNhs11333	Renal Mesangial Cells, donor1
CNhs11334	Urothelial Cells, donor1
CNhs11335	Hepatic Stellate Cells (lipocyte), donor1
CNhs11336	Corneal Epithelial Cells, donor1
CNhs11337	Keratocytes, donor1
CNhs11338	Retinal Pigment Epithelial Cells, donor1
CNhs11339	Fibroblast - Conjunctival, donor1
CNhs11340	Trabecular Meshwork Cells, donor1
CNhs11341	Amniotic Epithelial Cells, donor1
CNhs11343	Fibroblast - Villous Mesenchymal, donor1
CNhs11344	Mesenchymal Stem Cells - bone marrow, donor1
CNhs11346	Mesenchymal Stem Cells - hepatic, donor1
CNhs11347	Mesenchymal Stem Cells - umbilical, donor1
CNhs11348	Fibroblast - Mammary, donor1
CNhs11349	Mesenchymal Stem Cells - amniotic membrane, donor1
CNhs11350	Multipotent Cord Blood Unrestricted Somatic Stem Cells, donor1
CNhs11351	Fibroblast - skin normal, donor1
CNhs11352	Fibroblast - skin walker warburg, donor1
CNhs11353	Fibroblast - skin dystrophia myotonica, donor1
CNhs11354	Fibroblast - skin dystrophia myotonica, donor2
CNhs11371	Adipocyte - subcutaneous, donor2
CNhs11372	Chondrocyte - de diff, donor2
CNhs11373	Chondrocyte - re diff, donor2
CNhs11375	Endothelial Cells - Aortic, donor2
CNhs11376	Endothelial Cells - Microvascular, donor2
CNhs11379	Fibroblast - Dermal, donor2
CNhs11380	Fibroblast - Lung, donor2
CNhs11382	Mammary Epithelial Cell, donor2
CNhs11384	Neural stem cells, donor2
CNhs11385	Osteoblast, donor2
CNhs11671	Whole blood (ribopure), donor090309, donation2
CNhs11672	Whole blood (ribopure), donor090612, donation1
CNhs11673	Whole blood (ribopure), donor090612, donation2
CNhs11675	Whole blood (ribopure), donor090309, donation1
CNhs11676	uterus, adult, pool1
CNhs11677	salivary gland, adult, pool1
CNhs11680	lung, fetal, donor1
CNhs11755	smooth muscle, adult, pool1
CNhs11756	pancreas, adult, donor1
CNhs11757	heart, adult, diseased post-infarction, donor1
CNhs11758	heart, adult, diseased, donor1
CNhs11760	aorta, adult, pool1
CNhs11762	eye, fetal, donor1
CNhs11763	uterus, fetal, donor1
CNhs11764	spinal cord, fetal, donor1
CNhs11766	trachea, fetal, donor1
CNhs11768	tongue, fetal, donor1
CNhs11769	thyroid, fetal, donor1
CNhs11770	throat, fetal, donor1
CNhs11771	stomach, fetal, donor1
CNhs11772	temporal lobe, fetal, donor1, tech_rep1
CNhs11773	small intestine, fetal, donor1
CNhs11774	skin, fetal, donor1
CNhs11776	skeletal muscle, fetal, donor1
CNhs11777	rectum, fetal, donor1
CNhs11779	diaphragm, fetal, donor1
CNhs11780	colon, fetal, donor1
CNhs11781	duodenum, fetal, donor1, tech_rep1
CNhs11782	parietal lobe, fetal, donor1
CNhs11784	occipital lobe, fetal, donor1
CNhs11786	lung, right lower lobe, adult, donor1
CNhs11787	occipital lobe, adult, donor1
CNhs11788	lymph node, adult, donor1
CNhs11789	left ventricle, adult, donor1
CNhs11790	left atrium, adult, donor1
CNhs11792	breast, adult, donor1
CNhs11794	colon, adult, donor1
CNhs11795	cerebellum, adult, pool1
CNhs11796	brain, adult, donor1
CNhs11798	liver, fetal, pool1
CNhs11896	Gingival epithelial cells, donor2 (GEA14)
CNhs11897	CD14+ monocyte derived endothelial progenitor cells, donor2
CNhs11899	Macrophage - monocyte derived, donor2
CNhs11900	Smooth Muscle Cells - Brain Vascular, donor2
CNhs11901	Endothelial Cells - Lymphatic, donor2
CNhs11902	Preadipocyte - omental, donor2
CNhs11903	Gingival epithelial cells, donor3 (GEA15)
CNhs11904	CD14+ monocyte derived endothelial progenitor cells, donor3
CNhs11905	Neutrophils, donor3
CNhs11906	Endothelial Cells - Lymphatic, donor3
CNhs11907	Fibroblast - Periodontal Ligament, donor3
CNhs11908	Myoblast, donor3
CNhs11909	Fibroblast - Cardiac, donor4
CNhs11910	Smooth Muscle Cells - Prostate, donor3
CNhs11911	Fibroblast - skin spinal muscular atrophy, donor2
CNhs11912	Fibroblast - skin spinal muscular atrophy, donor3
CNhs11913	Fibroblast - skin dystrophia myotonica, donor3
CNhs11914	Fibroblast - skin normal, donor2
CNhs11920	Smooth Muscle Cells - Prostate, donor1
CNhs11921	Smooth Muscle Cells - Uterine, donor1
CNhs11923	Chondrocyte - de diff, donor1
CNhs11925	Endothelial Cells - Microvascular, donor1
CNhs11926	Endothelial Cells - Thoracic, donor1
CNhs11927	Smooth Muscle Cells - Uterine, donor3
CNhs11936	Lymphatic Endothelial cells response to VEGFC, 00hr00min, biol_rep1 (MM XIX - 1)
CNhs11948	Whole blood (ribopure), donor090309, donation3
CNhs11949	Whole blood (ribopure), donor090612, donation3
CNhs11951	Sebocyte, donor2
CNhs11952	Fibroblast - Gingival, donor5 (GFH3)
CNhs11953	Fibroblast - Periodontal Ligament, donor5 (PL30)
CNhs11954	CD14+ Monocytes, donor2
CNhs11955	CD4+ T Cells, donor2
CNhs11956	CD8+ T Cells, donor2
CNhs11957	Natural Killer Cells, donor2
CNhs11958	Peripheral Blood Mononuclear Cells, donor2
CNhs11959	Neutrophils, donor2
CNhs11960	Astrocyte - cerebral cortex, donor2
CNhs11961	Fibroblast - Gingival, donor2
CNhs11962	Fibroblast - Periodontal Ligament, donor2
CNhs11963	Smooth Muscle Cells - Colonic, donor2
CNhs11964	Skeletal Muscle Satellite Cells, donor2
CNhs11965	Myoblast, donor2
CNhs11966	Ciliary Epithelial Cells, donor2
CNhs11967	Endothelial Cells - Umbilical vein, donor2
CNhs11968	Fibroblast - Aortic Adventitial, donor2
CNhs11969	Adipocyte - breast, donor2
CNhs11971	Preadipocyte - breast, donor2
CNhs11972	Prostate Epithelial Cells, donor2
CNhs11973	Prostate Stromal Cells, donor2
CNhs11975	Small Airway Epithelial Cells, donor2
CNhs11976	Smooth Muscle Cells - Prostate, donor2
CNhs11977	Endothelial Cells - Artery, donor2
CNhs11978	Endothelial Cells - Thoracic, donor2
CNhs11979	Hair Follicle Dermal Papilla Cells, donor2
CNhs11981	Preadipocyte - subcutaneous, donor2
CNhs11982	Preadipocyte - visceral, donor2
CNhs11984	Skeletal muscle cells differentiated into Myotubes - multinucleated, donor2
CNhs11985	Smooth Muscle Cells - Brachiocephalic, donor2
CNhs11988	Smooth Muscle Cells - Internal Thoracic Artery, donor2
CNhs11990	Smooth Muscle Cells - Subclavian Artery, donor2
CNhs11991	Smooth Muscle Cells - Umbilical Artery, donor2
CNhs11992	Synoviocyte, donor2
CNhs11993	Tracheal Epithelial Cells, donor2
CNhs11995	Sebocyte, donor3
CNhs11996	Fibroblast - Periodontal Ligament, donor6 (PLH3)
CNhs11997	CD14+ Monocytes, donor3
CNhs11998	CD4+ T Cells, donor3
CNhs11999	CD8+ T Cells, donor3
CNhs12000	Dendritic Cells - monocyte immature derived, donor3
CNhs12001	Natural Killer Cells, donor3
CNhs12002	Peripheral Blood Mononuclear Cells, donor3
CNhs12003	Macrophage - monocyte derived, donor3
CNhs12004	Smooth Muscle Cells - Brain Vascular, donor3
CNhs12005	Astrocyte - cerebral cortex, donor3
CNhs12006	Fibroblast - Gingival, donor3
CNhs12007	Smooth Muscle Cells - Colonic, donor3
CNhs12008	Skeletal Muscle Satellite Cells, donor3
CNhs12009	Ciliary Epithelial Cells, donor3
CNhs12010	Endothelial Cells - Umbilical vein, donor3
CNhs12011	Fibroblast - Aortic Adventitial, donor3
CNhs12012	Mesothelial Cells, donor3
CNhs12013	Preadipocyte - omental, donor3
CNhs12014	Prostate Epithelial Cells, donor3
CNhs12015	Prostate Stromal Cells, donor3
CNhs12016	Small Airway Epithelial Cells, donor3
CNhs12017	Adipocyte - subcutaneous, donor3
CNhs12019	Nucleus Pulposus Cell, donor2
CNhs12020	Chondrocyte - de diff, donor3
CNhs12021	Chondrocyte - re diff, donor3
CNhs12022	Endothelial Cells - Aortic, donor3
CNhs12023	Endothelial Cells - Artery, donor3
CNhs12024	Endothelial Cells - Microvascular, donor3
CNhs12026	Endothelial Cells - Vein, donor3
CNhs12027	Fibroblast - Cardiac, donor3
CNhs12028	Fibroblast - Dermal, donor3
CNhs12029	Fibroblast - Lung, donor3
CNhs12031	Keratinocyte - epidermal, donor3
CNhs12032	Mammary Epithelial Cell, donor3
CNhs12035	Osteoblast - differentiated, donor3
CNhs12036	Osteoblast, donor3
CNhs12037	Placental Epithelial Cells, donor3
CNhs12038	Preadipocyte - subcutaneous, donor3
CNhs12039	Preadipocyte - visceral, donor3
CNhs12040	Skeletal Muscle Cells, donor3
CNhs12041	Skeletal muscle cells differentiated into Myotubes - multinucleated, donor3
CNhs12043	Smooth Muscle Cells - Brachiocephalic, donor3
CNhs12044	Smooth Muscle Cells - Carotid, donor3
CNhs12045	Smooth Muscle Cells - Coronary Artery, donor3
CNhs12046	Smooth Muscle Cells - Internal Thoracic Artery, donor3
CNhs12047	Smooth Muscle Cells - Pulmonary Artery, donor3
CNhs12048	Smooth Muscle Cells - Subclavian Artery, donor3
CNhs12049	Smooth Muscle Cells - Umbilical Artery, donor3
CNhs12050	Synoviocyte, donor3
CNhs12051	Tracheal Epithelial Cells, donor3
CNhs12052	Fibroblast - Dermal, donor4
CNhs12053	Skeletal Muscle Cells, donor4
CNhs12054	Bronchial Epithelial Cell, donor4
CNhs12055	Fibroblast - Dermal, donor5
CNhs12056	Skeletal Muscle Cells, donor5
CNhs12057	Fibroblast - Cardiac, donor5
CNhs12058	Bronchial Epithelial Cell, donor5
CNhs12059	Fibroblast - Dermal, donor6
CNhs12060	Skeletal Muscle Cells, donor6
CNhs12061	Fibroblast - Cardiac, donor6
CNhs12062	Bronchial Epithelial Cell, donor6
CNhs12063	Nucleus Pulposus Cell, donor3
CNhs12064	Anulus Pulposus Cell, donor2
CNhs12067	Adipocyte - omental, donor2
CNhs12068	Adipocyte - omental, donor3
CNhs12069	Adipocyte - perirenal, donor1
CNhs12073	Schwann Cells, donor1
CNhs12075	Hepatic Sinusoidal Endothelial Cells, donor1
CNhs12079	Pericytes, donor2
CNhs12080	Meningeal Cells, donor2
CNhs12081	Astrocyte - cerebellum, donor2
CNhs12084	Alveolar Epithelial Cells, donor2
CNhs12085	Bronchial Epithelial Cell, donor2
CNhs12086	Renal Glomerular Endothelial Cells, donor2
CNhs12087	Renal Proximal Tubular Epithelial Cell, donor2
CNhs12089	Renal Mesangial Cells, donor2
CNhs12091	Urothelial Cells, donor2
CNhs12092	Hepatic Sinusoidal Endothelial Cells, donor2
CNhs12104	Mesenchymal Stem Cells - amniotic membrane, donor2
CNhs12105	Multipotent Cord Blood Unrestricted Somatic Stem Cells, donor2
CNhs12116	Pericytes, donor3
CNhs12117	Astrocyte - cerebellum, donor3
CNhs12118	Fibroblast - Lymphatic, donor3
CNhs12120	Renal Proximal Tubular Epithelial Cell, donor3
CNhs12121	Renal Mesangial Cells, donor3
CNhs12122	Urothelial Cells, donor3
CNhs12123	Corneal Epithelial Cells, donor3
CNhs12124	Trabecular Meshwork Cells, donor3
CNhs12125	Amniotic Epithelial Cells, donor3
CNhs12126	Mesenchymal Stem Cells - bone marrow, donor3
CNhs12127	Mesenchymal Stem Cells - umbilical, donor3
CNhs12175	CD19+ B Cells (pluriselect), donor090325, donation2
CNhs12176	CD8+ T Cells (pluriselect), donor090309, donation1
CNhs12178	CD8+ T Cells (pluriselect), donor090309, donation2
CNhs12179	CD19+ B Cells (pluriselect), donor090309, donation2
CNhs12180	CD8+ T Cells (pluriselect), donor090309, donation3
CNhs12181	CD19+ B Cells (pluriselect), donor090309, donation3
CNhs12182	CD8+ T Cells (pluriselect), donor090612, donation1
CNhs12183	CD19+ B Cells (pluriselect), donor090612, donation1
CNhs12184	CD8+ T Cells (pluriselect), donor090612, donation2
CNhs12185	CD19+ B Cells (pluriselect), donor090612, donation2
CNhs12187	CD8+ T Cells (pluriselect), donor090612, donation3
CNhs12188	CD19+ B Cells (pluriselect), donor090612, donation3
CNhs12196	Dendritic Cells - plasmacytoid, donor2
CNhs12197	Mesothelial Cells, donor2
CNhs12199	CD8+ T Cells (pluriselect), donor090325, donation2
CNhs12200	Dendritic Cells - plasmacytoid, donor3
CNhs12201	CD8+ T Cells (pluriselect), donor090325, donation1
CNhs12205	CD34+ Progenitors, donor2
CNhs12227	spinal cord, adult, donor10252
CNhs12228	pineal gland, adult, donor10252
CNhs12229	pituitary gland, adult, donor10252
CNhs12310	medial frontal gyrus, adult, donor10252
CNhs12311	amygdala, adult, donor10252
CNhs12312	hippocampus, adult, donor10252
CNhs12314	thalamus, adult, donor10252
CNhs12315	medulla oblongata, adult, donor10252
CNhs12316	medial temporal gyrus, adult, donor10252
CNhs12317	parietal lobe, adult, donor10252
CNhs12318	substantia nigra, adult, donor10252
CNhs12319	globus pallidus, adult, donor10252
CNhs12320	occipital cortex, adult, donor10252
CNhs12321	caudate nucleus, adult, donor10252
CNhs12322	locus coeruleus, adult, donor10252
CNhs12323	cerebellum, adult, donor10252
CNhs12324	putamen, adult, donor10196
CNhs12338	Neurons, donor1
CNhs12339	Hair Follicle Outer Root Sheath Cells, donor1
CNhs12340	Hepatocyte, donor1
CNhs12343	CD19+ B Cells, donor1
CNhs12344	Fibroblast - Choroid Plexus, donor2
CNhs12346	Melanocyte - dark, donor2
CNhs12347	Hair Follicle Outer Root Sheath Cells, donor2
CNhs12348	Smooth Muscle Cells - Bronchial, donor2
CNhs12349	Hepatocyte, donor2
CNhs12350	Cardiac Myocyte, donor2
CNhs12352	CD19+ B Cells, donor2
CNhs12354	CD19+ B Cells, donor3
CNhs12363	mesenchymal precursor cell - adipose, donor1
CNhs12364	mesenchymal precursor cell - adipose, donor2
CNhs12365	mesenchymal precursor cell - adipose, donor3
CNhs12366	mesenchymal precursor cell - bone marrow, donor1
CNhs12367	mesenchymal precursor cell - bone marrow, donor2
CNhs12368	mesenchymal precursor cell - cardiac, donor1
CNhs12369	mesenchymal precursor cell - cardiac, donor2
CNhs12370	mesenchymal precursor cell - cardiac, donor3
CNhs12371	mesenchymal precursor cell - cardiac, donor4
CNhs12372	mesenchymal precursor cell - ovarian cancer left ovary, donor1
CNhs12373	mesenchymal precursor cell - ovarian cancer right ovary, donor1
CNhs12374	mesenchymal precursor cell - ovarian cancer metastasis, donor1
CNhs12375	mesenchymal precursor cell - ovarian cancer right ovary, donor2
CNhs12376	mesenchymal precursor cell - ovarian cancer left ovary, donor3
CNhs12377	mesenchymal precursor cell - ovarian cancer right ovary, donor3 (SOC-57-02)
CNhs12378	mesenchymal precursor cell - ovarian cancer metastasis, donor3
CNhs12379	amniotic membrane cells, donor3
CNhs12380	chorionic membrane cells, donor3
CNhs12398	Fibroblast - skin spinal muscular atrophy, donor3 (nuclear fraction)
CNhs12399	Fibroblast - skin dystrophia myotonica, donor3 (nuclear fraction)
CNhs12400	Fibroblast - Aortic Adventitial, donor3 (nuclear fraction)
CNhs12401	Smooth Muscle Cells - Aortic, donor0 (cytoplasmic fraction)
CNhs12402	Smooth Muscle Cells - Aortic, donor0 (nuclear fraction)
CNhs12403	Fibroblast - skin normal, donor1 (nuclear fraction)
CNhs12404	Fibroblast - skin spinal muscular atrophy, donor1 (nuclear fraction)
CNhs12405	Fibroblast - skin dystrophia myotonica, donor1 (nuclear fraction)
CNhs12492	Mesenchymal stem cells - umbilical, donor0
CNhs12493	Fibroblast - Periodontal Ligament, donor4 (PL29)
CNhs12495	Endothelial Cells - Aortic, donor1
CNhs12496	Endothelial Cells - Artery, donor1
CNhs12498	Fibroblast - Cardiac, donor1
CNhs12499	Fibroblast - Dermal, donor1
CNhs12502	amniotic membrane cells, donor1
CNhs12503	amniotic membrane cells, donor2
CNhs12504	chorionic membrane cells, donor1
CNhs12506	chorionic membrane cells, donor2
CNhs12531	CD19+ B Cells (pluriselect), donor090325, donation1
CNhs12538	Mallassez-derived cells, donor1 (MZH3)
CNhs12546	Basophils, donor1
CNhs12548	Eosinophils, donor2
CNhs12552	CD133+ stem cells - adult bone marrow derived, pool1
CNhs12553	CD34+ stem cells - adult bone marrow derived, donor1, tech_rep2
CNhs12554	nasal epithelial cells, donor1, tech_rep2
CNhs12558	mature adipocyte, donor1
CNhs12559	mature adipocyte, donor2
CNhs12560	mature adipocyte, donor3
CNhs12562	mature adipocyte, donor4
CNhs12563	Basophils, donor2
CNhs12566	Mast cell, donor1
CNhs12567	Smooth Muscle Cells - Tracheal, donor2
CNhs12568	Lens Epithelial Cells, donor2
CNhs12569	Smooth Muscle Cells - Umbilical Vein, donor2
CNhs12570	Melanocyte - dark, donor3
CNhs12571	Cardiac Myocyte, donor3
CNhs12572	Lens Epithelial Cells, donor3
CNhs12574	nasal epithelial cells, donor2
CNhs12575	Basophils, donor3
CNhs12581	Fibroblast - Aortic Adventitial, donor2 (nuclear fraction)
CNhs12582	Fibroblast - skin normal, donor2 (nuclear fraction)
CNhs12583	Small Airway Epithelial Cells, donor3 (nuclear fraction)
CNhs12584	Preadipocyte - breast, donor2 (nuclear fraction)
CNhs12586	Oligodendrocyte - precursors, donor1
CNhs12587	Perineurial Cells, donor1
CNhs12588	CD34+ stem cells - adult bone marrow derived, donor1, tech_rep1
CNhs12589	nasal epithelial cells, donor1, tech_rep1
CNhs12590	Perineurial Cells, donor2
CNhs12591	Melanocyte - dark, donor1
CNhs12592	Mast cell, donor4
CNhs12593	Mast cell, donor3
CNhs12594	Mast cell, donor2
CNhs12595	Smooth Muscle Cells - Intestinal, donor1
CNhs12596	Iris Pigment Epithelial Cells, donor1
CNhs12597	Smooth Muscle Cells - Umbilical Vein, donor1
CNhs12610	diencephalon, adult
CNhs12611	olfactory region, adult
CNhs12621	Schwann Cells, donor3
CNhs12624	Renal Glomerular Endothelial Cells, donor3
CNhs12626	Hepatocyte, donor3
CNhs12627	Hepatic Stellate Cells (lipocyte), donor3
CNhs12639	tenocyte, donor1
CNhs12640	tenocyte, donor2
CNhs12641	tenocyte, donor3
CNhs12642	Bronchial Epithelial Cell, donor7
CNhs12726	Neurons, donor2
CNhs12727	Smooth Muscle Cells - Esophageal, donor2
CNhs12728	Renal Cortical Epithelial Cells, donor2
CNhs12730	Mesenchymal Stem Cells - hepatic, donor2
CNhs12731	Meningeal Cells, donor3
CNhs12732	Renal Epithelial Cells, donor3
CNhs12733	Retinal Pigment Epithelial Cells, donor3
CNhs12734	Fibroblast - Conjunctival, donor3
CNhs12810	salivary acinar cells, donor1
CNhs12811	salivary acinar cells, donor2
CNhs12812	salivary acinar cells, donor3
CNhs12816	Melanocyte, donor1 (MC+1)
CNhs12822	H9 Embryoid body cells, melanocytic induction, day00, biol_rep1 (H9EB-1 d0)
CNhs12824	H9 Embryonic Stem cells, biol_rep2 (H9ES-2)
CNhs12825	H9 Embryoid body cells, melanocytic induction, day00, biol_rep2 (H9EB-2 d0)
CNhs12837	H9 Embryonic Stem cells, biol_rep3 (H9ES-3)
CNhs12840	cerebral meninges, adult
CNhs12842	appendix, adult
CNhs12843	artery, adult
CNhs12844	vein, adult
CNhs12845	bone marrow, adult
CNhs12846	ductus deferens, adult
CNhs12847	epididymis, adult
CNhs12848	gall bladder, adult
CNhs12849	parotid gland, adult
CNhs12850	penis, adult
CNhs12851	seminal vesicle, adult
CNhs12852	submaxillary gland, adult
CNhs12853	tongue, adult
CNhs12854	vagina, adult
CNhs12855	heart - mitral valve, adult
CNhs12856	heart - pulmonic valve, adult
CNhs12857	heart - tricuspid valve, adult
CNhs12858	throat, adult
CNhs12894	Smooth Muscle Cells - Tracheal, donor3
CNhs12908	H9 Embryoid body cells, melanocytic induction, day00, biol_rep3 (H9EB-3 d0)
CNhs12920	Fibroblast - Villous Mesenchymal, donor3
CNhs12921	Keratocytes, donor3
CNhs12922	Mesenchymal Stem Cells - adipose, donor3
CNhs12996	temporal lobe, fetal, donor1, tech_rep2
CNhs12997	duodenum, fetal, donor1, tech_rep2
CNhs12998	testis, adult, pool2
CNhs13076	Smooth Muscle Cells - Umbilical Vein, donor3
CNhs13092	mesenchymal precursor cell - ovarian cancer left ovary, donor2
CNhs13093	mesenchymal precursor cell - ovarian cancer metastasis, donor2
CNhs13094	mesenchymal precursor cell - ovarian cancer left ovary, donor4
CNhs13096	mesenchymal precursor cell - ovarian cancer right ovary, donor4
CNhs13097	mesenchymal precursor cell - ovarian cancer metastasis, donor4
CNhs13098	mesenchymal precursor cell - bone marrow, donor3
CNhs13156	Melanocyte, donor2 (MC+2)
CNhs13157	Lymphatic Endothelial cells response to VEGFC, 00hr00min, biol_rep2 (MM XIV - 1)
CNhs13195	CD4+CD25+CD45RA- memory regulatory T cells, donor1
CNhs13202	CD4+CD25-CD45RA+ naive conventional T cells expanded, donor1
CNhs13203	CD4+CD25+CD45RA+ naive regulatory T cells expanded, donor1
CNhs13204	CD4+CD25+CD45RA- memory regulatory T cells expanded, donor1
CNhs13205	CD4+CD25-CD45RA+ naive conventional T cells, donor2
CNhs13206	CD4+CD25+CD45RA- memory regulatory T cells, donor2
CNhs13207	CD14-CD16+ Monocytes, donor2
CNhs13208	CD14+CD16+ Monocytes, donor2
CNhs13215	CD4+CD25-CD45RA- memory conventional T cells expanded, donor1
CNhs13216	CD14+CD16- Monocytes, donor2
CNhs13223	CD4+CD25-CD45RA+ naive conventional T cells, donor1
CNhs13224	CD14+CD16- Monocytes, donor1
CNhs13229	CD14-CD16+ Monocytes, donor1
CNhs13235	CD4+CD25+CD45RA+ naive regulatory T cells, donor2
CNhs13237	CD4+CD25-CD45RA- memory conventional T cells, donor2
CNhs13238	CD4+CD25+CD45RA+ naive regulatory T cells, donor1
CNhs13239	CD4+CD25-CD45RA- memory conventional T cells, donor1
CNhs13276	Lymphatic Endothelial cells response to VEGFC, 00hr00min, biol_rep3 (MM XXII - 1 )
CNhs13339	Aortic smooth muscle cell response to FGF2, 00hr00min, biol_rep1 (LK1)
CNhs13349	Aortic smooth muscle cell response to IL1b, 00hr00min, biol_rep1 (LK31)
CNhs13358	Aortic smooth muscle cell response to FGF2, 00hr00min, biol_rep2 (LK2)
CNhs13369	Aortic smooth muscle cell response to IL1b, 00hr00min, biol_rep2 (LK32)
CNhs13406	Melanocyte, donor3 (MC+3)
CNhs13420	mesenchymal stem cells (adipose derived), adipogenic induction, 00hr00min, biol_rep2
CNhs13421	mesenchymal stem cells (adipose derived), adipogenic induction, 00hr00min, biol_rep3
CNhs13435	achilles tendon, donor2
CNhs13437	cerebrospinal fluid, donor2
CNhs13439	cruciate ligament, donor2
CNhs13440	eye - vitreous humor, donor1
CNhs13441	eye - muscle superior, donor2
CNhs13442	eye - muscle lateral, donor2
CNhs13443	eye - muscle medial, donor2
CNhs13444	eye - muscle inferior rectus, donor1
CNhs13445	Fingernail (including nail plate, eponychium and hyponychium), donor2
CNhs13449	optic nerve, donor1
CNhs13454	skeletal muscle - soleus muscle, donor1
CNhs13458	Skin - palm, donor1
CNhs13460	tongue epidermis (fungiform papillae), donor1
CNhs13464	Urethra, donor2
CNhs13465	CD14+ monocytes - treated with BCG, donor1
CNhs13466	CD14+ monocytes - treated with IFN + N-hexane, donor1
CNhs13467	CD14+ monocytes - treated with Trehalose dimycolate (TDM), donor1
CNhs13468	CD14+ monocytes - mock treated, donor1
CNhs13469	CD14+ monocytes - treated with Group A streptococci, donor1
CNhs13470	CD14+ monocytes - treated with lipopolysaccharide, donor1
CNhs13471	CD14+ monocytes - treated with Salmonella, donor1
CNhs13472	CD14+ monocytes - treated with Cryptococcus, donor1
CNhs13473	CD14+ monocytes - treated with Candida, donor1
CNhs13474	CD14+ monocytes - treated with B-glucan, donor1
CNhs13475	CD14+ monocytes - treated with BCG, donor2
CNhs13476	CD14+ monocytes - treated with IFN + N-hexane, donor2
CNhs13480	immature langerhans cells, donor2
CNhs13483	CD14+ monocytes - treated with Trehalose dimycolate (TDM), donor2
CNhs13484	CD14+ monocytes - mock treated, donor2
CNhs13485	CD14+ monocytes - treated with Salmonella, donor2
CNhs13487	CD14+ monocytes - treated with Cryptococcus, donor2
CNhs13488	CD14+ monocytes - treated with Candida, donor2
CNhs13489	CD14+ monocytes - treated with B-glucan, donor2
CNhs13490	CD14+ monocytes - treated with IFN + N-hexane, donor3
CNhs13491	CD14+ monocytes - mock treated, donor3
CNhs13492	CD14+ monocytes - treated with Group A streptococci, donor3
CNhs13493	CD14+ monocytes - treated with Salmonella, donor3
CNhs13494	CD14+ monocytes - treated with Candida, donor3
CNhs13495	CD14+ monocytes - treated with B-glucan, donor3
CNhs13507	mesenchymal precursor cell - ovarian cancer right ovary, donor3 (SOC-57-02-G)
CNhs13512	CD4+CD25-CD45RA+ naive conventional T cells, donor3
CNhs13532	CD14+ monocytes - treated with Group A streptococci, donor2
CNhs13533	CD14+ monocytes - treated with lipopolysaccharide, donor2
CNhs13535	migratory langerhans cells, donor1
CNhs13536	migratory langerhans cells, donor2
CNhs13537	immature langerhans cells, donor1
CNhs13538	CD4+CD25+CD45RA- memory regulatory T cells, donor3
CNhs13539	CD4+CD25-CD45RA- memory conventional T cells, donor3
CNhs13540	CD14+CD16- Monocytes, donor3
CNhs13541	CD14+CD16+ Monocytes, donor1
CNhs13543	CD14+ monocytes - treated with BCG, donor3
CNhs13544	CD14+ monocytes - treated with Trehalose dimycolate (TDM), donor3
CNhs13545	CD14+ monocytes - treated with lipopolysaccharide, donor3
CNhs13546	CD14+ monocytes - treated with Cryptococcus, donor3
CNhs13547	migratory langerhans cells, donor3
CNhs13548	CD14-CD16+ Monocytes, donor3
CNhs13549	CD14+CD16+ Monocytes, donor3
CNhs13550	Mallassez-derived cells, donor2
CNhs13551	Mallassez-derived cells, donor3
CNhs13552	CD34 cells differentiated to erythrocyte lineage, biol_ rep1
CNhs13553	CD34 cells differentiated to erythrocyte lineage, biol_ rep2
CNhs13646	Monocyte-derived macrophages response to udorn influenza infection, 00hr00min, donor2 (150_120:Ud_0h)
CNhs13650	Monocyte-derived macrophages response to udorn influenza infection, 00hr00min, donor3 (536_119:Ud_0h)
CNhs13738	HES3-GFP Embryonic Stem cells, cardiomyocytic induction, day00, biol_rep3 (UH-3)
CNhs13793	amygdala - adult, donor10196
CNhs13794	thalamus - adult, donor10196
CNhs13795	hippocampus - adult, donor10196
CNhs13796	medial frontal gyrus - adult, donor10196
CNhs13797	parietal lobe - adult, donor10196
CNhs13800	medulla oblongata - adult, donor10196
CNhs13801	globus pallidus - adult, donor10196
CNhs13802	caudate nucleus - adult, donor10196
CNhs13804	pineal gland - adult, donor10196
CNhs13805	pituitary gland - adult, donor10196
CNhs13807	spinal cord - adult, donor10196
CNhs13808	locus coeruleus - adult, donor10196
CNhs13809	medial temporal gyrus - adult, donor10196
CNhs13811	CD4+CD25+CD45RA- memory regulatory T cells expanded, donor2
CNhs13812	CD4+CD25+CD45RA- memory regulatory T cells expanded, donor3
CNhs13813	CD4+CD25-CD45RA+ naive conventional T cells expanded, donor2
CNhs13814	CD4+CD25-CD45RA+ naive conventional T cells expanded, donor3
CNhs13815	Neurons, donor3
CNhs13816	Olfactory epithelial cells, donor1
CNhs13817	Olfactory epithelial cells, donor2
CNhs13818	Olfactory epithelial cells, donor3
CNhs13819	Olfactory epithelial cells, donor4
CNhs13822	iPS differentiation to neuron, control donor C11-CRL2429, day00, rep2
CNhs13826	iPS differentiation to neuron, control donor C32-CRL1502, day00, rep1
CNhs13839	iPS differentiation to neuron, control donor C32-CRL1502, day00, rep2
CNhs13912	putamen, adult, donor10252
CNhs13914	gamma delta positive T cells, donor1
CNhs13915	gamma delta positive T cells, donor2
CNhs13918	CD4+CD25+CD45RA+ naive regulatory T cells expanded, donor2
CNhs13919	CD4+CD25+CD45RA+ naive regulatory T cells expanded, donor3
CNhs13920	CD4+CD25-CD45RA- memory conventional T cells expanded, donor2
CNhs13921	CD4+CD25-CD45RA- memory conventional T cells expanded, donor3
CNhs13924	Mast cell, expanded, donor5
CNhs13925	Mast cell, expanded and stimulated, donor5
CNhs13926	Mast cell, expanded, donor8
CNhs13927	Mast cell, expanded and stimulated, donor8
CNhs13972	adipose, donor1
CNhs13973	adipose, donor2
CNhs13974	adipose, donor3
CNhs13975	adipose, donor4
CNhs14069	medial frontal gyrus, newborn, donor10223
CNhs14070	medial temporal gyrus, newborn, donor10223
CNhs14071	caudate nucleus, newborn, donor10223
CNhs14073	occipital cortex, newborn, donor10223
CNhs14074	parietal lobe, newborn, donor10223
CNhs14075	cerebellum, newborn, donor10223
CNhs14076	substantia nigra, newborn, donor10223
CNhs14077	spinal cord, newborn, donor10223
CNhs14078	amygdala, newborn, donor10223
CNhs14079	medulla oblongata, newborn, donor10223
CNhs14080	locus coeruleus, newborn, donor10223
CNhs14081	hippocampus, newborn, donor10223
CNhs14082	globus pallidus, newborn, donor10223
CNhs14083	putamen, newborn, donor10223
CNhs14084	thalamus, newborn, donor10223
CNhs14128	Fibroblast - Gingival, donor6 (aggressive periodontitis)
CNhs14129	Fibroblast - Gingival, donor6 (control)
CNhs14130	Fibroblast - Gingival, donor7 (aggressive periodontitis)
CNhs14131	Fibroblast - Gingival, donor7 (control)
CNhs14132	Fibroblast - Gingival, donor8 (chronic periodontitis)
CNhs14133	Fibroblast - Gingival, donor8 (control)
CNhs14134	Fibroblast - Gingival, donor9 (control)
CNhs14135	Fibroblast - Gingival, donor10 (periodontitis)
CNhs14183	Smooth muscle cells - airway, asthmatic, donor1
CNhs14184	Smooth muscle cells - airway, asthmatic, donor2
CNhs14186	Smooth muscle cells - airway, asthmatic, donor3
CNhs14187	Smooth muscle cells - airway, asthmatic, donor4
CNhs14188	Smooth muscle cells - airway, asthmatic, donor5
CNhs14189	Smooth muscle cells - airway, asthmatic, donor6
CNhs14190	Smooth muscle cells - airway, control, donor1
CNhs14191	Smooth muscle cells - airway, control, donor2
CNhs14192	Smooth muscle cells - airway, control, donor3
CNhs14193	Smooth muscle cells - airway, control, donor4
CNhs14221	medial frontal gyrus, adult, donor10258
CNhs14222	spinal cord, adult, donor10258
CNhs14223	thalamus, adult, donor10258, tech_rep1
CNhs14224	substantia nigra, adult, donor10258
CNhs14225	putamen, adult, donor10258, tech_rep1
CNhs14226	parietal cortex, adult, donor10258
CNhs14227	hippocampus, adult, donor10258
CNhs14230	pineal gland, adult, donor10258
CNhs14231	pituitary gland, adult, donor10258
CNhs14232	caudate nucleus, adult, donor10258
CNhs14549	globus pallidus, adult, donor10258
CNhs14550	locus coeruleus, adult, donor10258
CNhs14551	thalamus, adult, donor10258, tech_rep2
CNhs14558	Fibroblast - Aortic Adventitial donor2 (cytoplasmic fraction)
CNhs14559	Fibroblast - Aortic Adventitial donor3 (cytoplasmic fraction)
CNhs14560	Fibroblast - skin, normal donor1 (cytoplasmic fraction)
CNhs14562	Preadipocyte - breast donor2 (cytoplasmic fraction)
CNhs14563	Small Airway Epithelial Cells donor3 (cytoplasmic fraction)
CNhs14564	Small Airway Epithelial Cells donor2 (cytoplasmic fraction)
CNhs14565	Small Airway Epithelial Cells donor2 (nuclear fraction)
CNhs14618	putamen, adult, donor10258, tech_rep2
